# Supplementary material for: Development, Evaluation, and Implementation of a House-Made Targeted Next-Generation Sequencing Spoligotyping in a French Laboratory
Source: MDPI journal article supplement (doi:10.3390/ijms231911302), 2022-09-25

Figure S1 – S43: On the left: a violin plot. Purple circles represent the “present” spacers according to the membrane-based spoligotyping. Green circles represent the “absent” spacers according to the membrane-based spoligotyping. In the middle: Receiver operating characteristic (ROC) curve. Red circle represents the best RPM threshold. On the right: Sensibility (red line) and specificity (blue line) compared to the membrane-based spoligotyping according to the variable RPM threshold. Dotted purple line: RPM thresholds between which the sensitivity and the specificity are maximized.

Figure S1

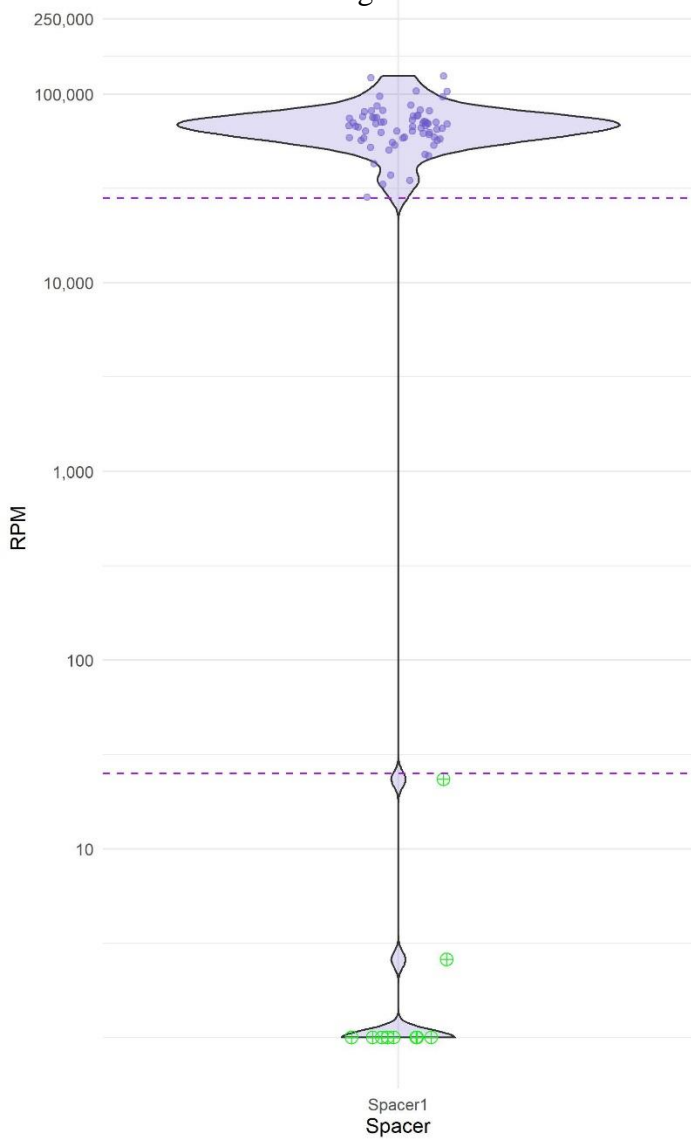

MutScan Spacer1

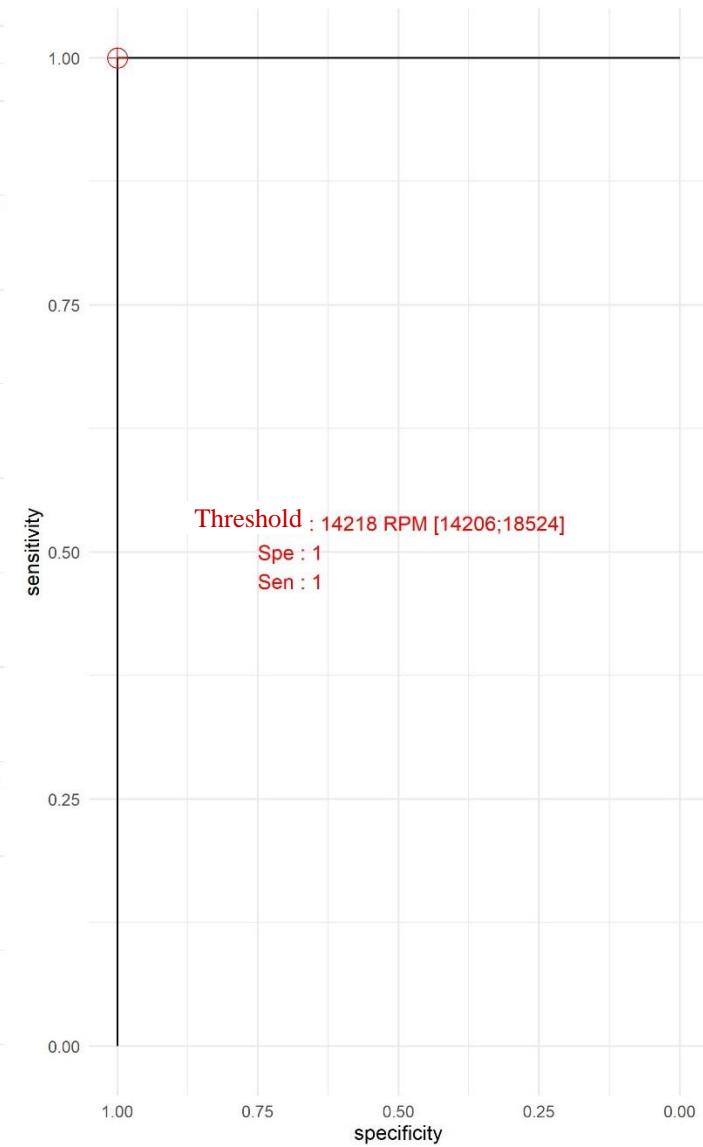

Threshold : [25;28000]

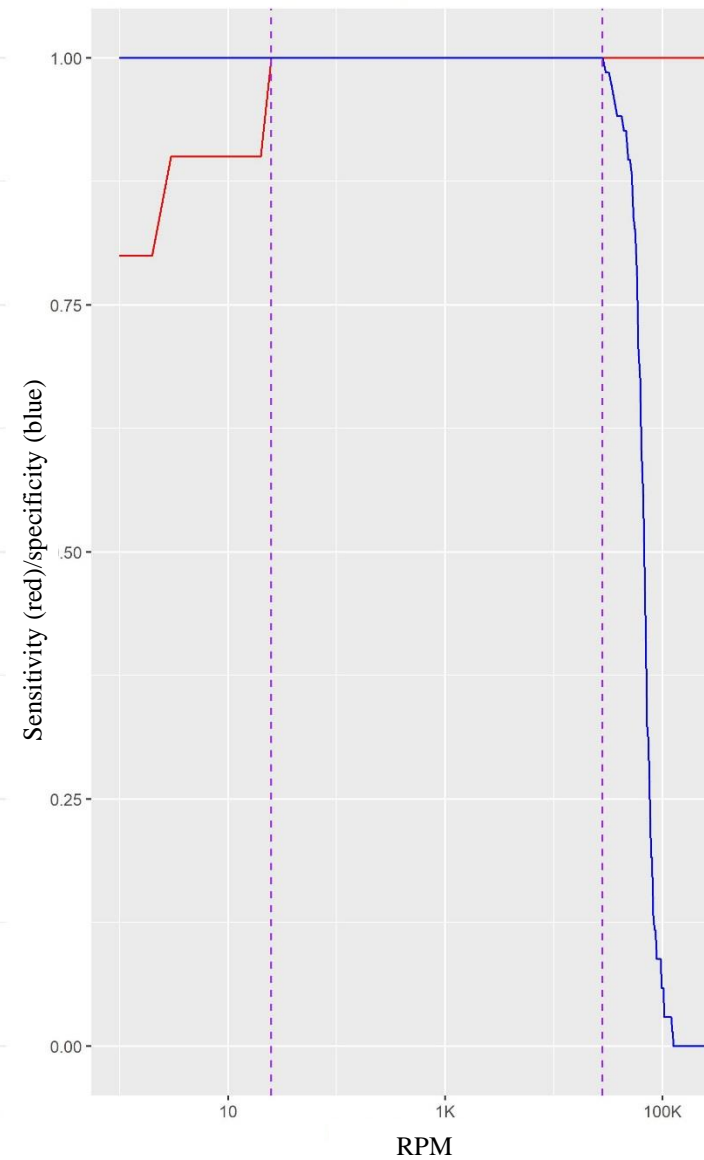

Figure S2

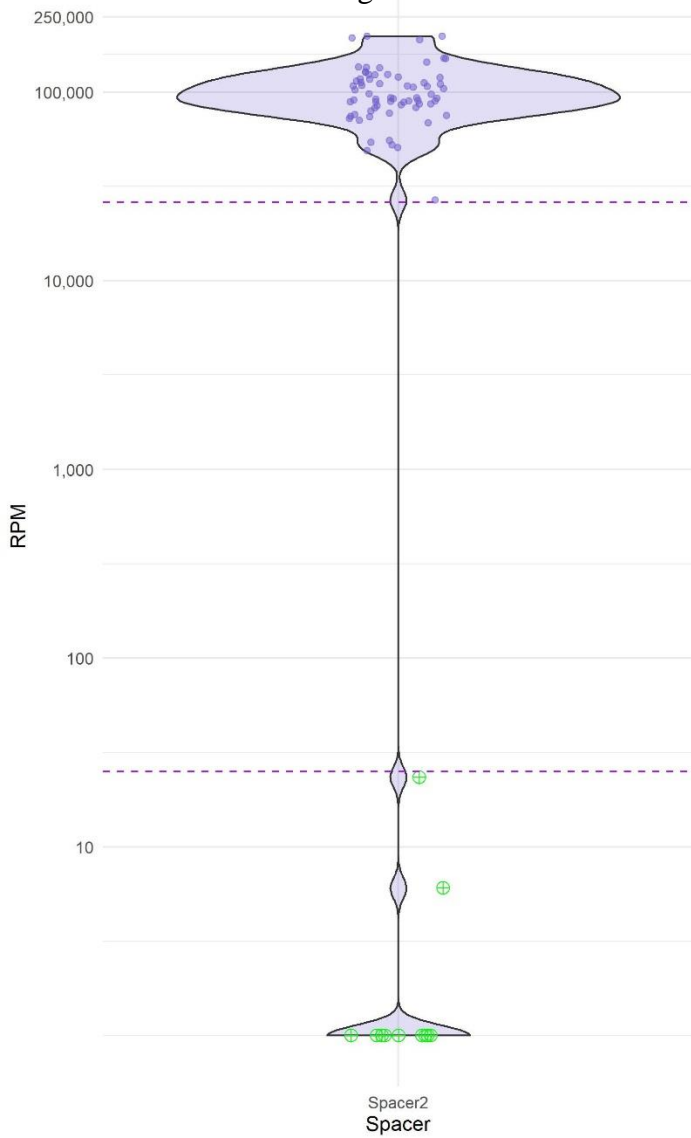

MutScan Spacer2

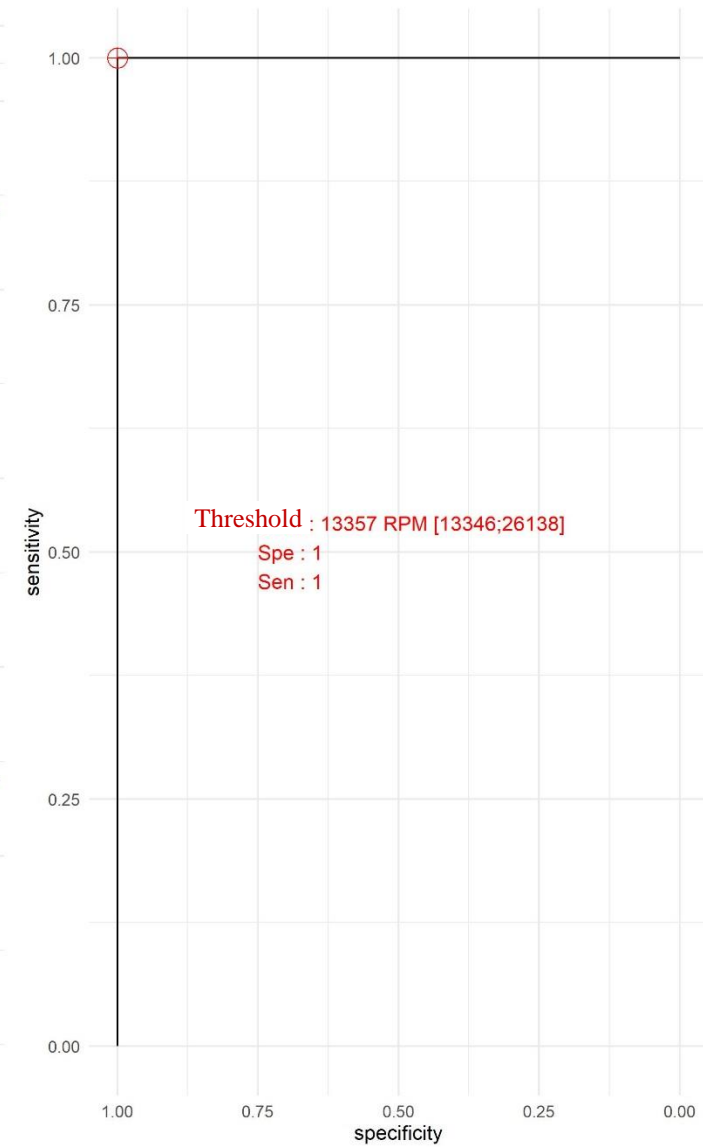

Threshold : [25;26000]

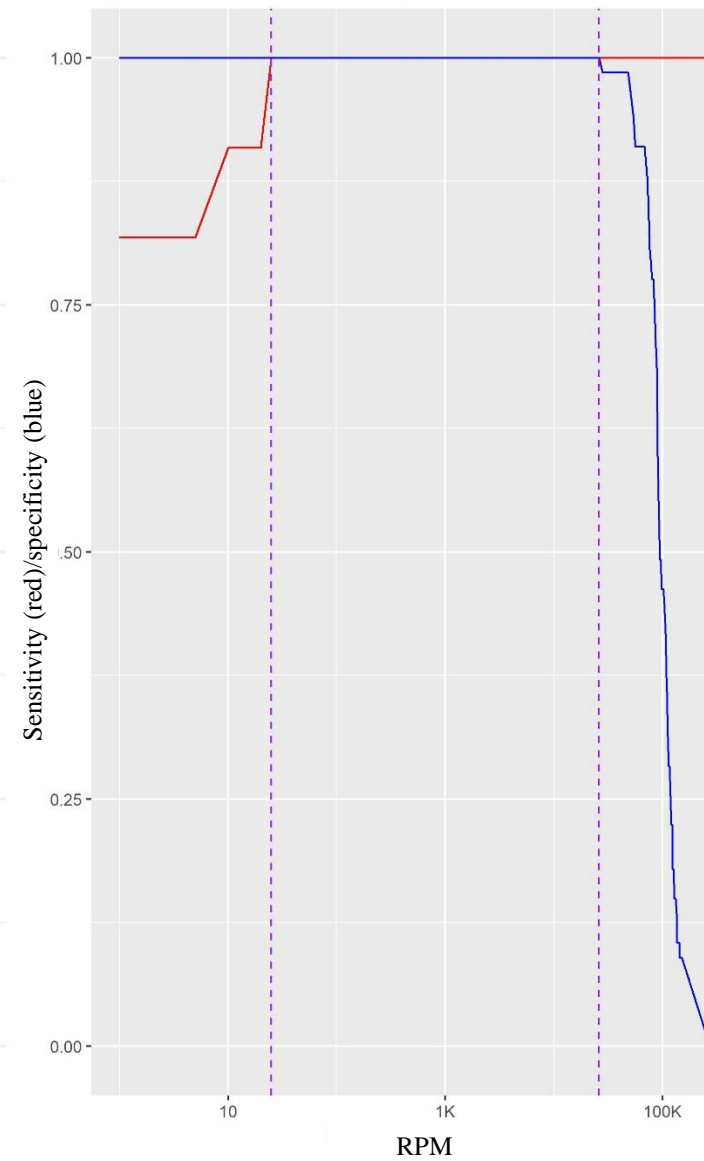

Figure S3

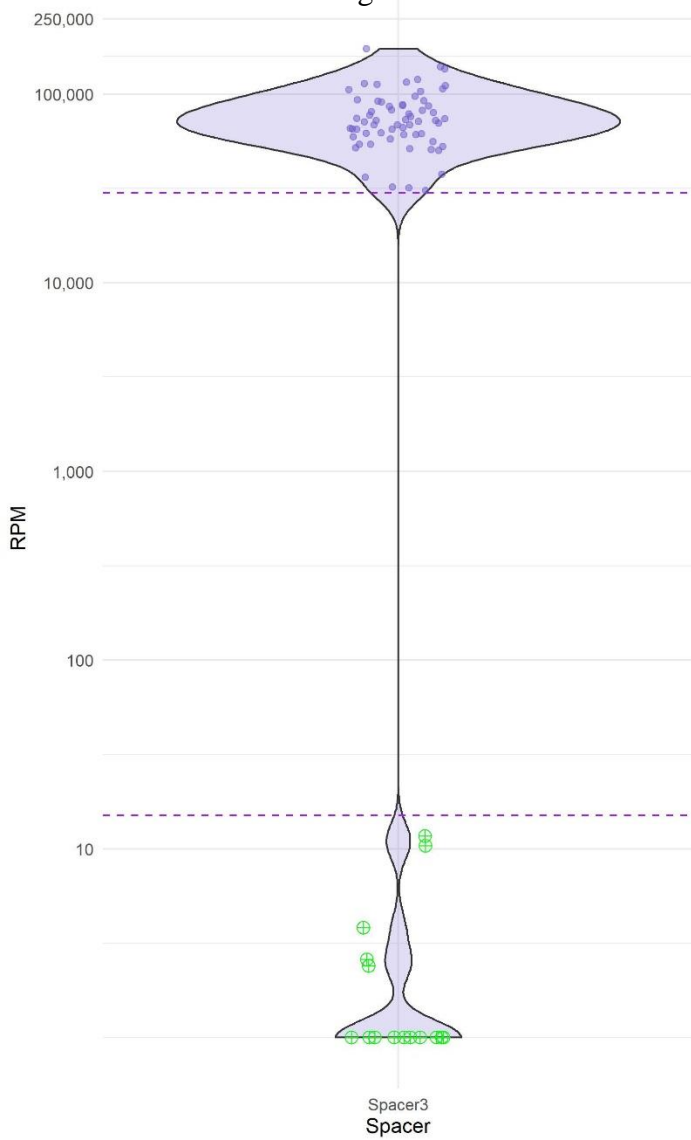

MutScan Spacer3

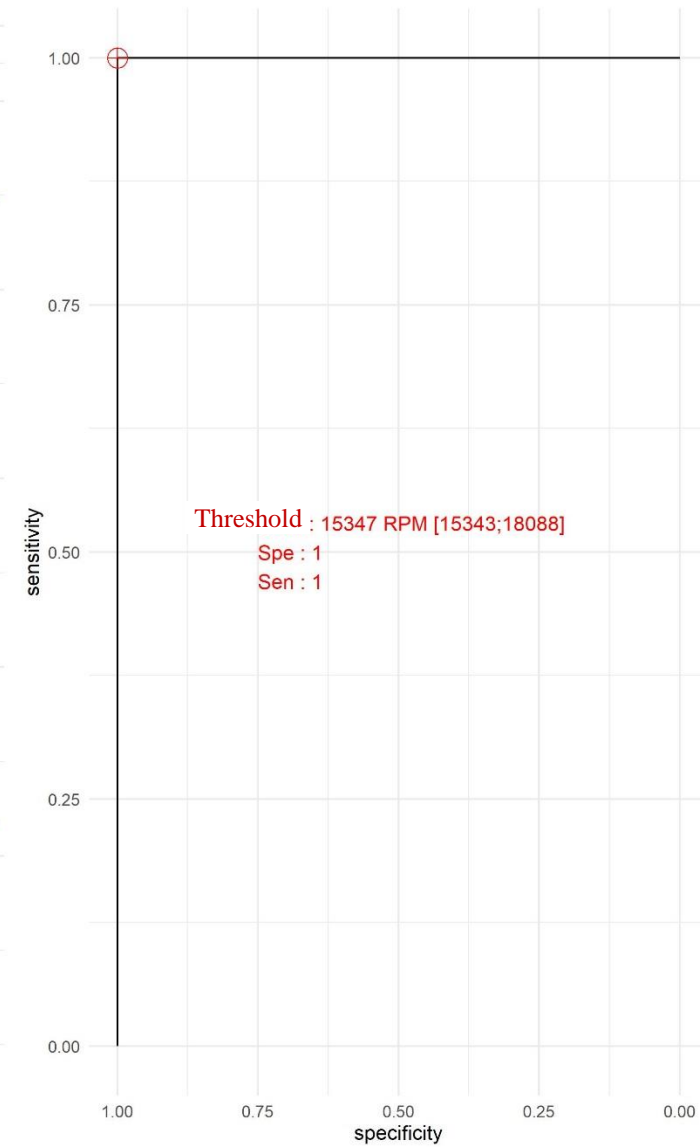

Threshold : [15;30000]

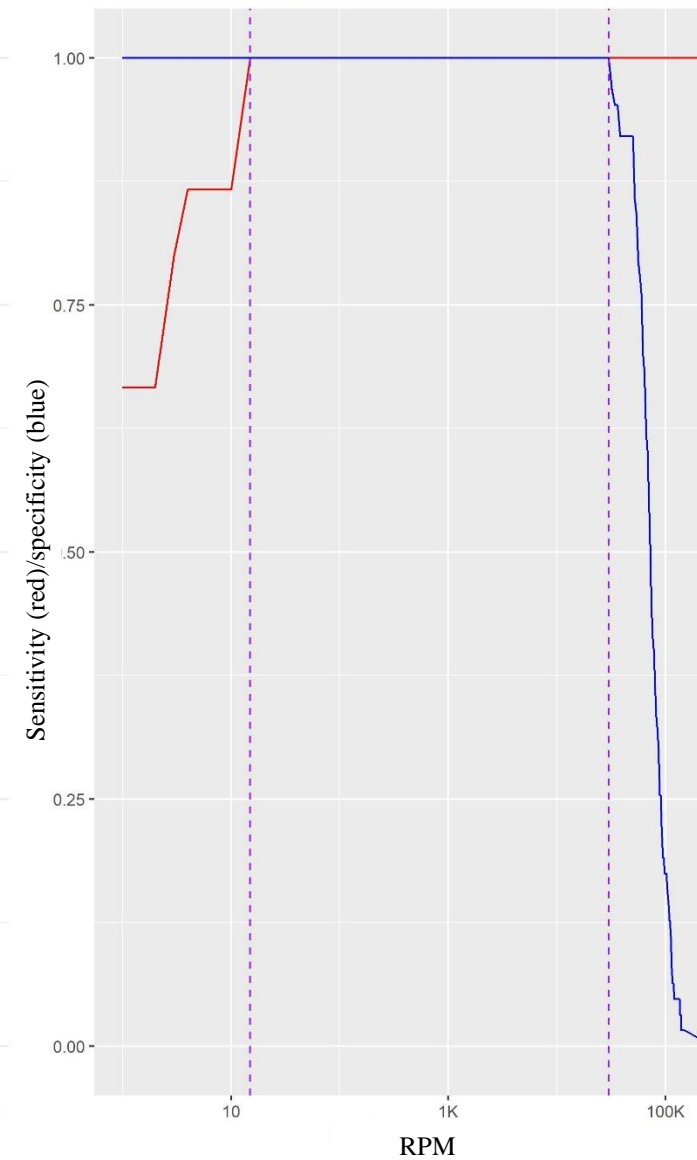

Figure S4

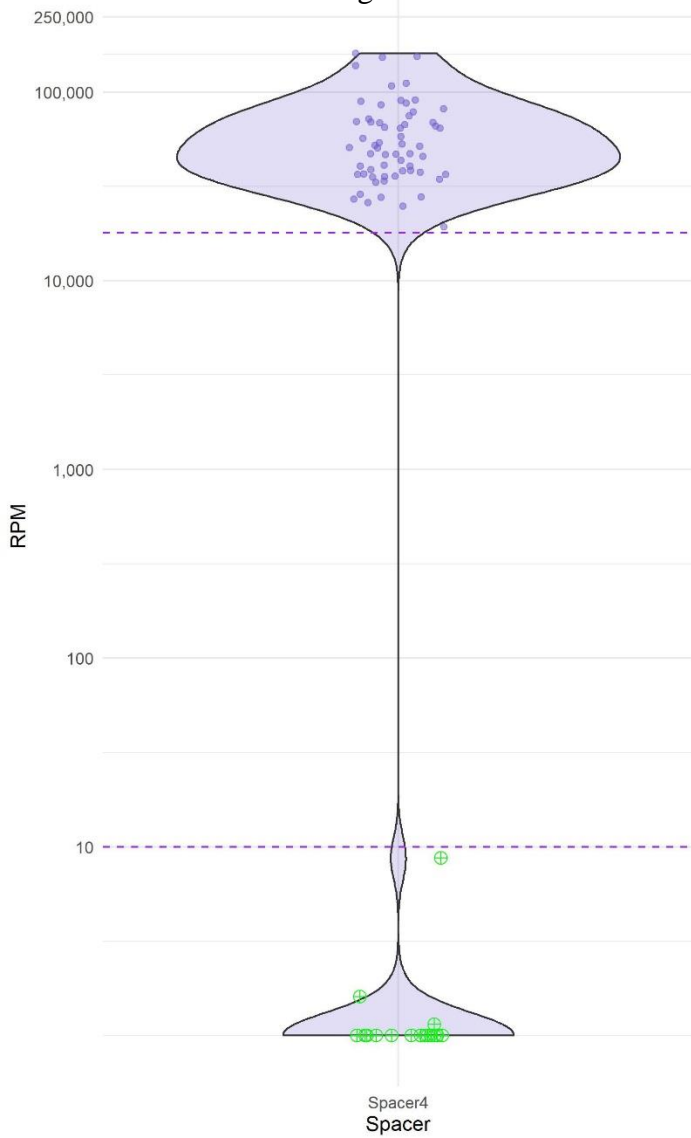

MutScan Spacer4

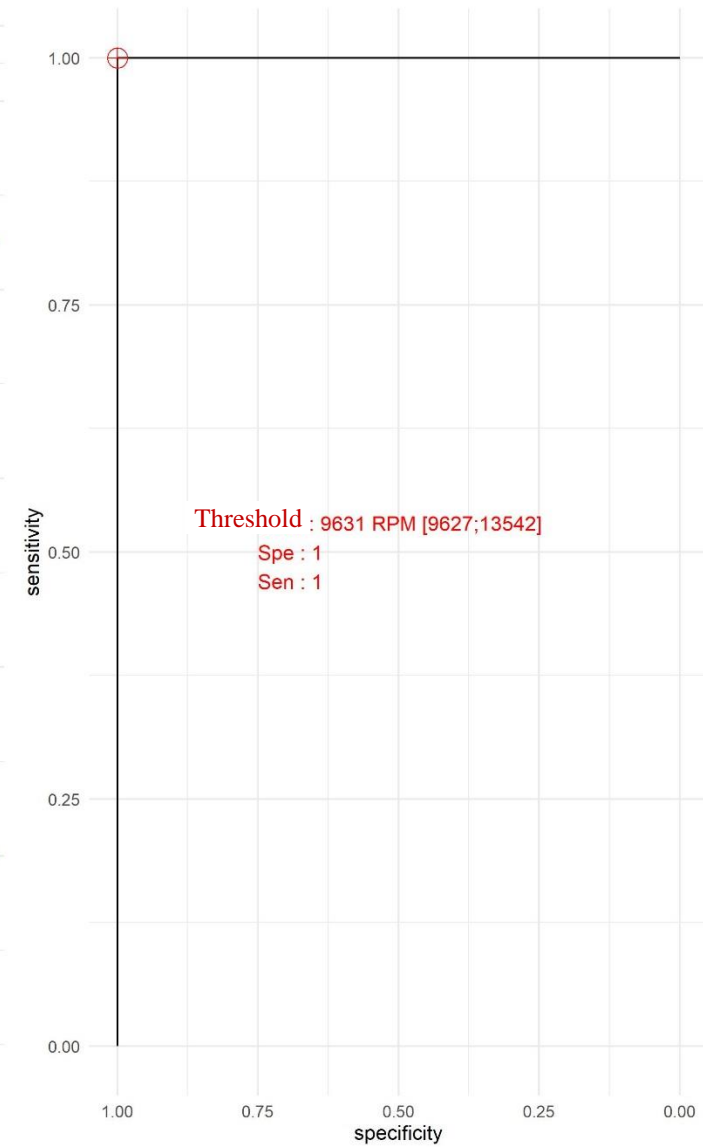

Threshold : [10;18000]

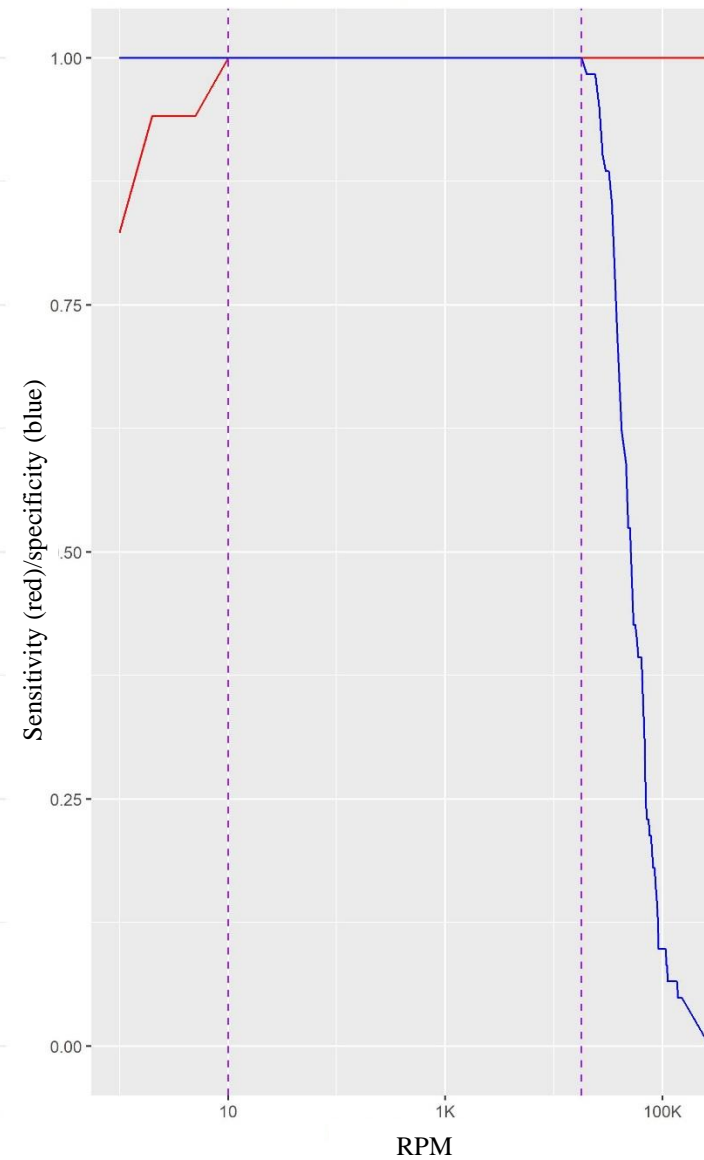

Figure S5

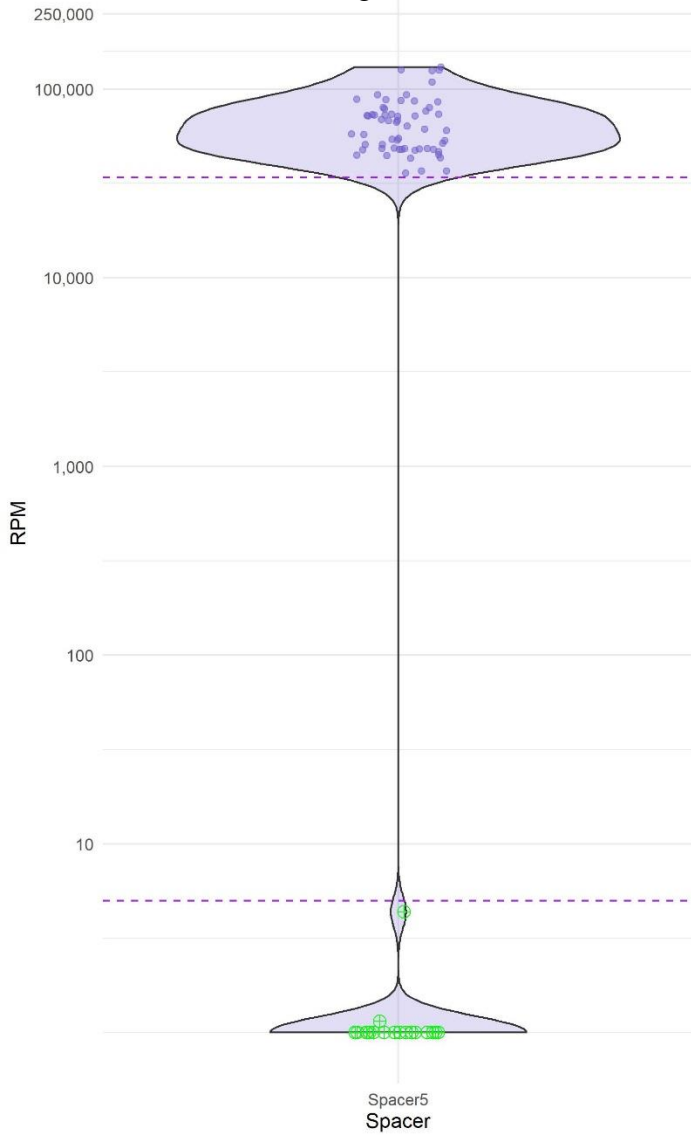

MutScan Spacer5

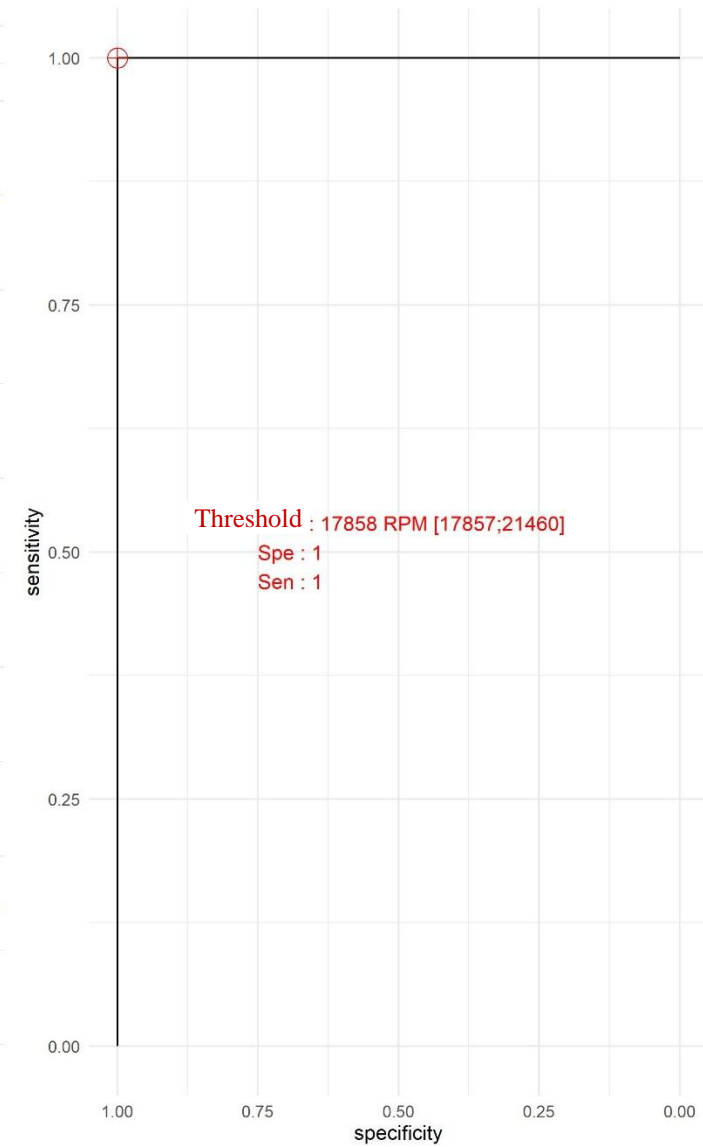

Threshold : [5;34000]

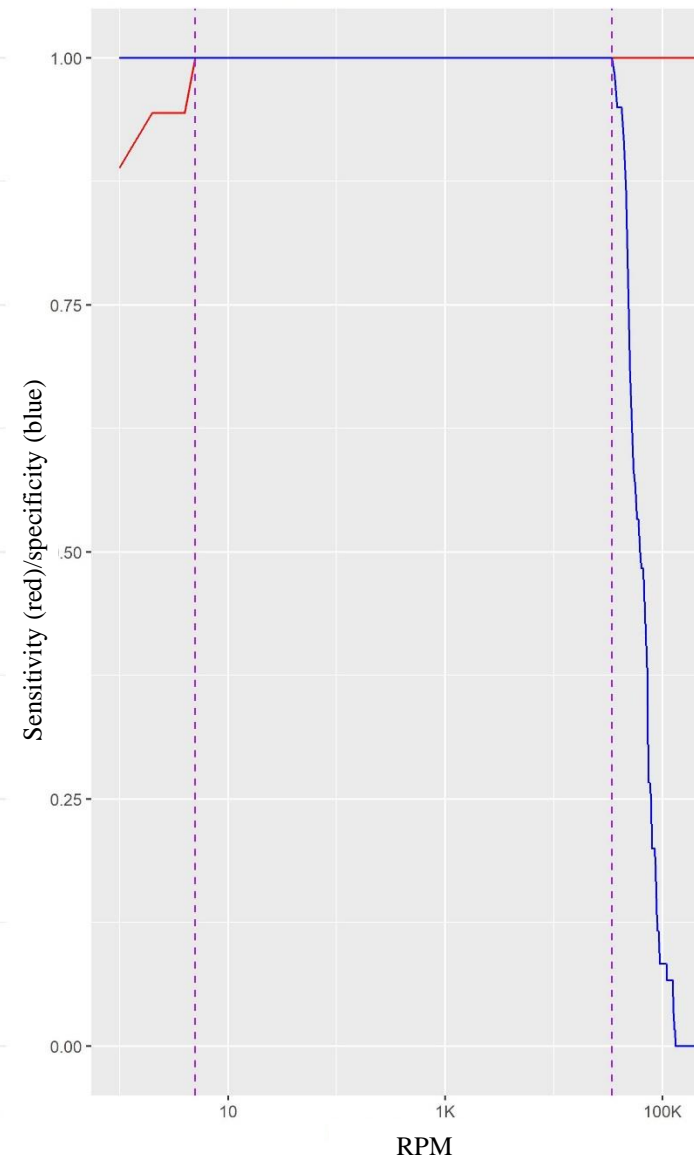

Figure S6

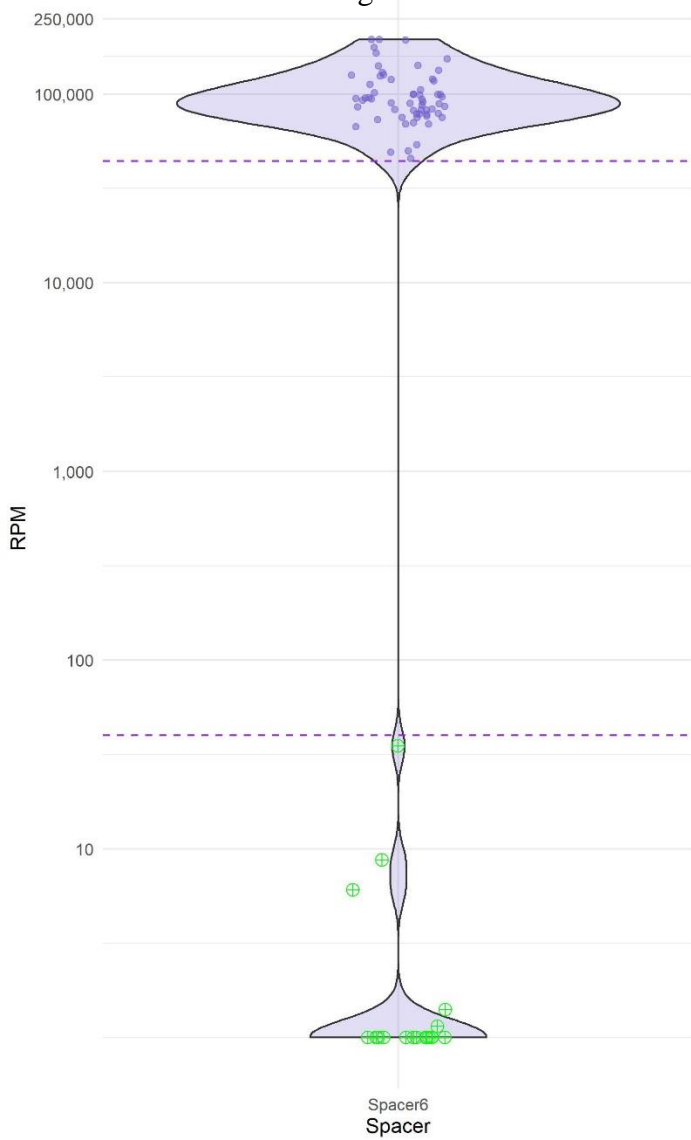

MutScan Spacer6

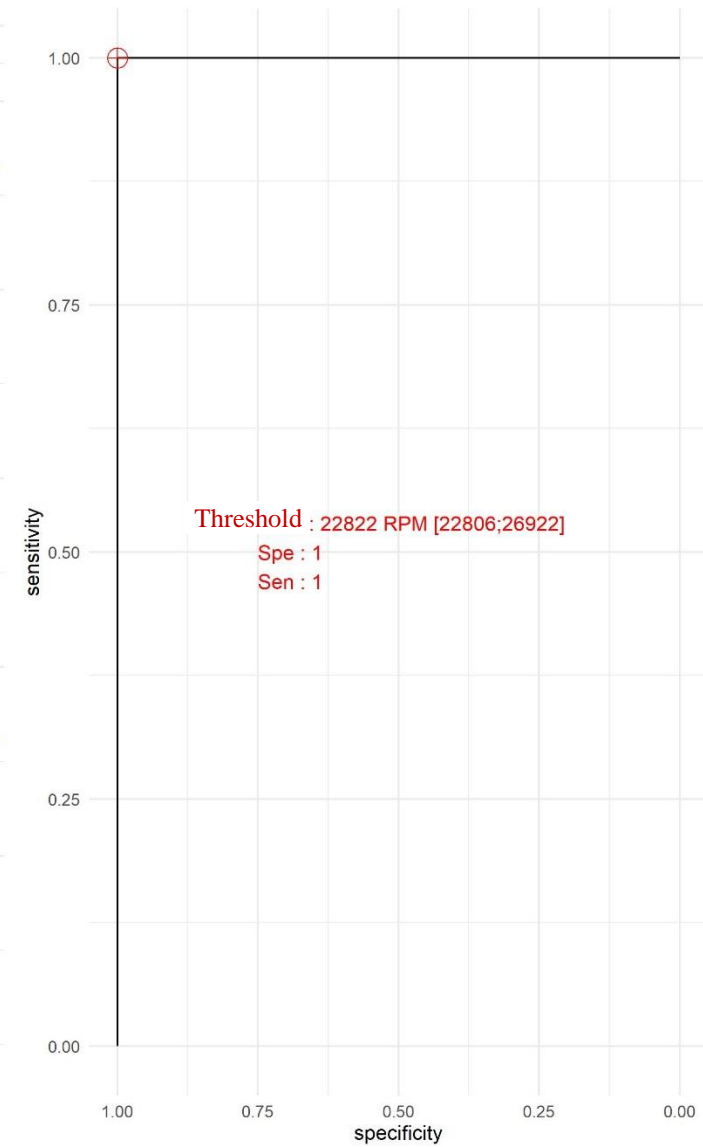

Threshold : [40;44000]

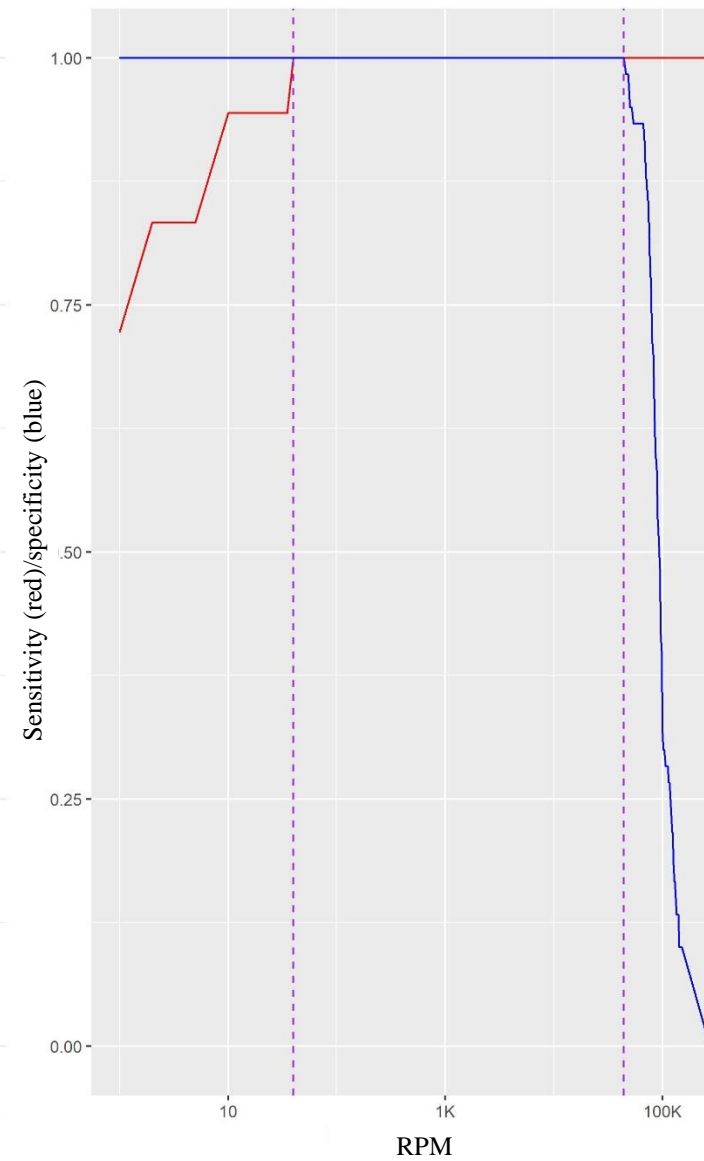

Figure S7

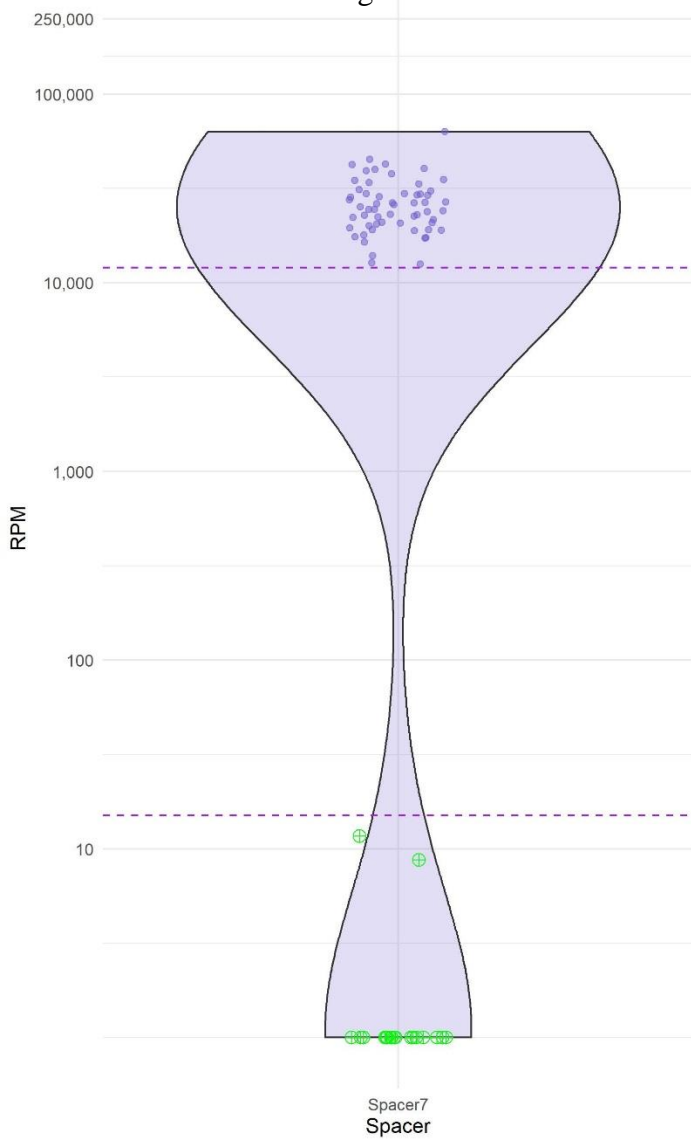

MutScan Spacer7

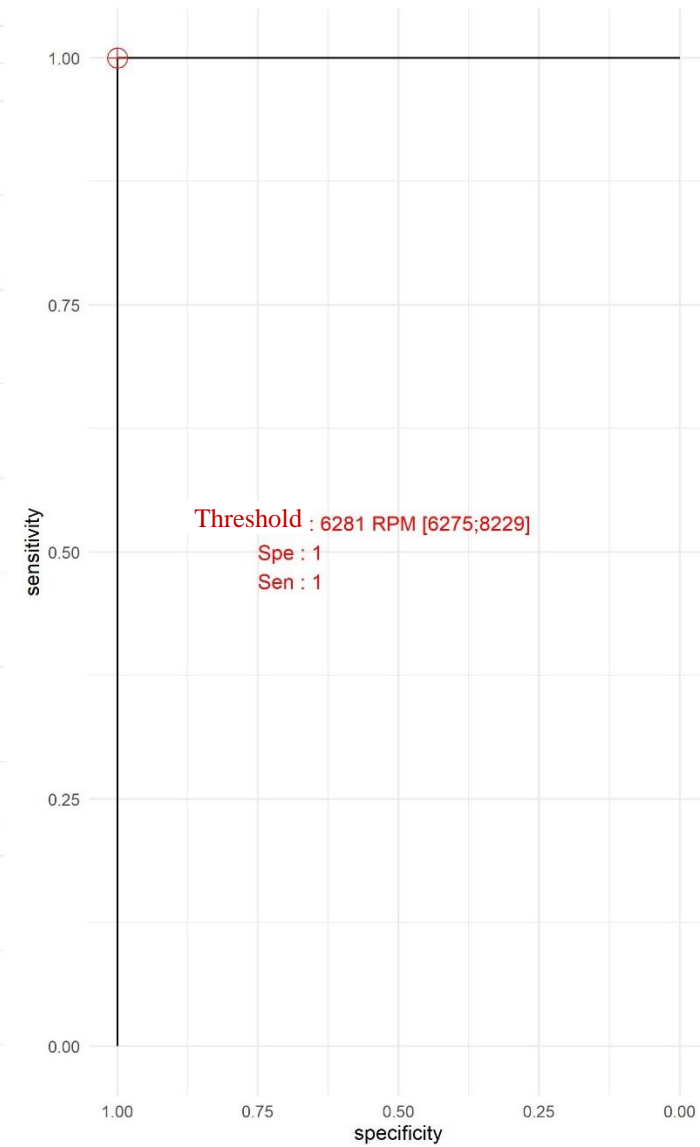

Threshold : [15;12000]

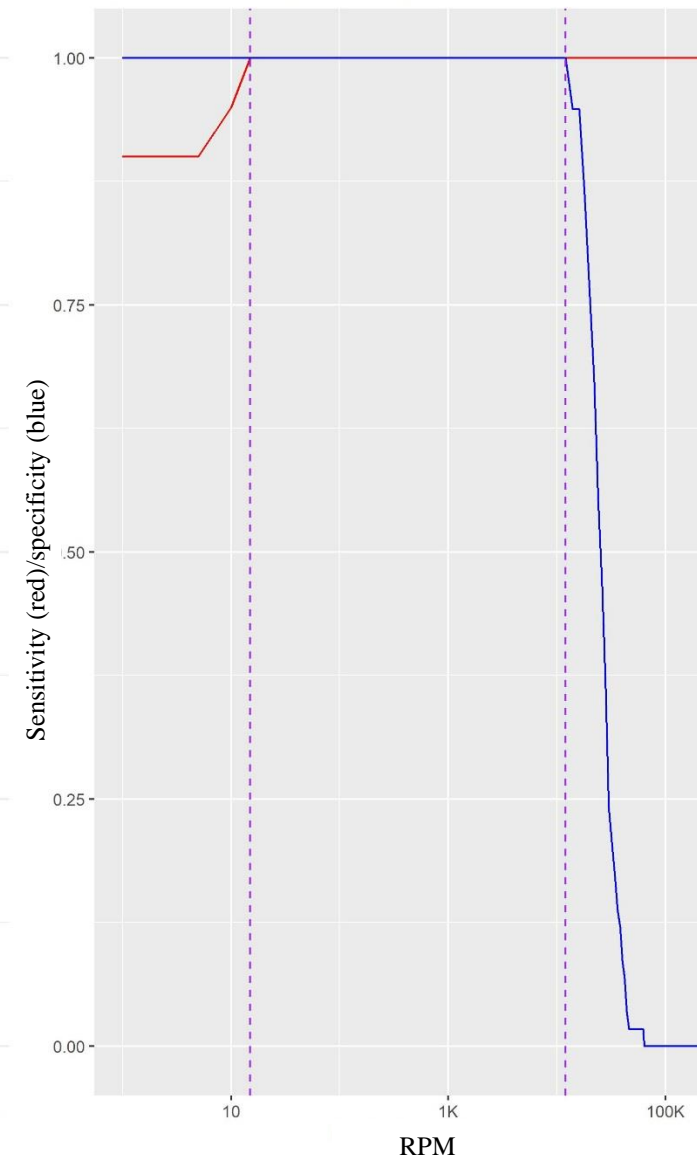



Figure S8

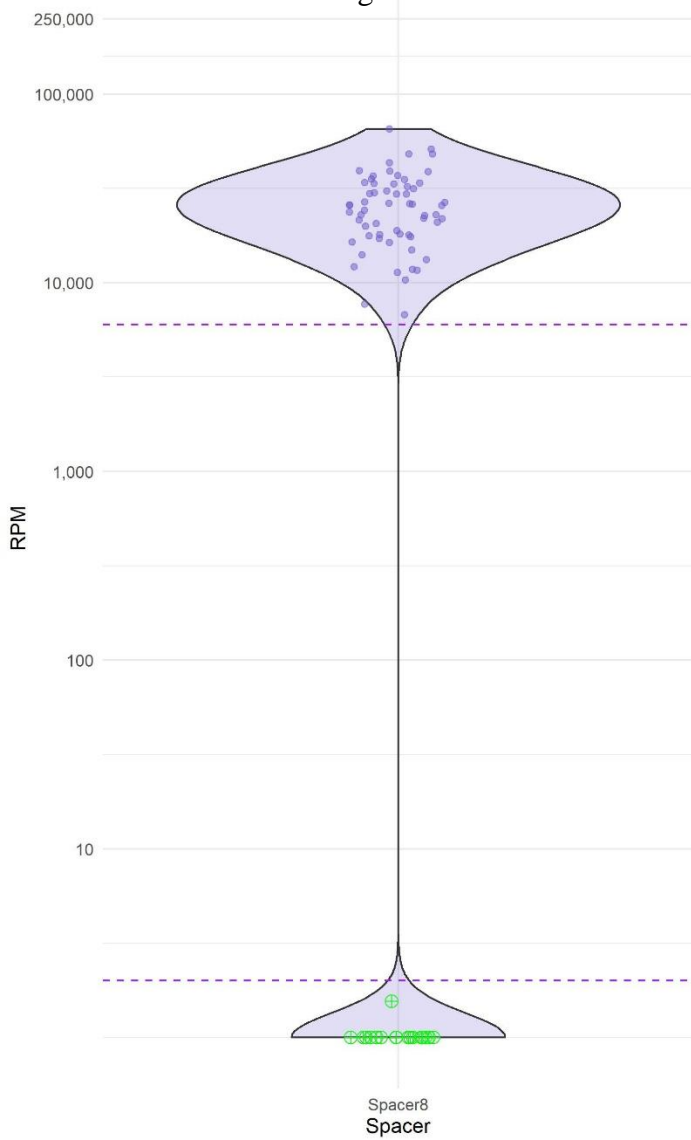

MutScan Spacer8

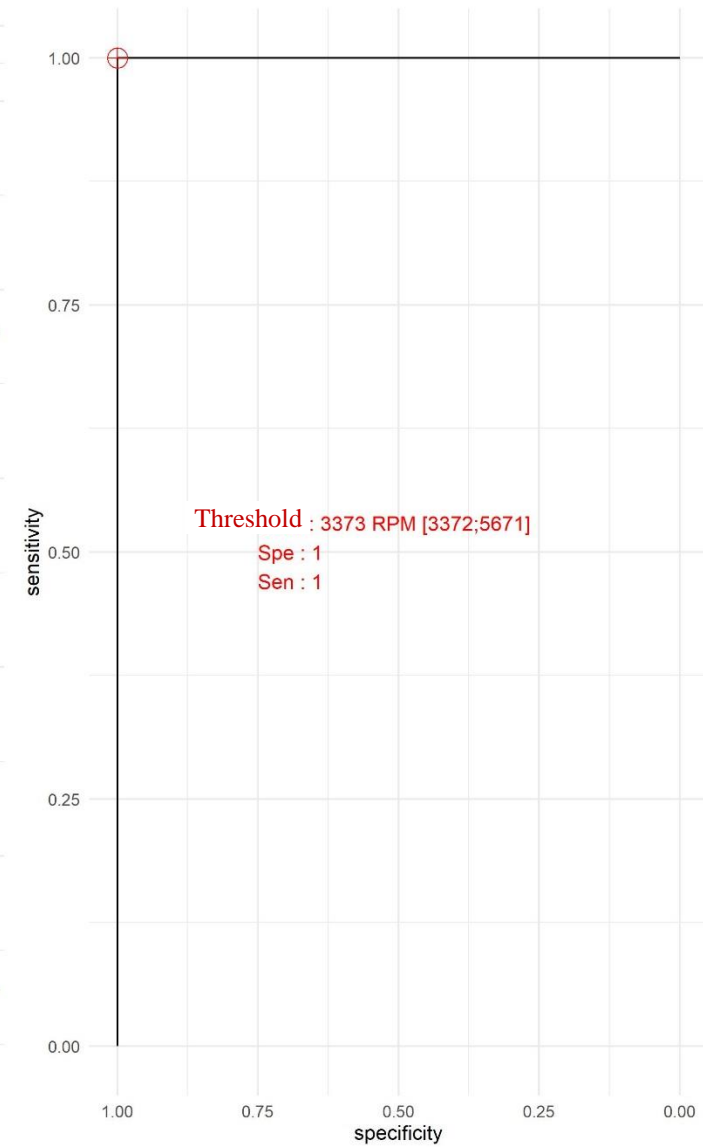

Threshold : [2;6000]

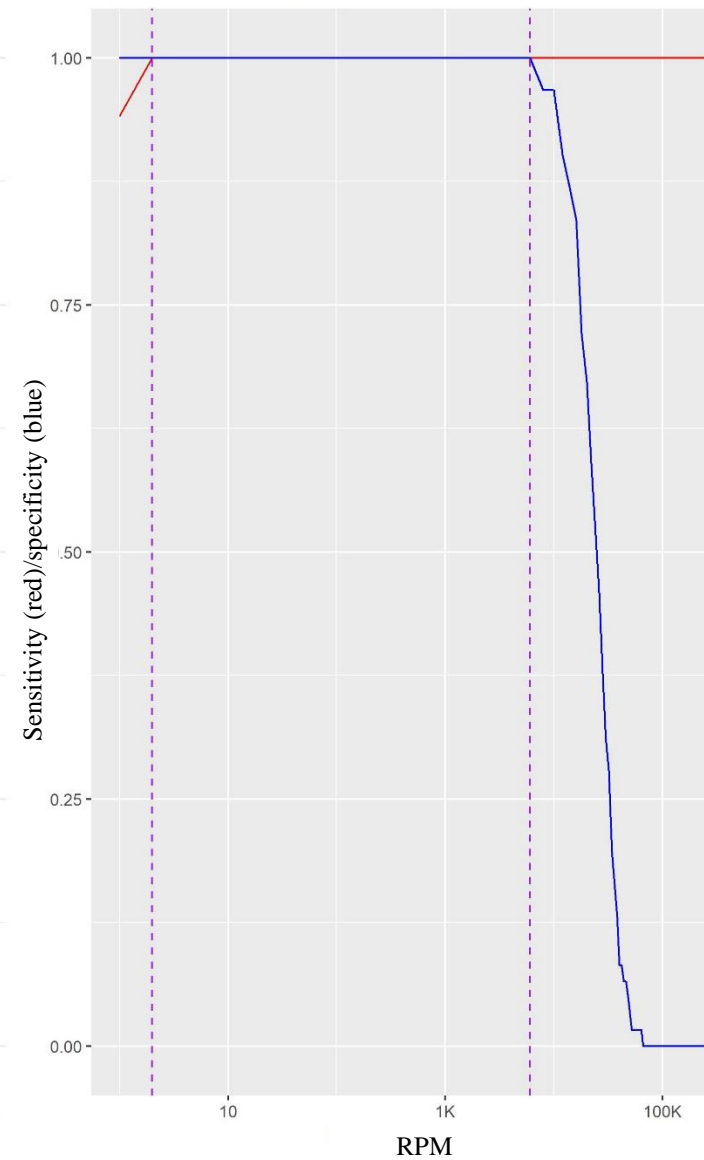

Figure S9

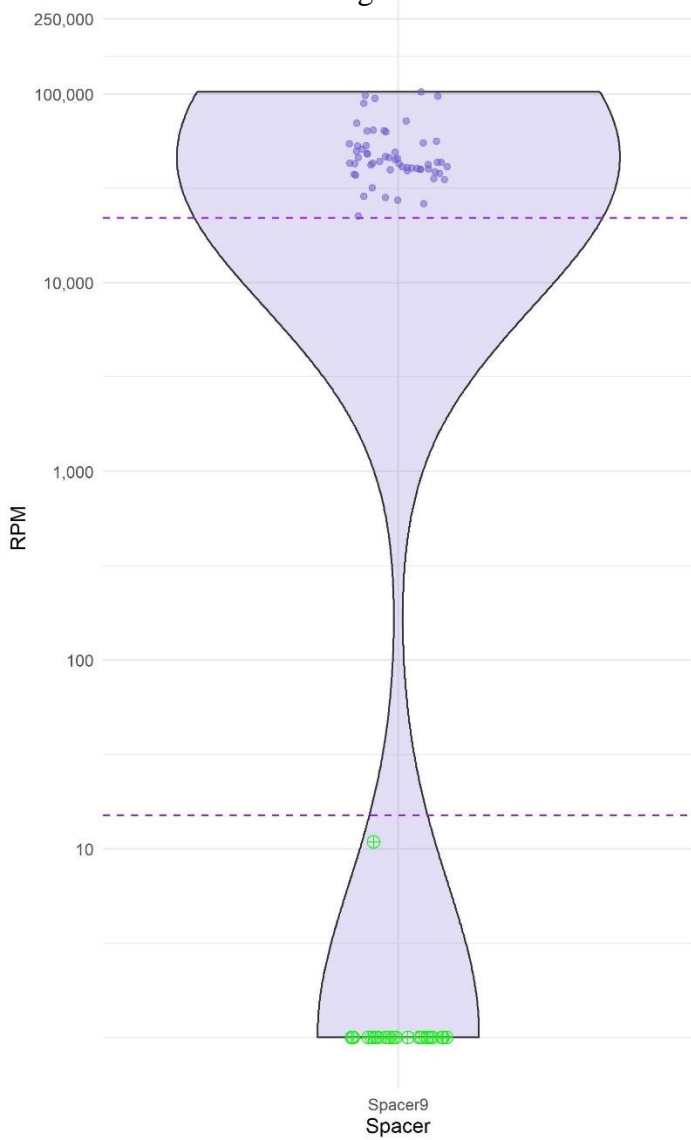

MutScan Spacer9

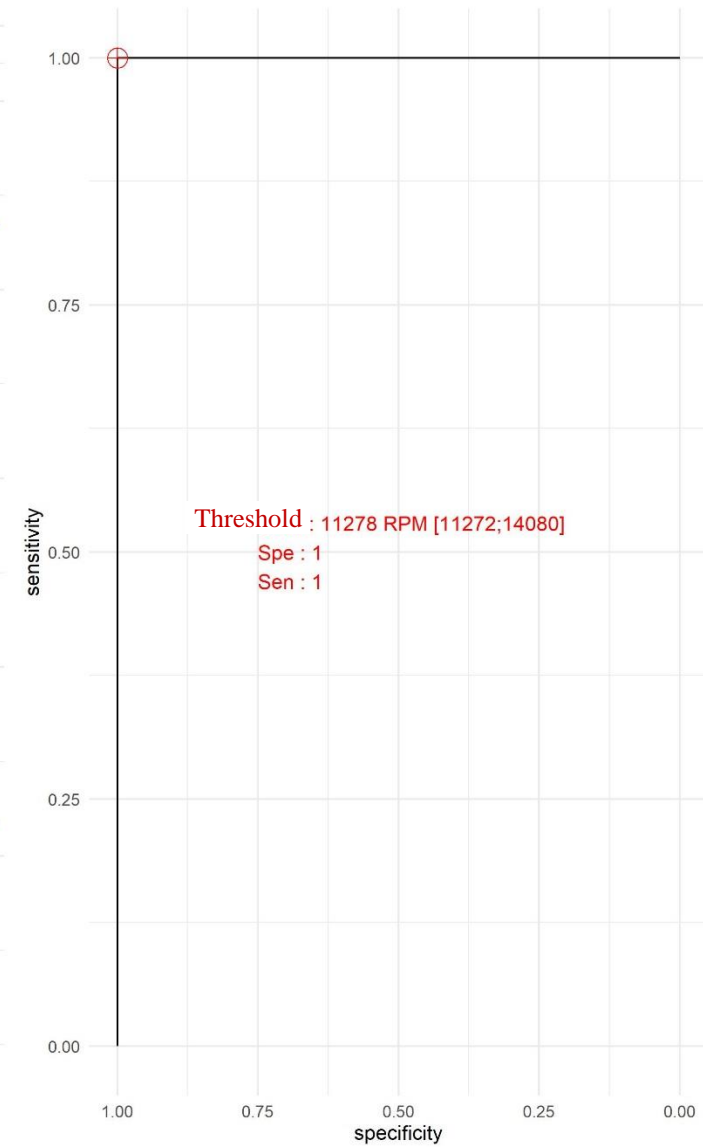

Threshold : [15;22000]

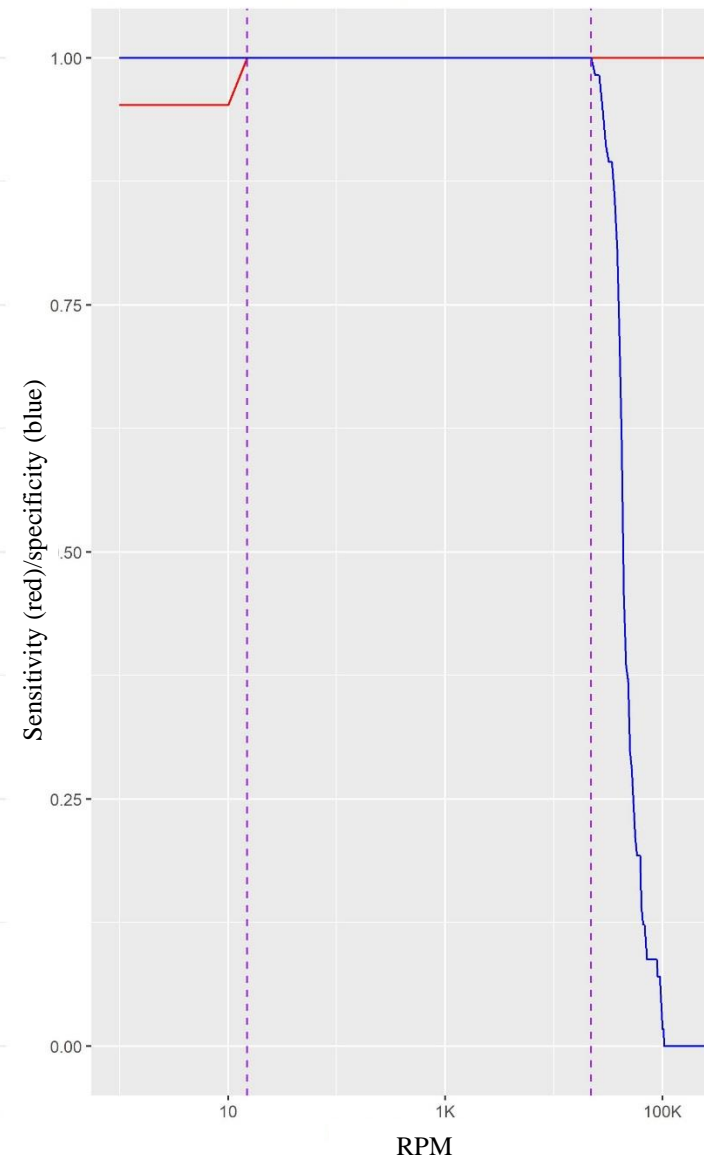

Figure S10

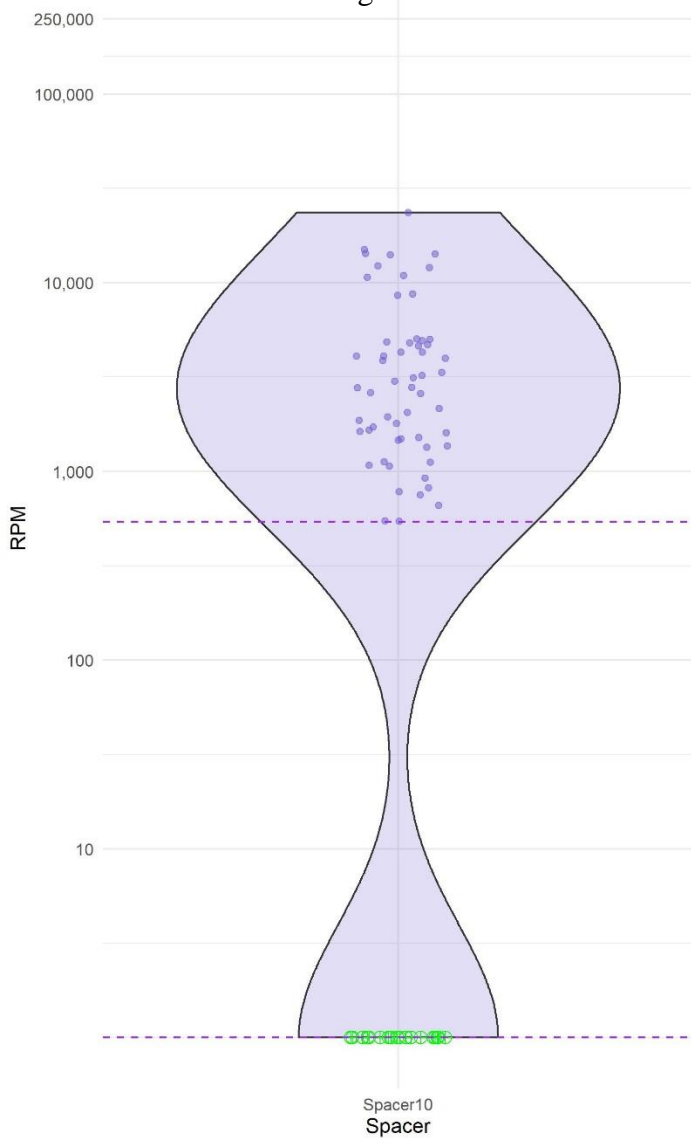

MutScan Spacer10

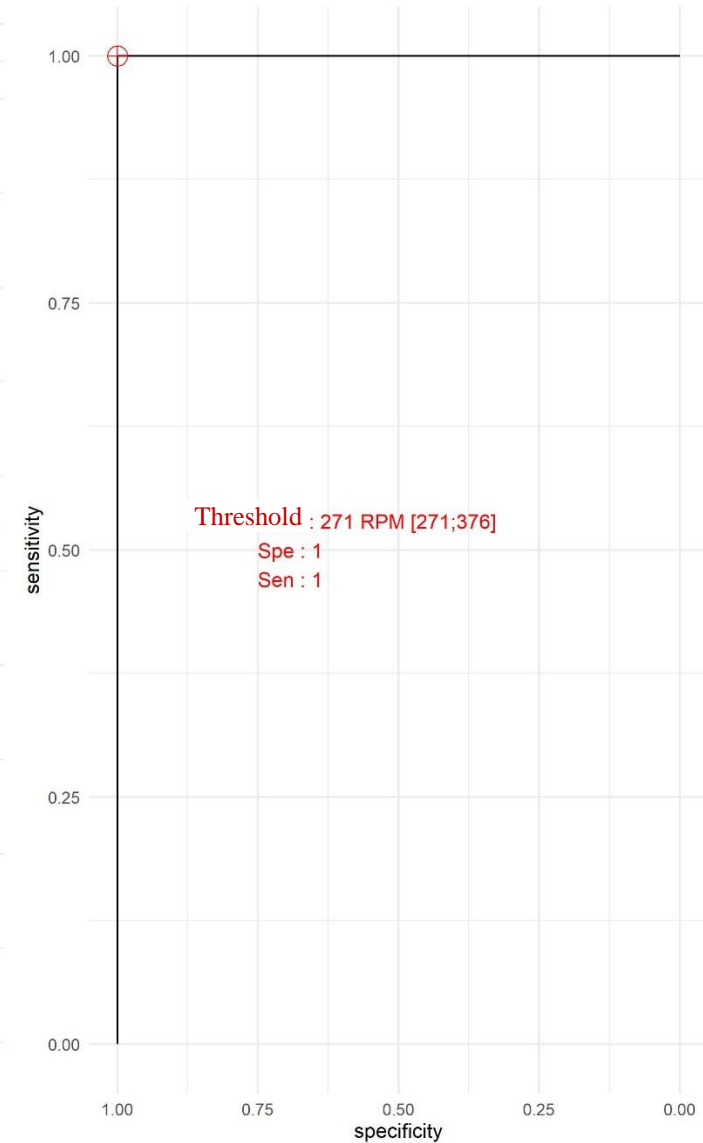

Threshold : [1;540]

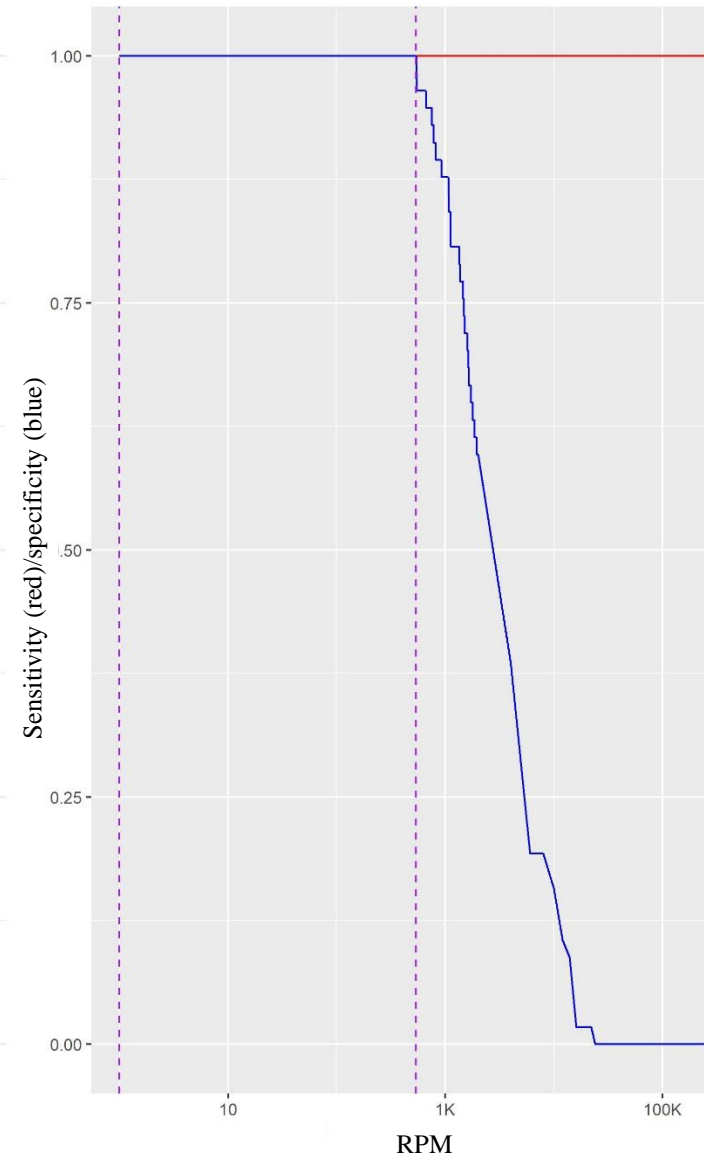

Figure S11

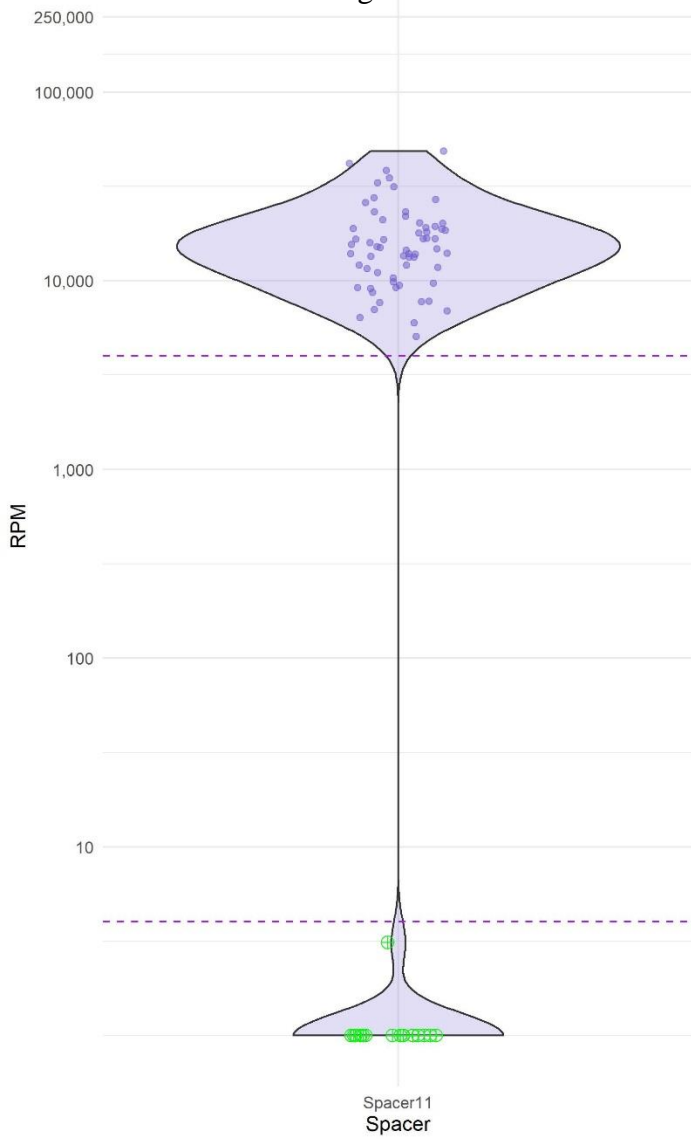

MutScan Spacer11

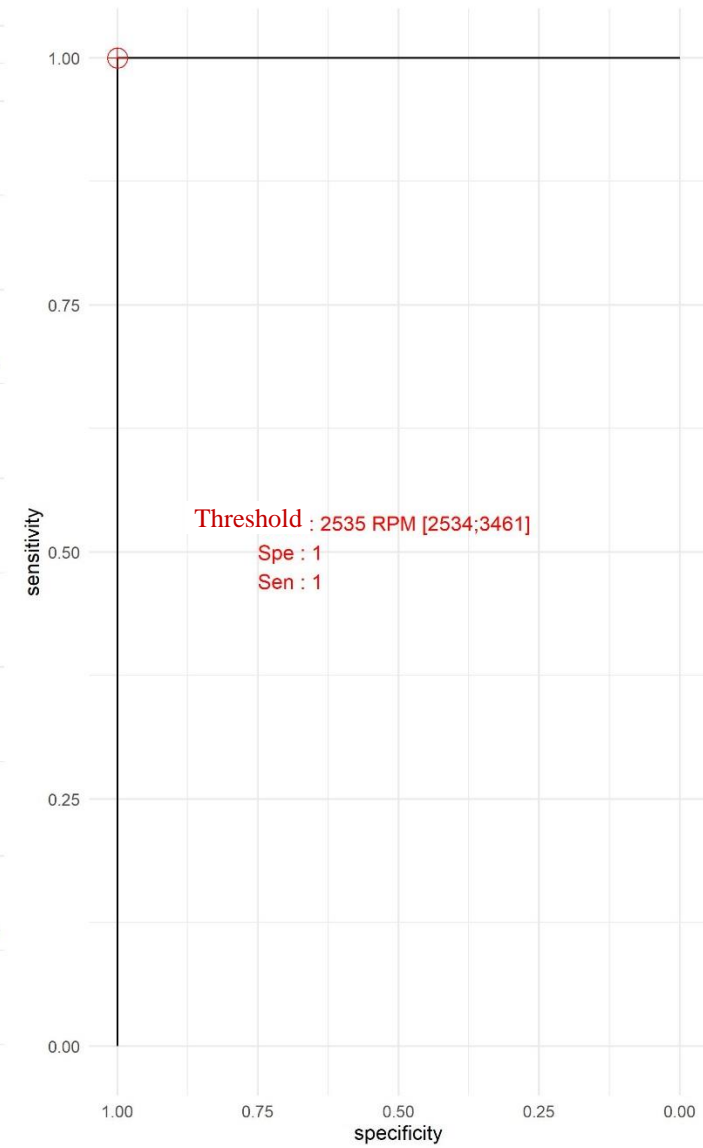

Threshold : [4;4000]

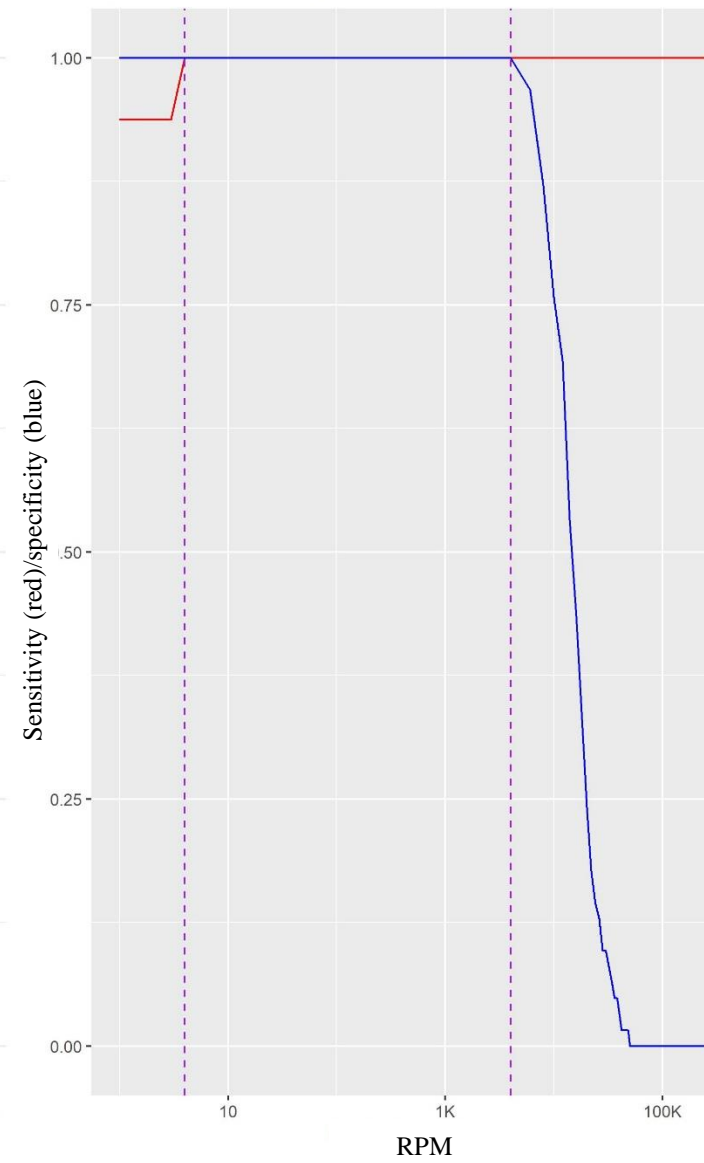

Figure S12

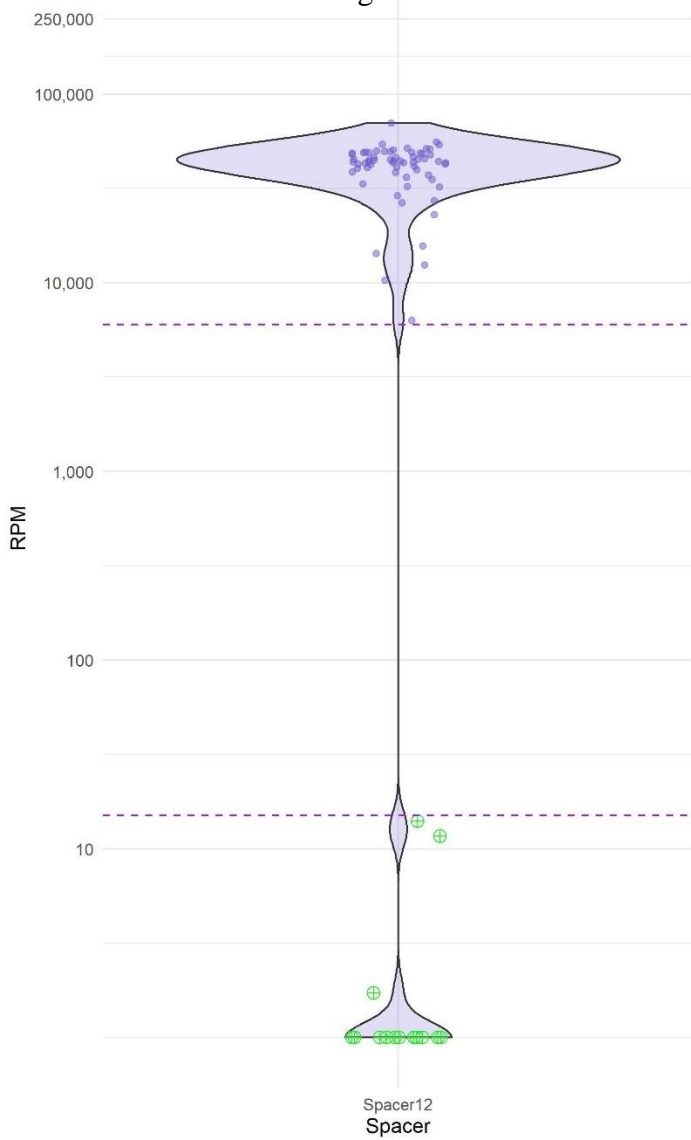

MutScan Spacer12

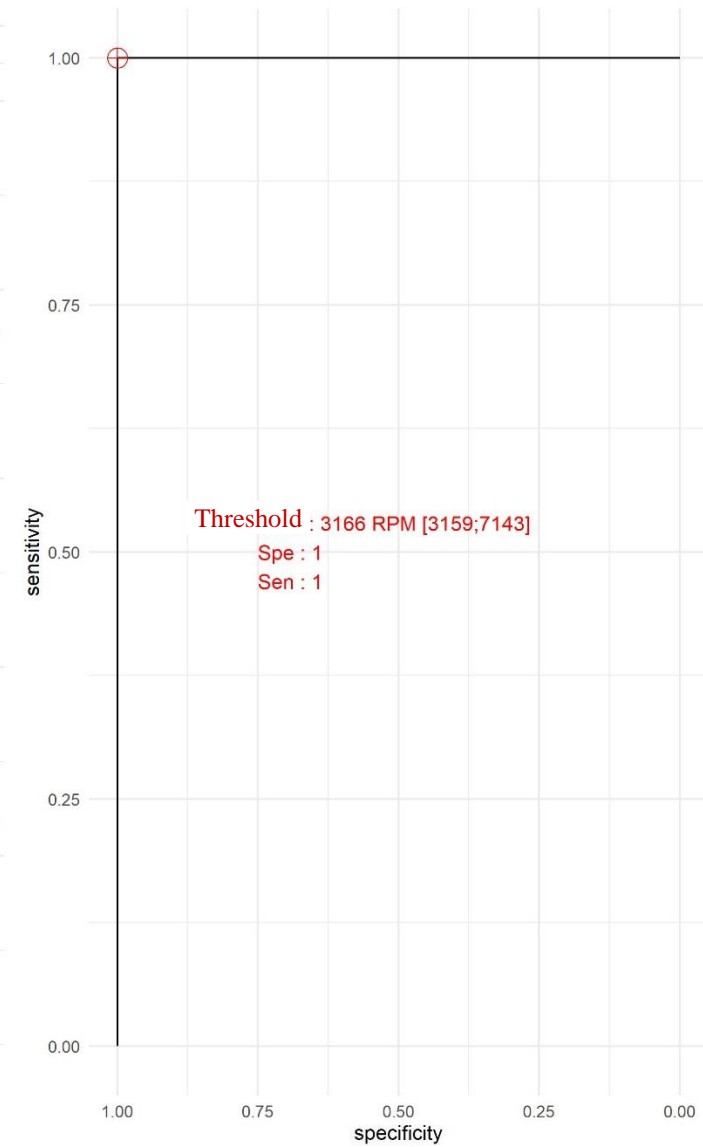

Threshold : [15;6000]

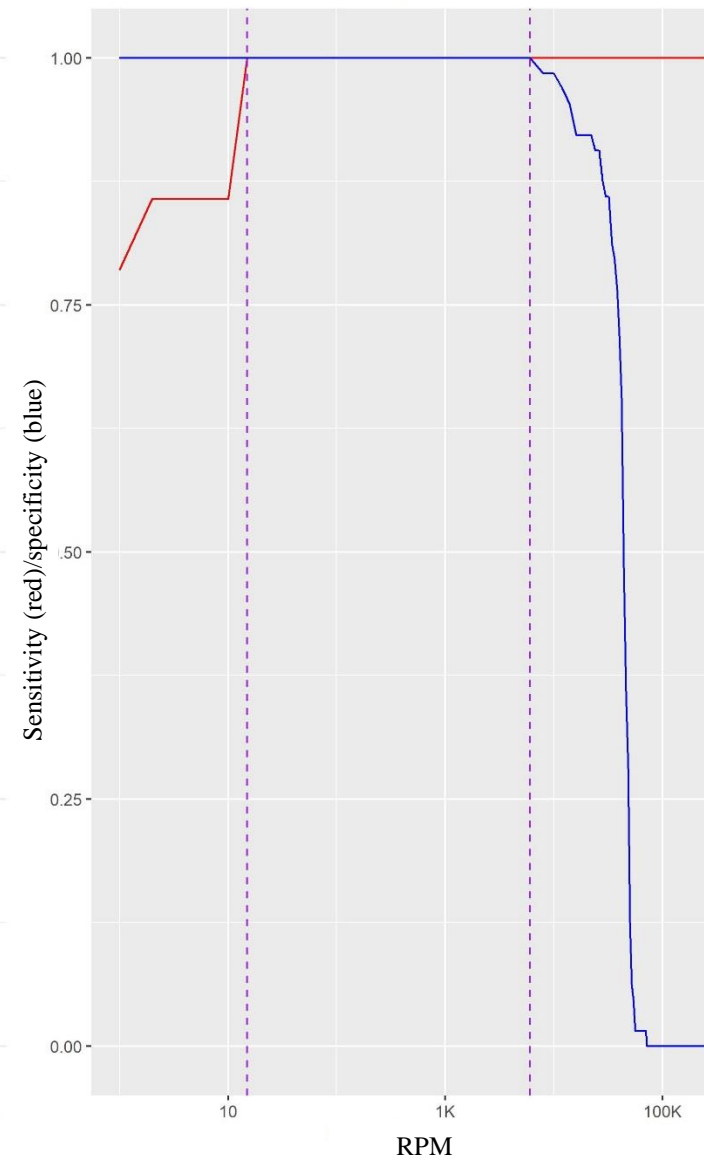

Figure S13

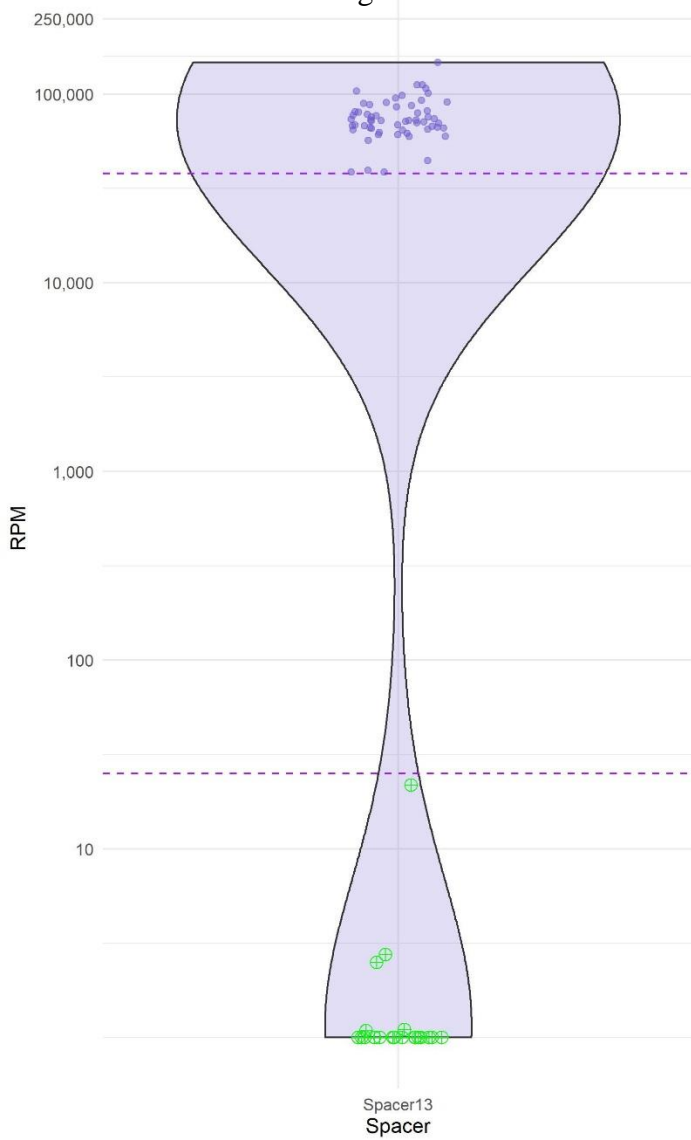

MutScan Spacer13

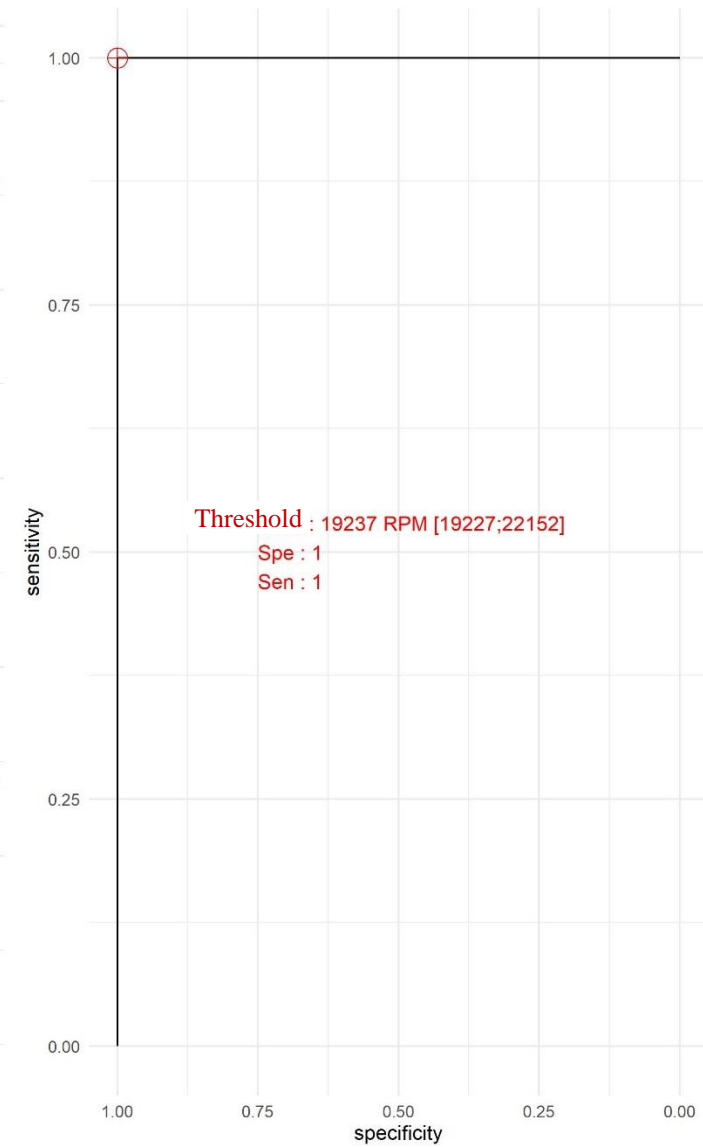

Threshold : [25;38000]

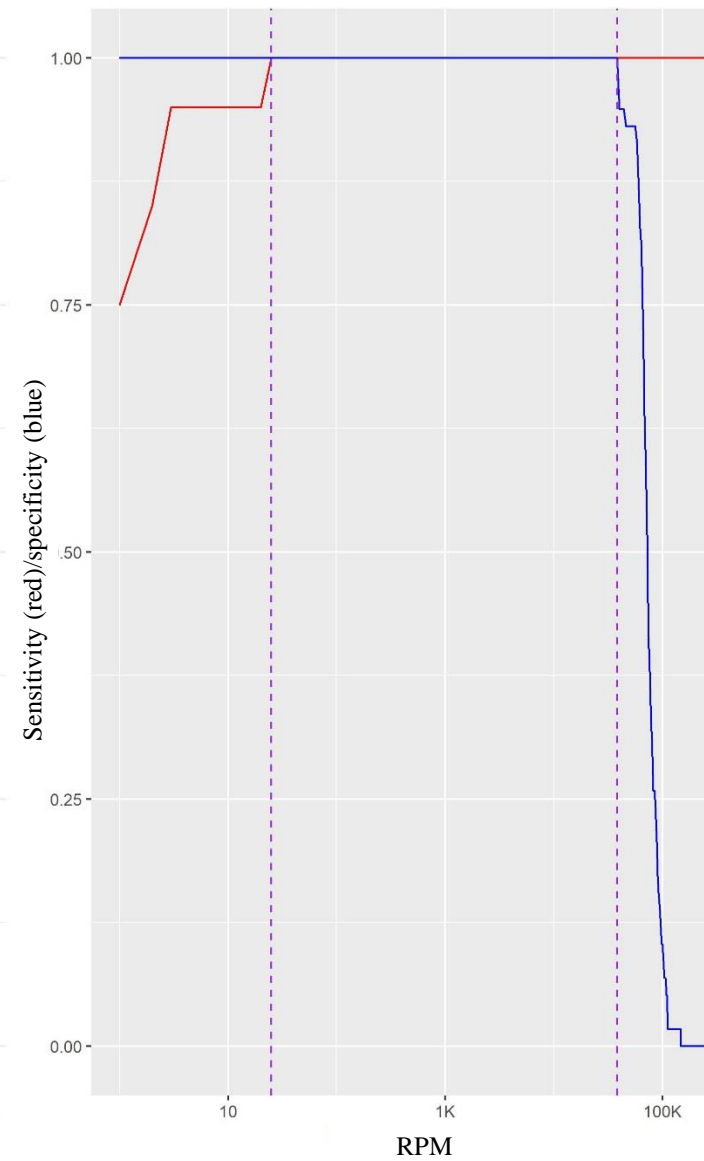

Figure S14

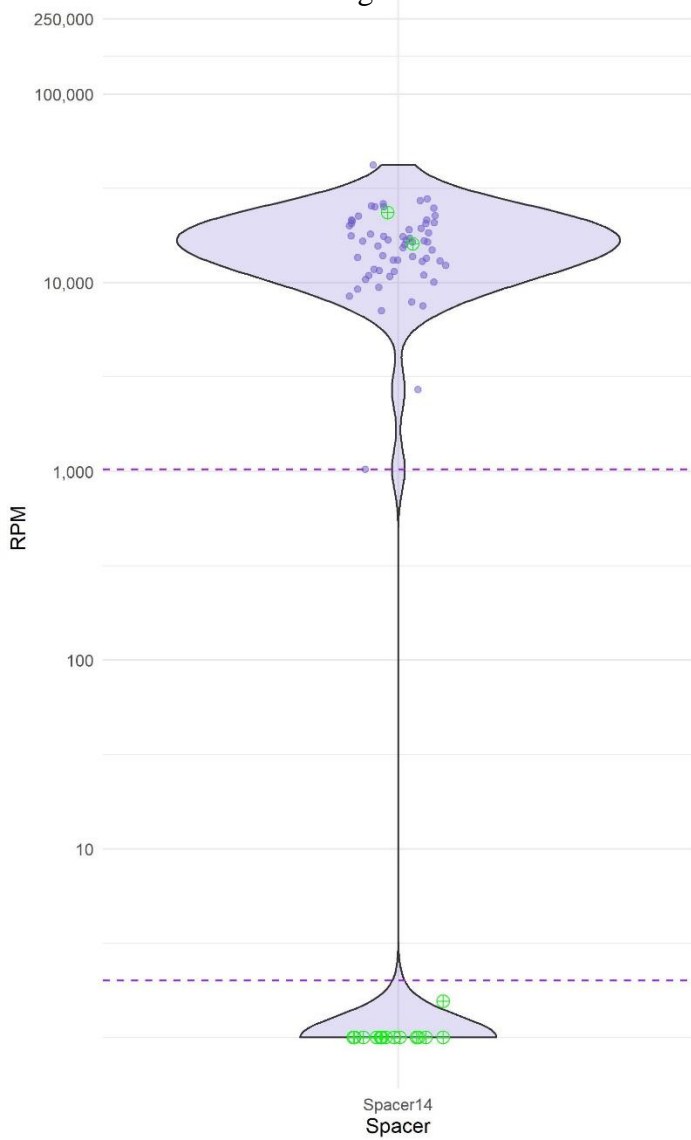

MutScan Spacer14

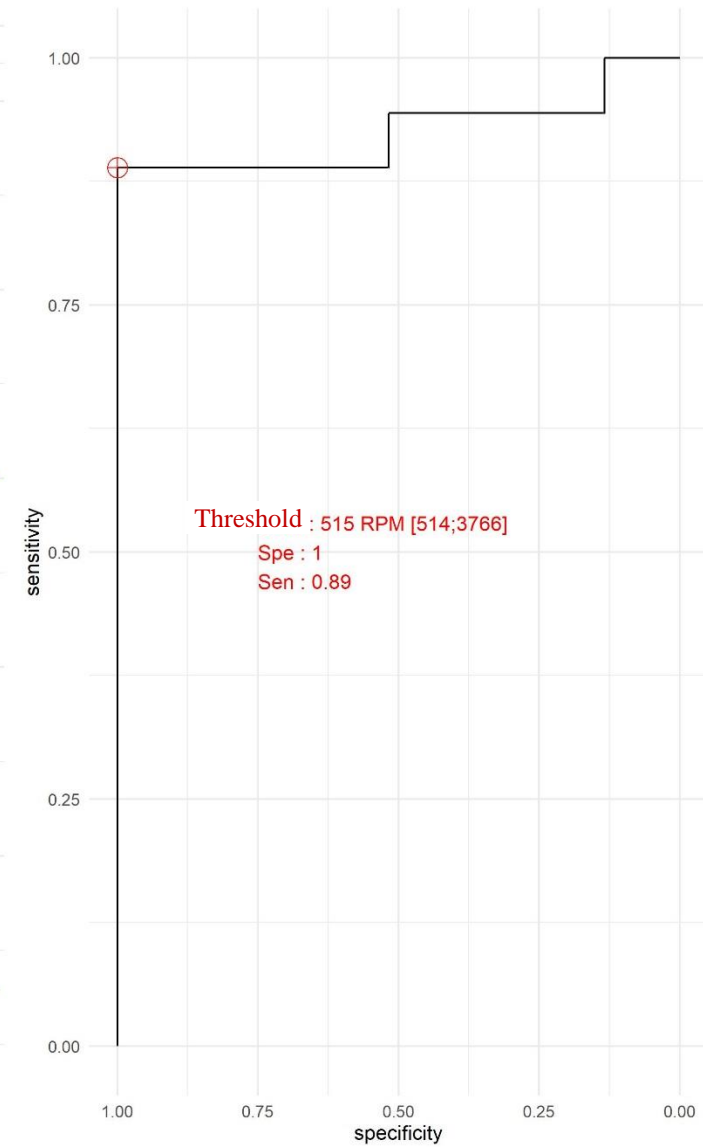

Threshold : [2;1025]

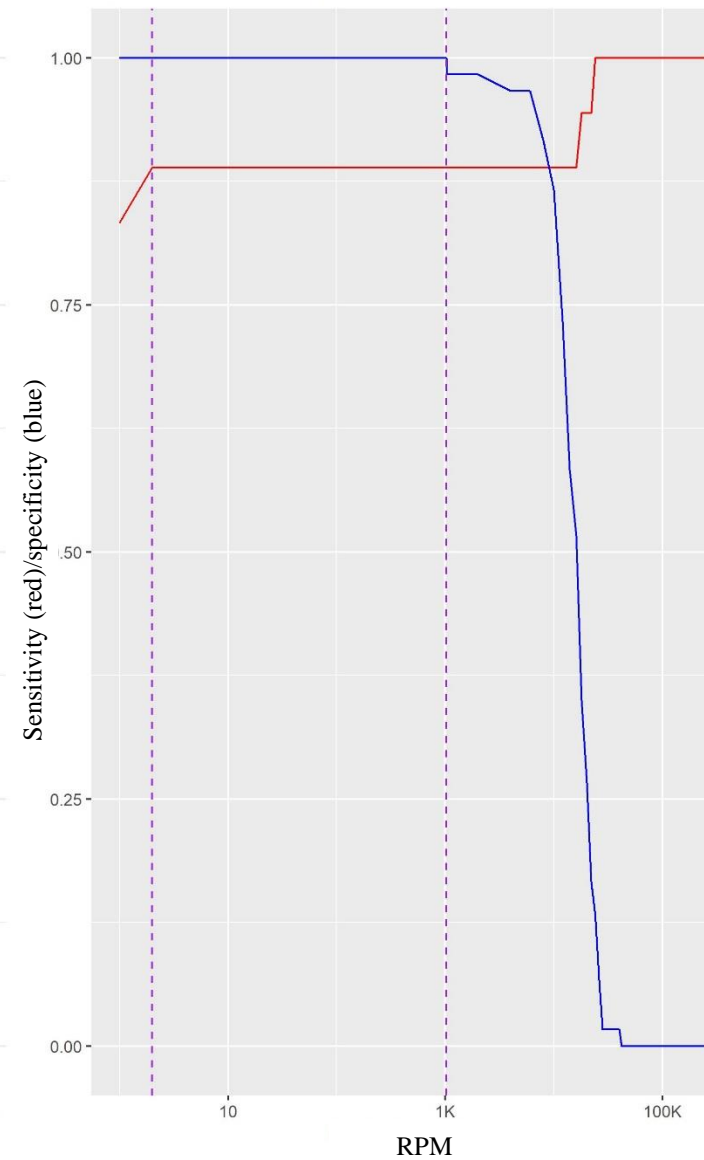

Figure S15

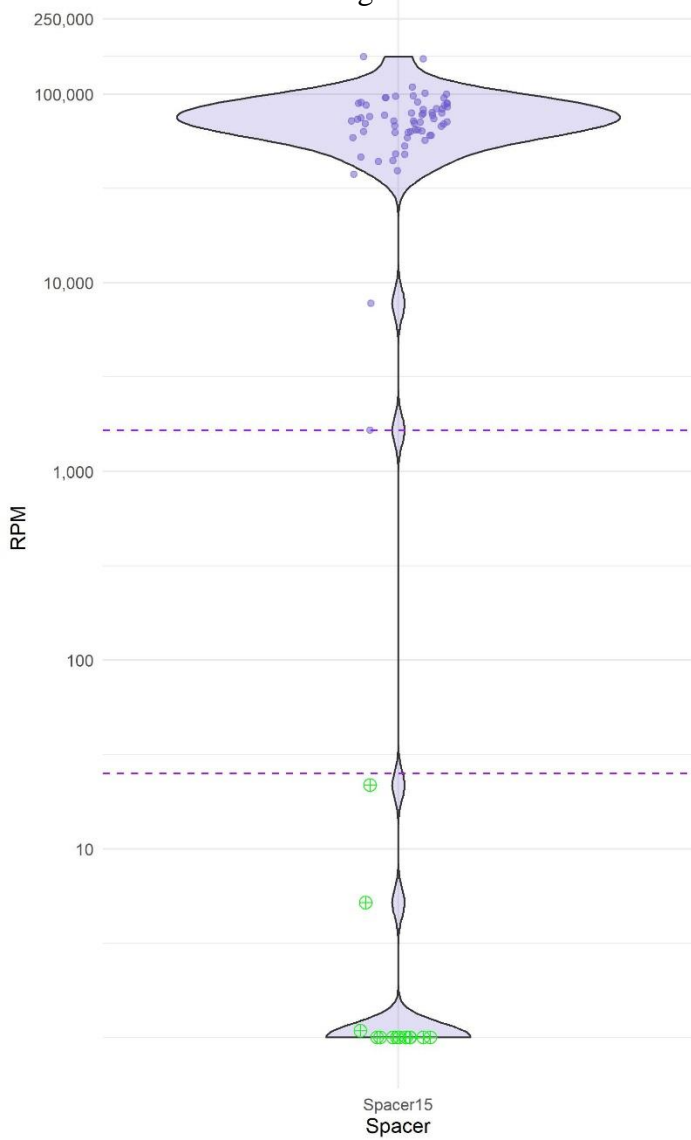

MutScan Spacer15

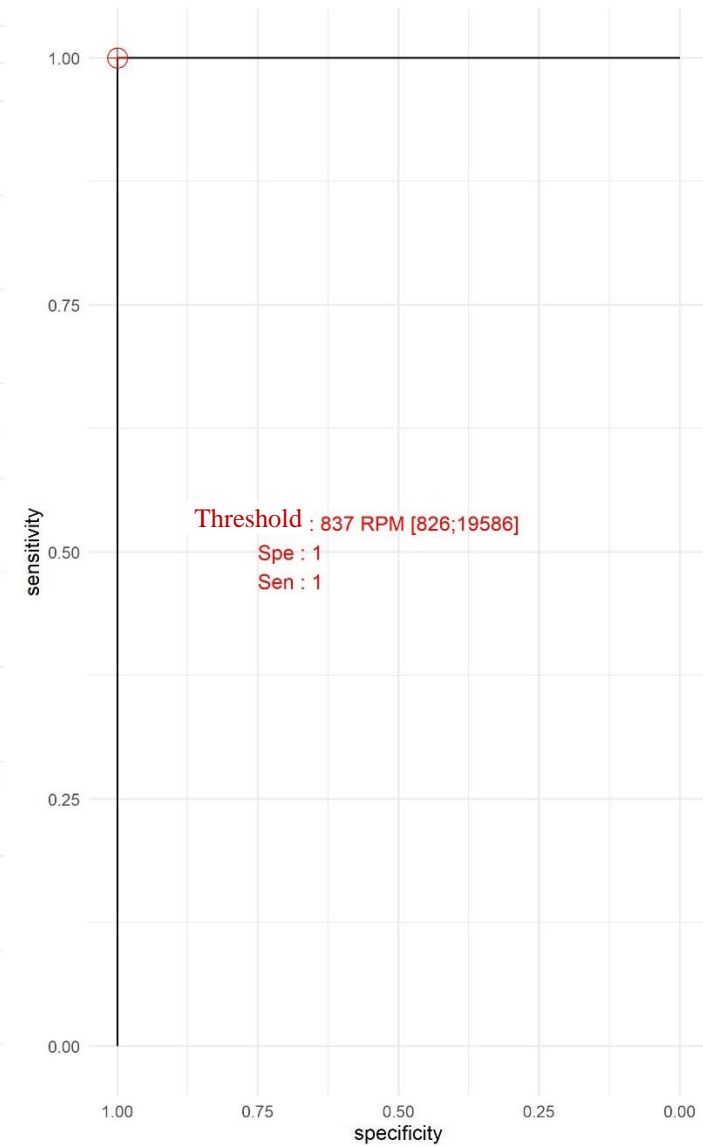

Threshold : [25;1650]

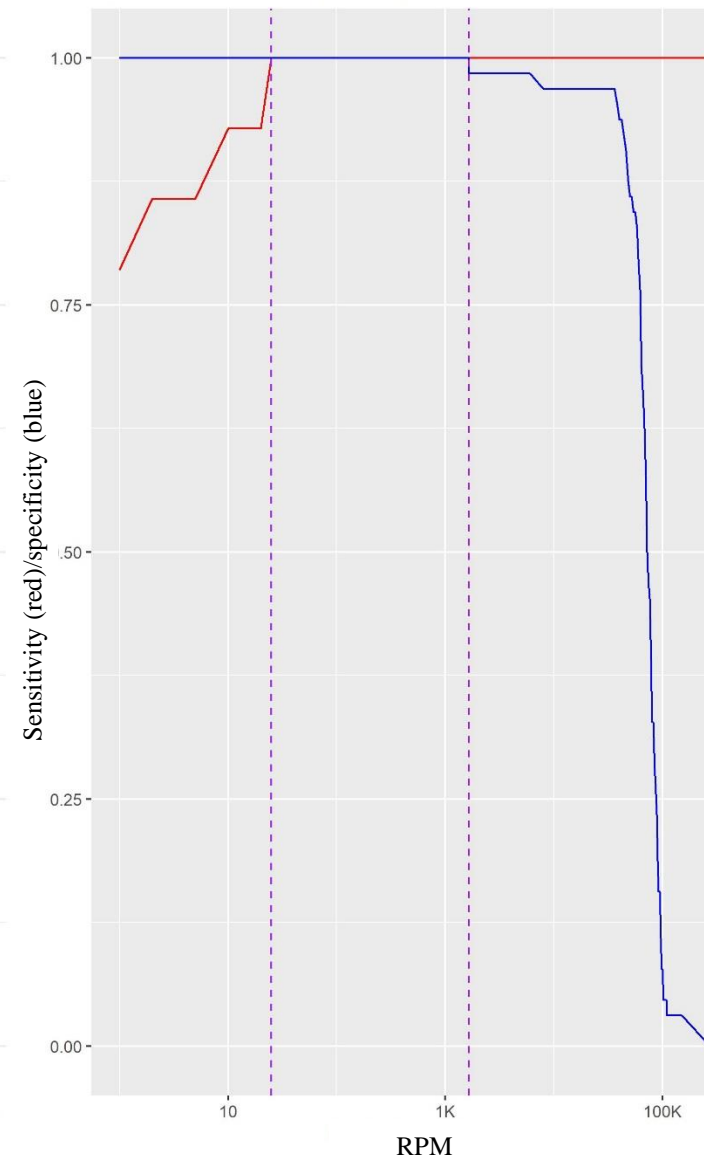



Figure S16

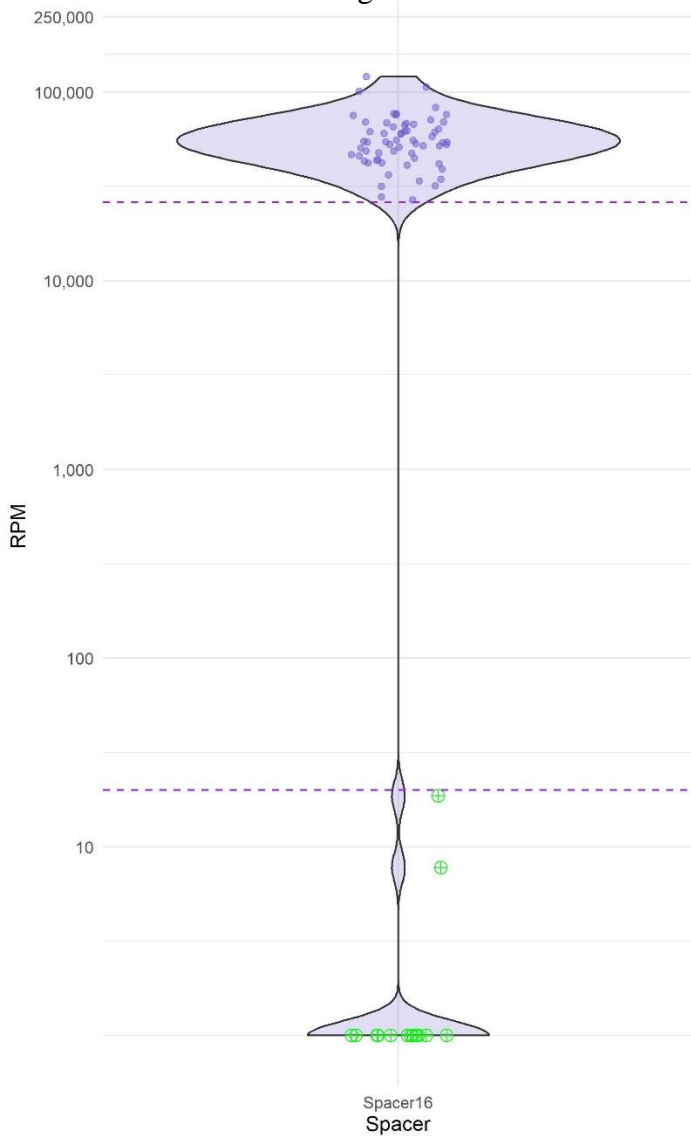

MutScan Spacer16

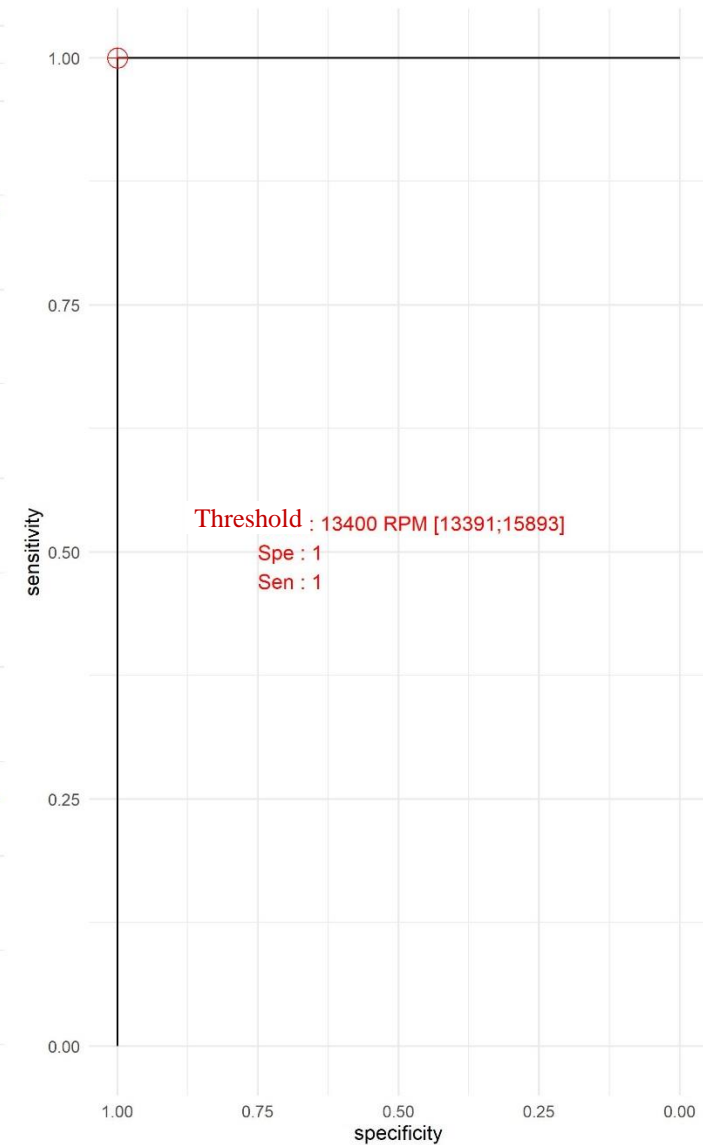

Threshold : [20;26000]

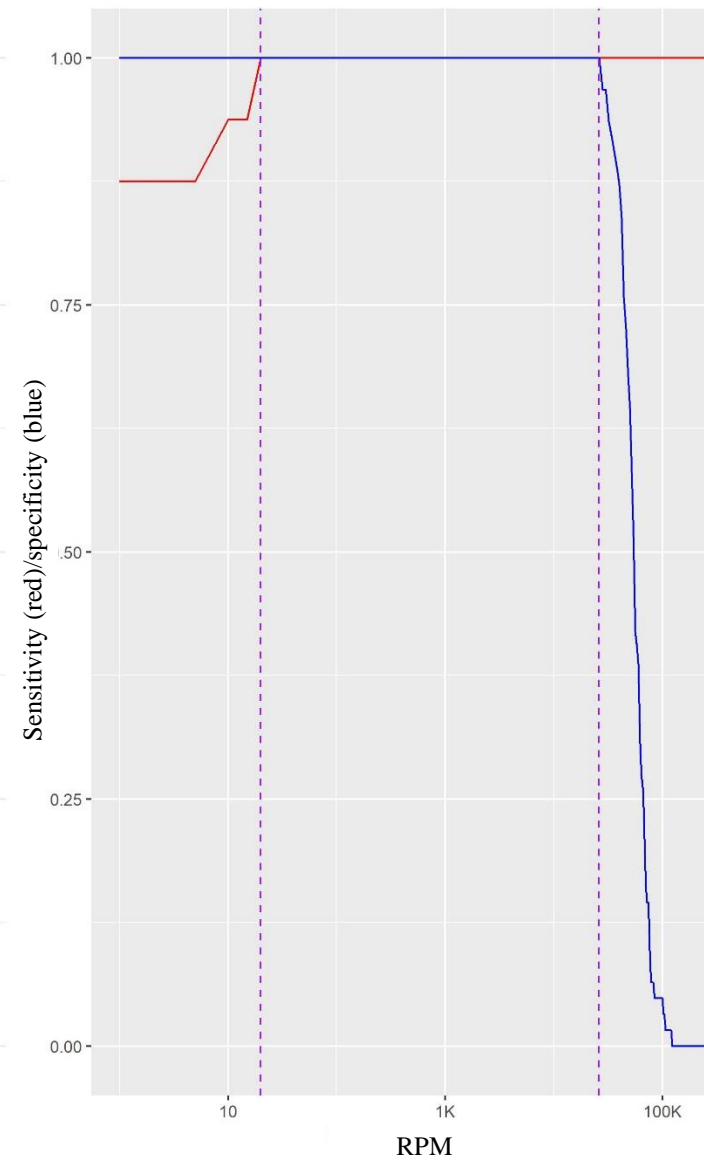

Figure S17

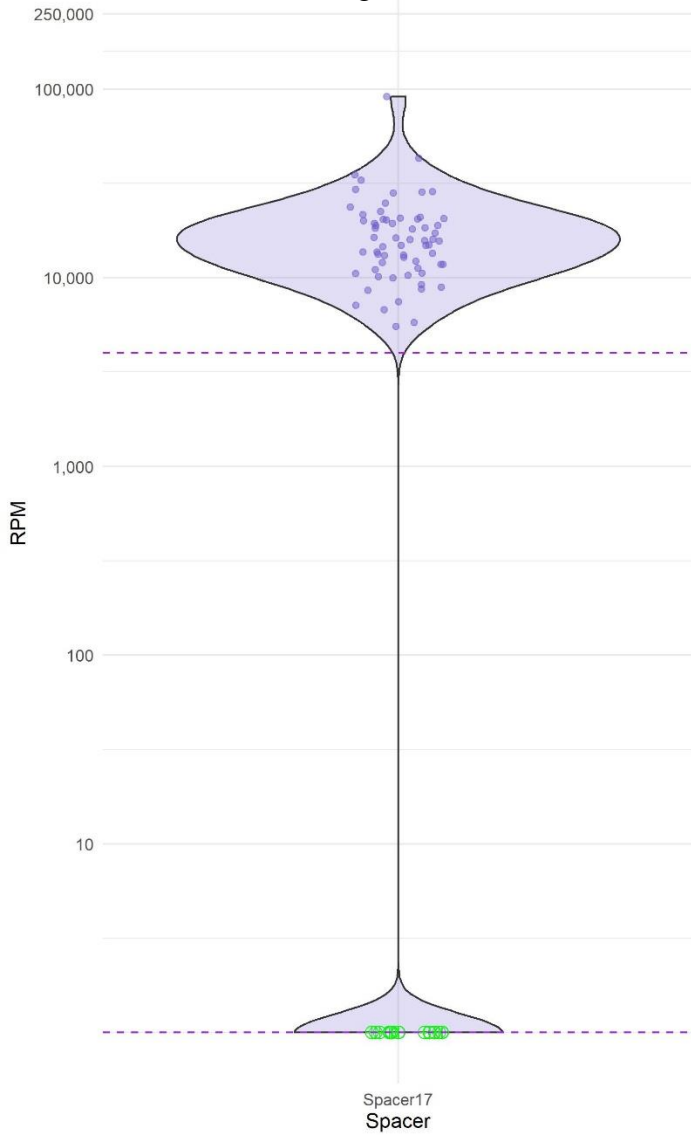

MutScan Spacer17

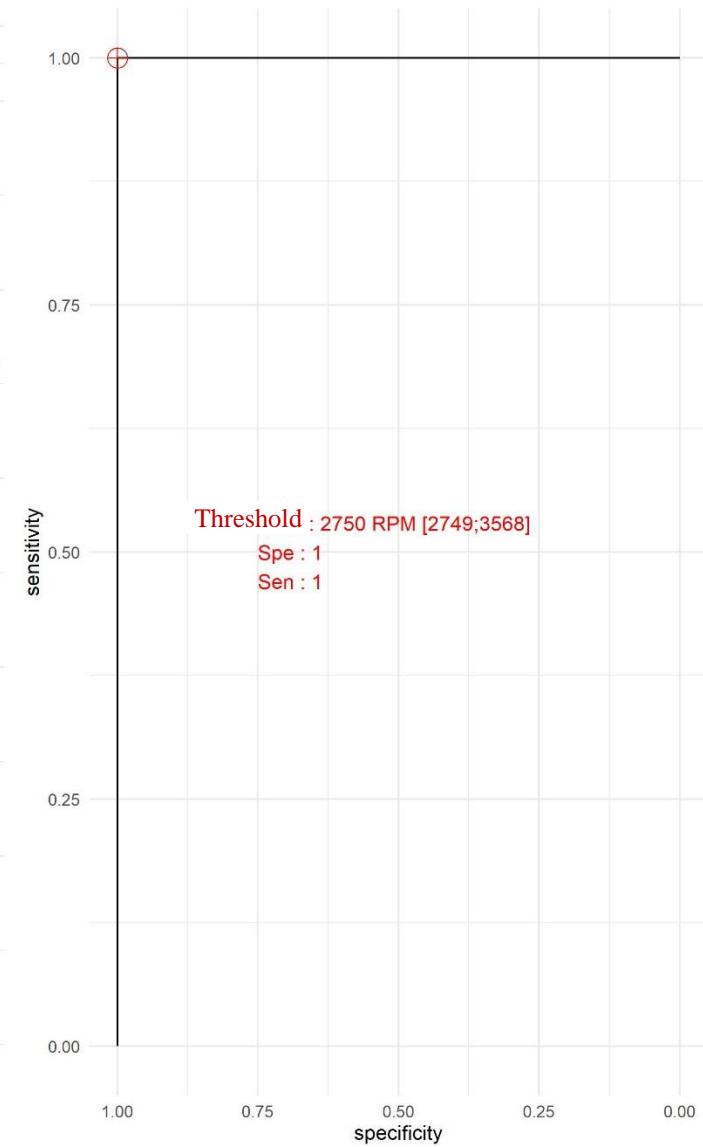

Threshold : [1;4000]

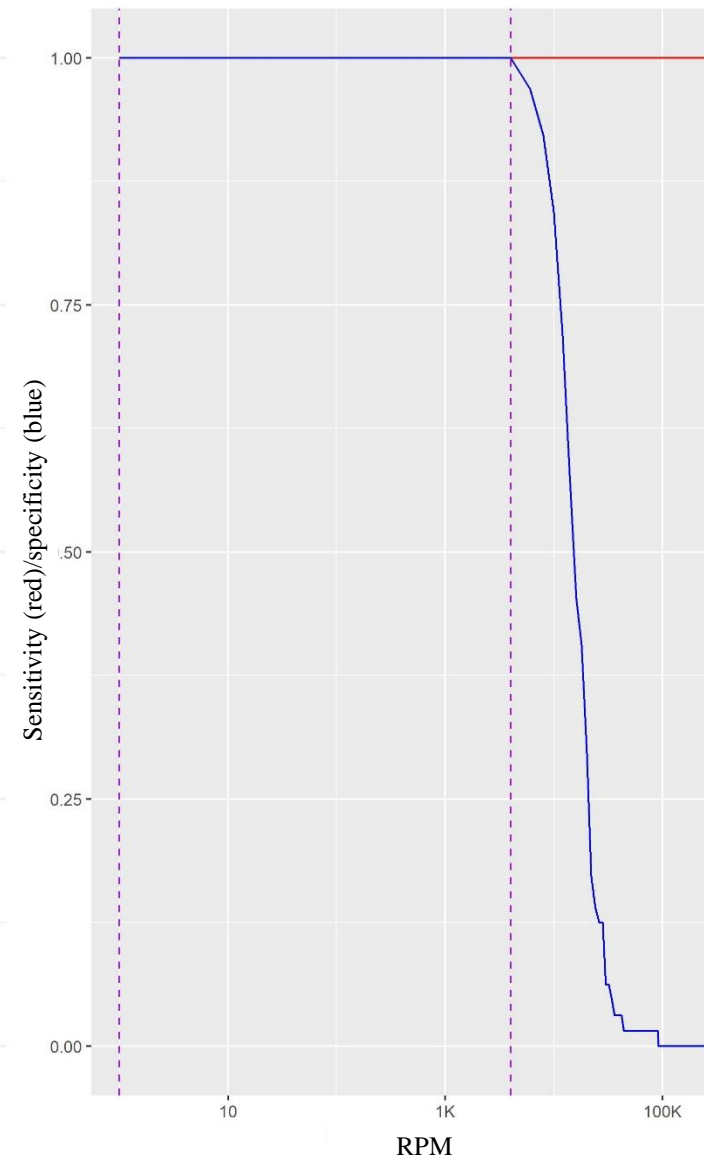

Figure S18

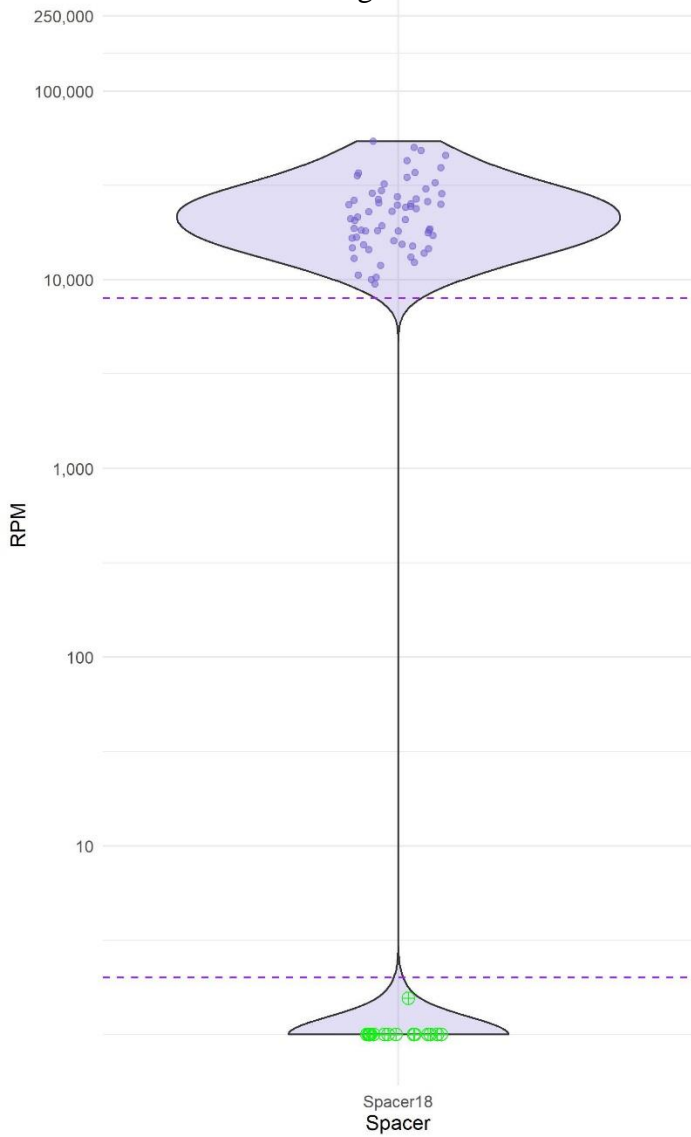

MutScan Spacer18

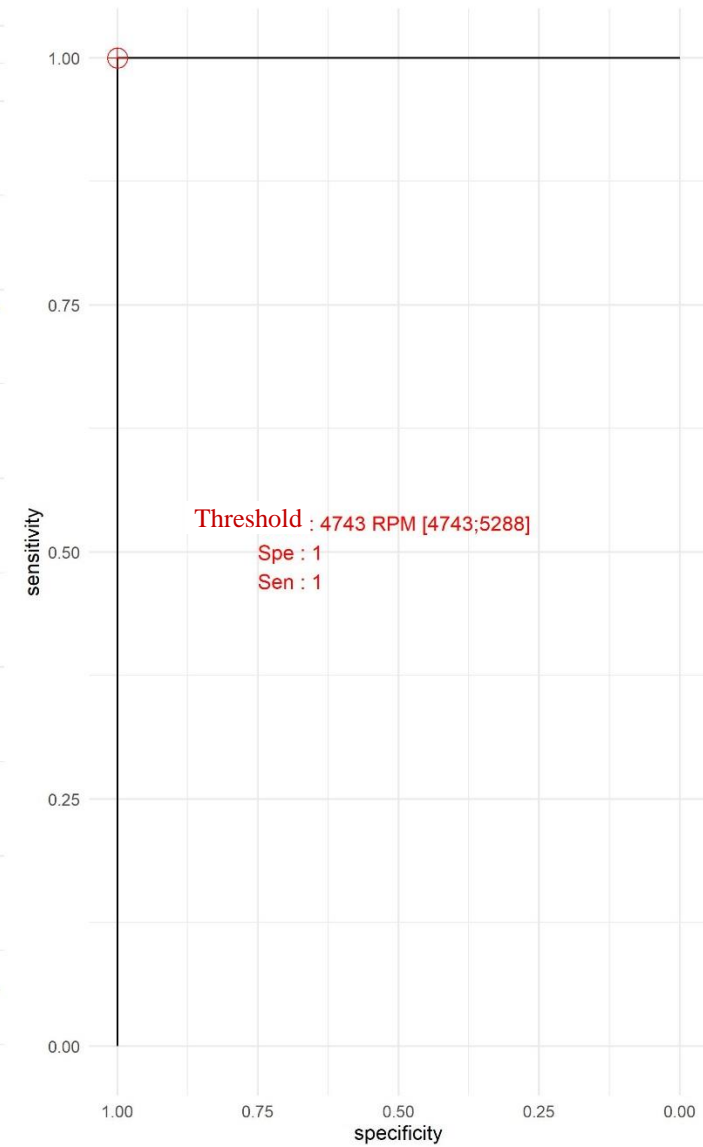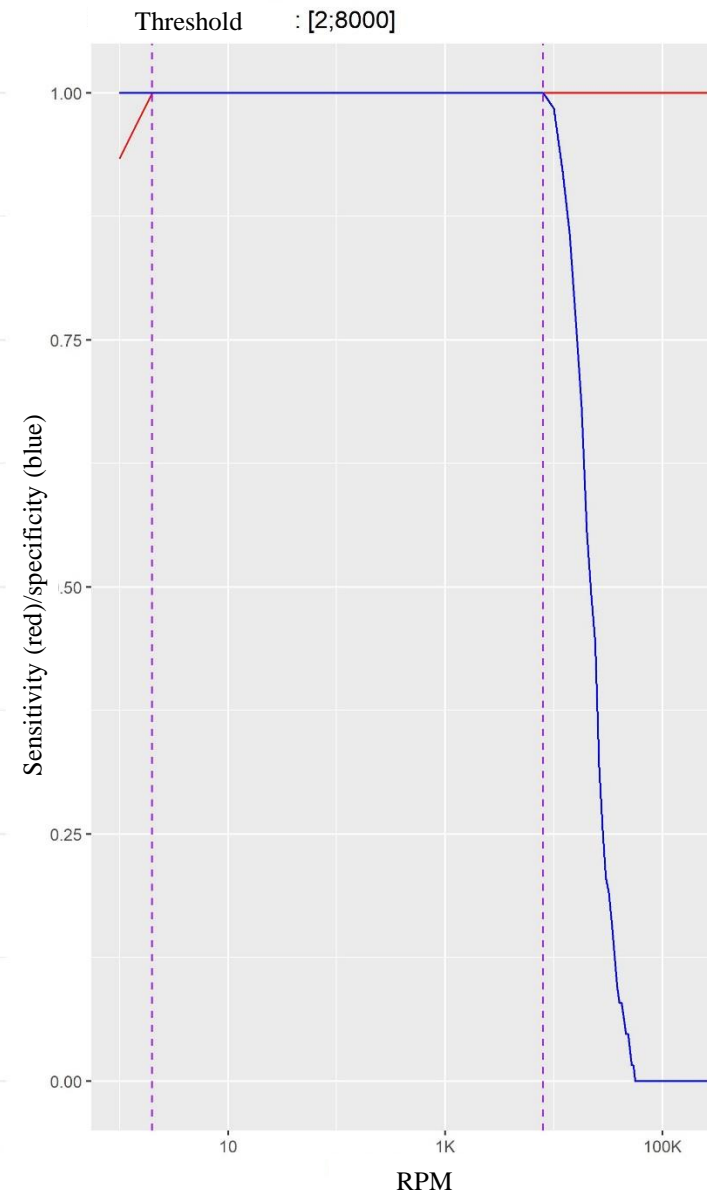

Figure S19

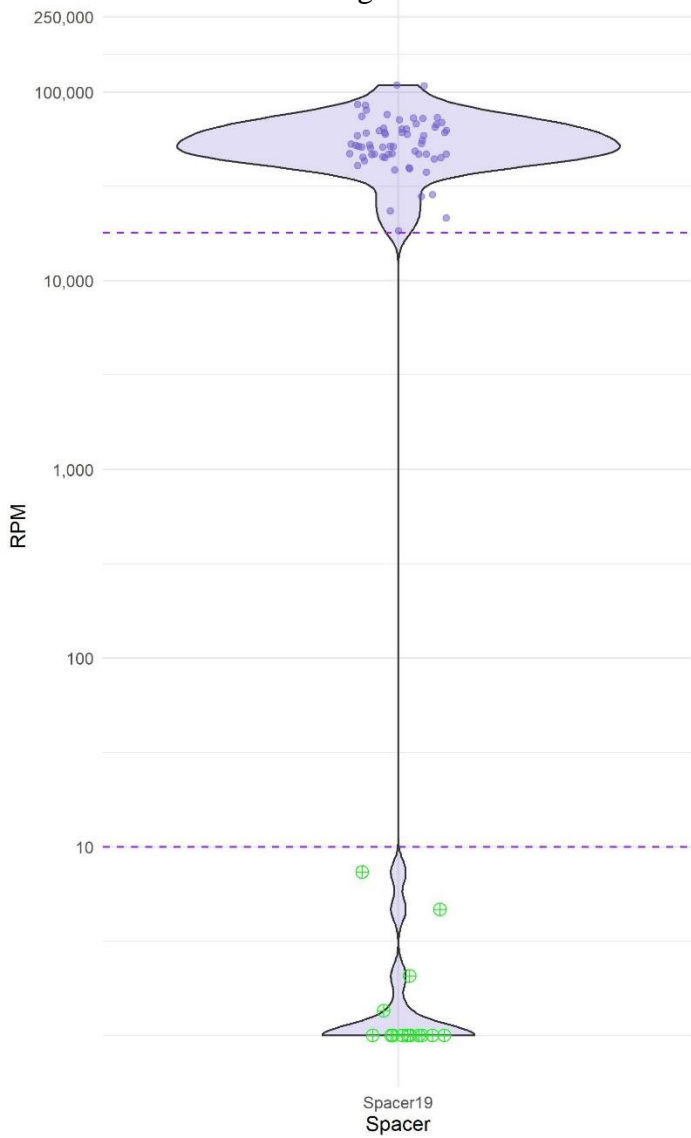

MutScan Spacer19

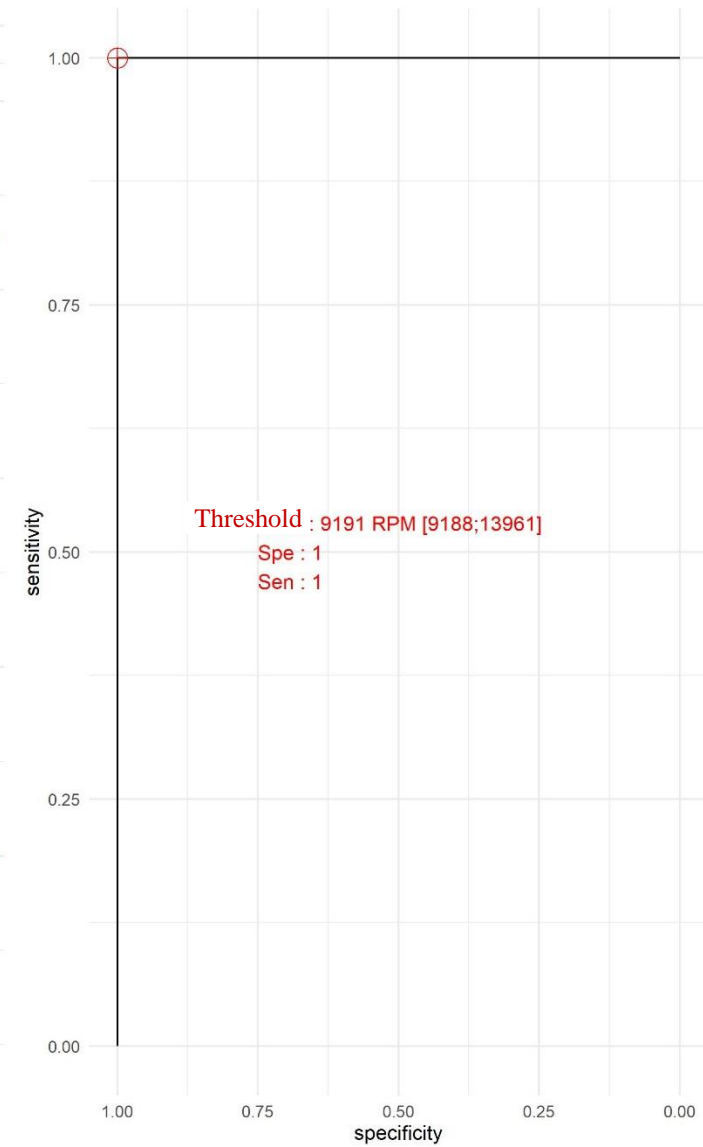

Threshold : [10;18000]

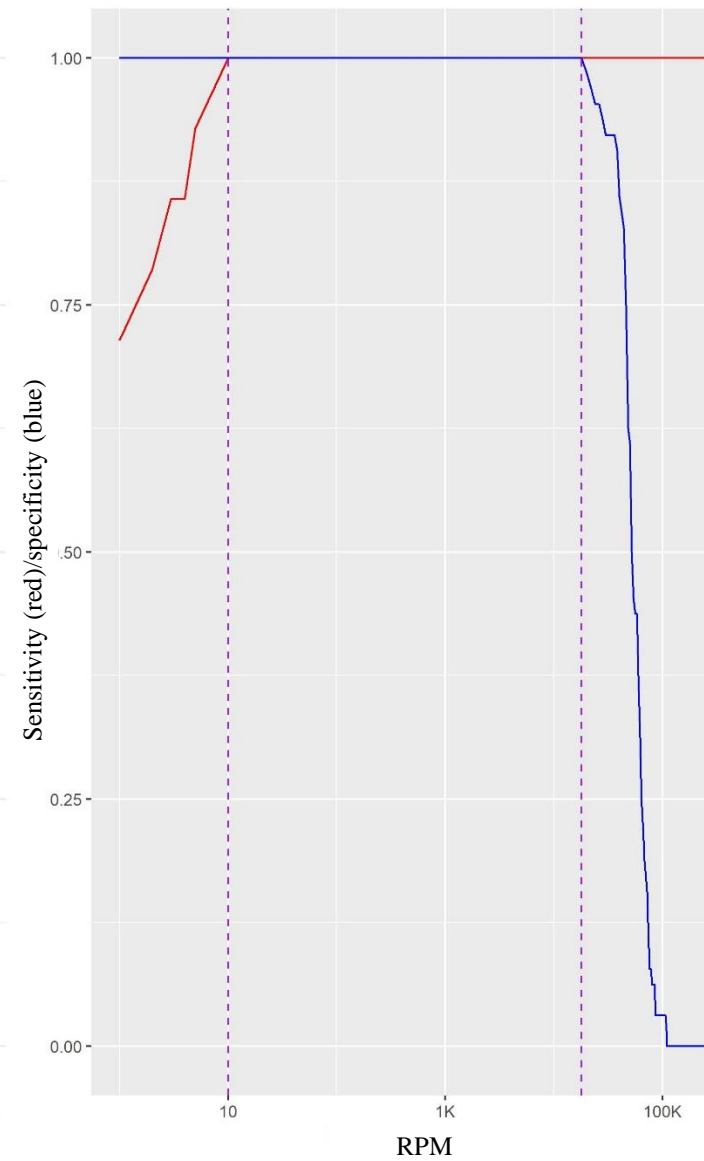

Figure S20

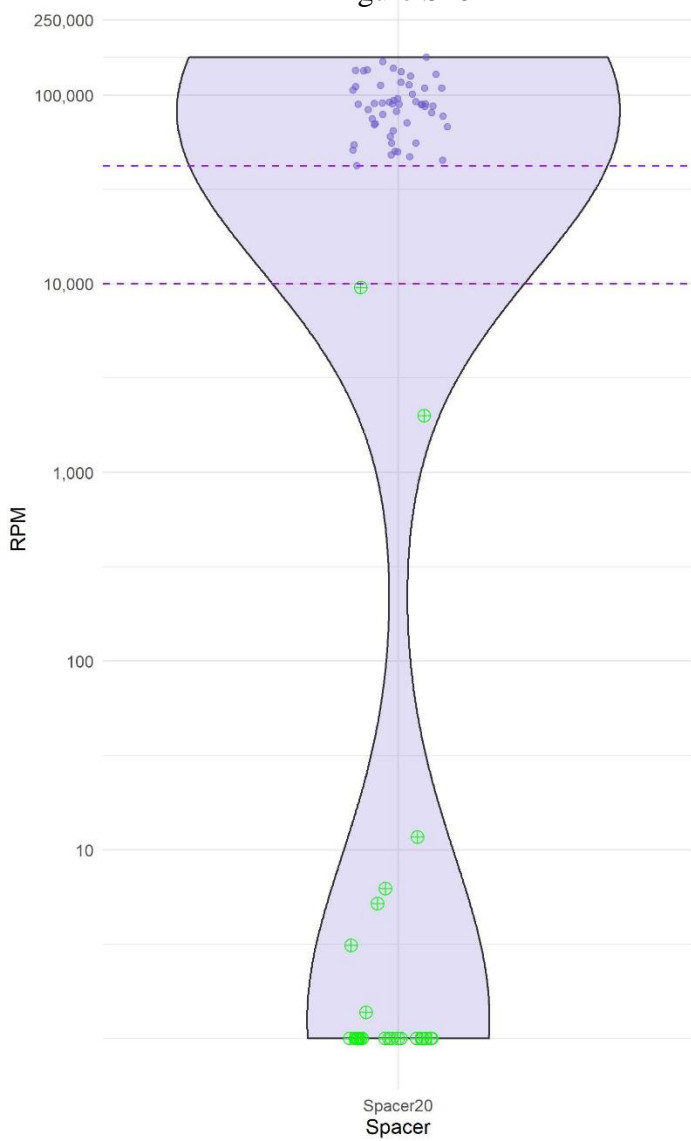

MutScan Spacer20

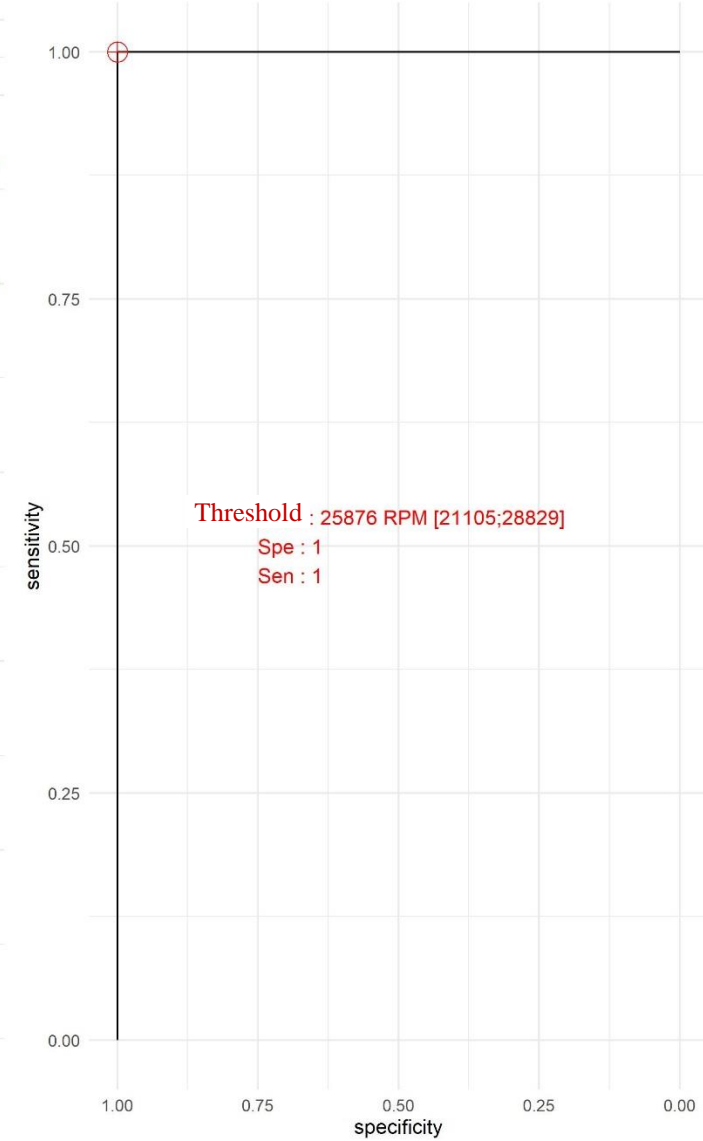

Threshold : [10000;42000]

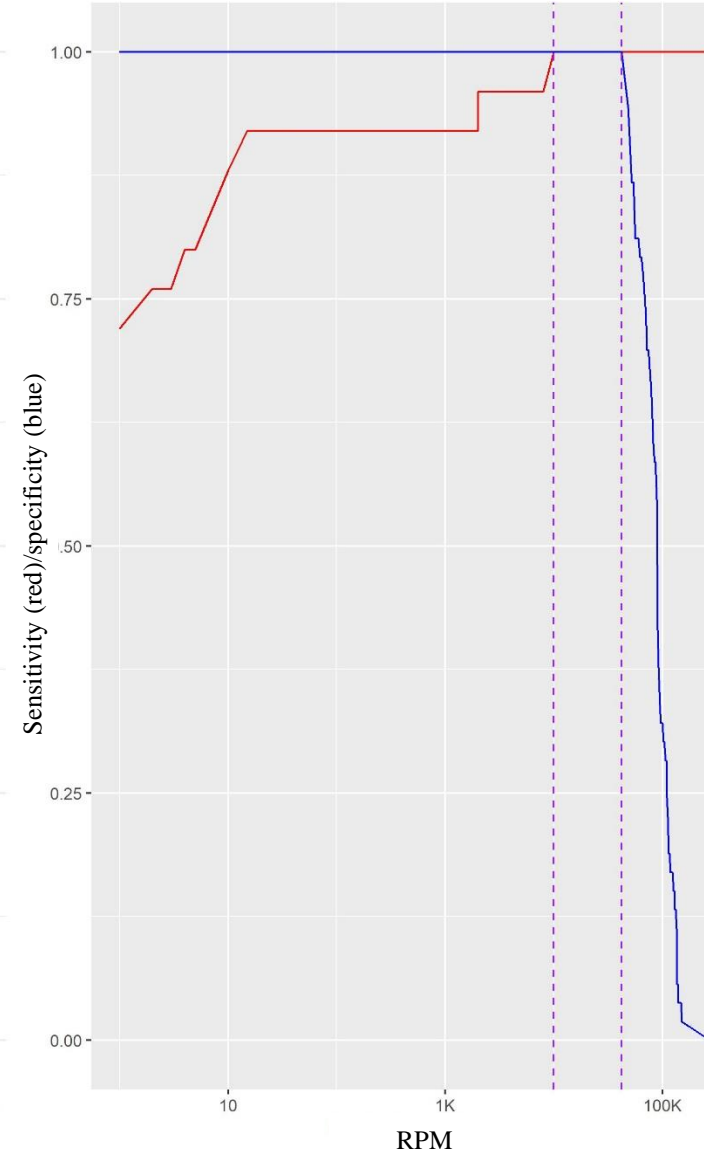

Figure S21

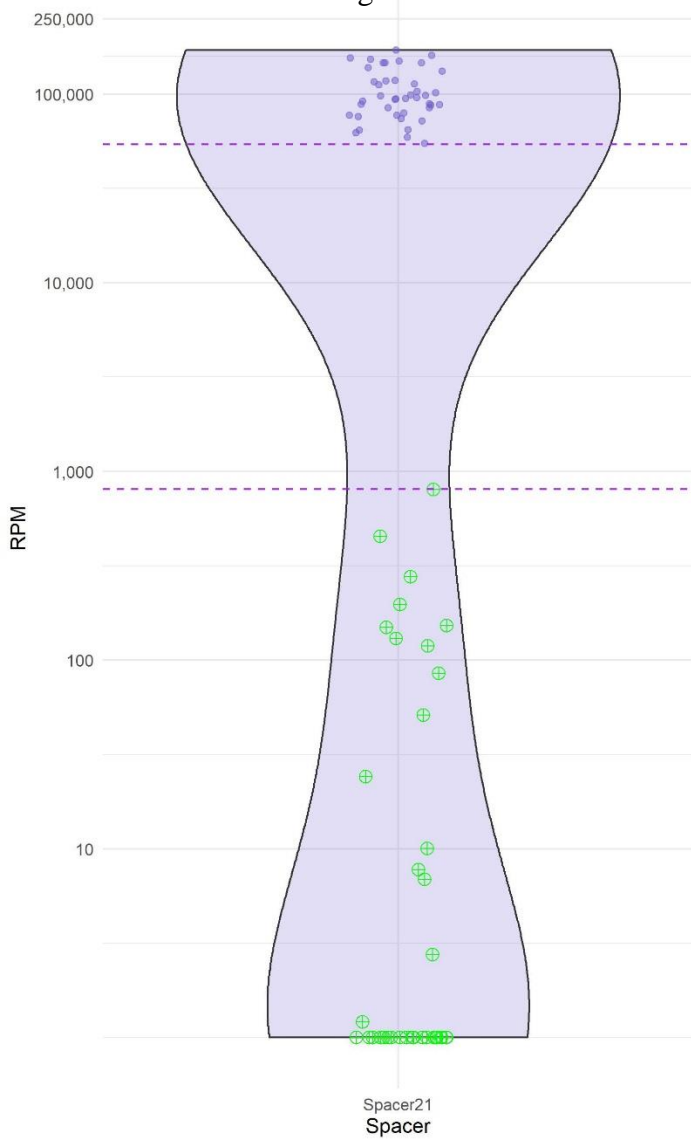

MutScan Spacer21

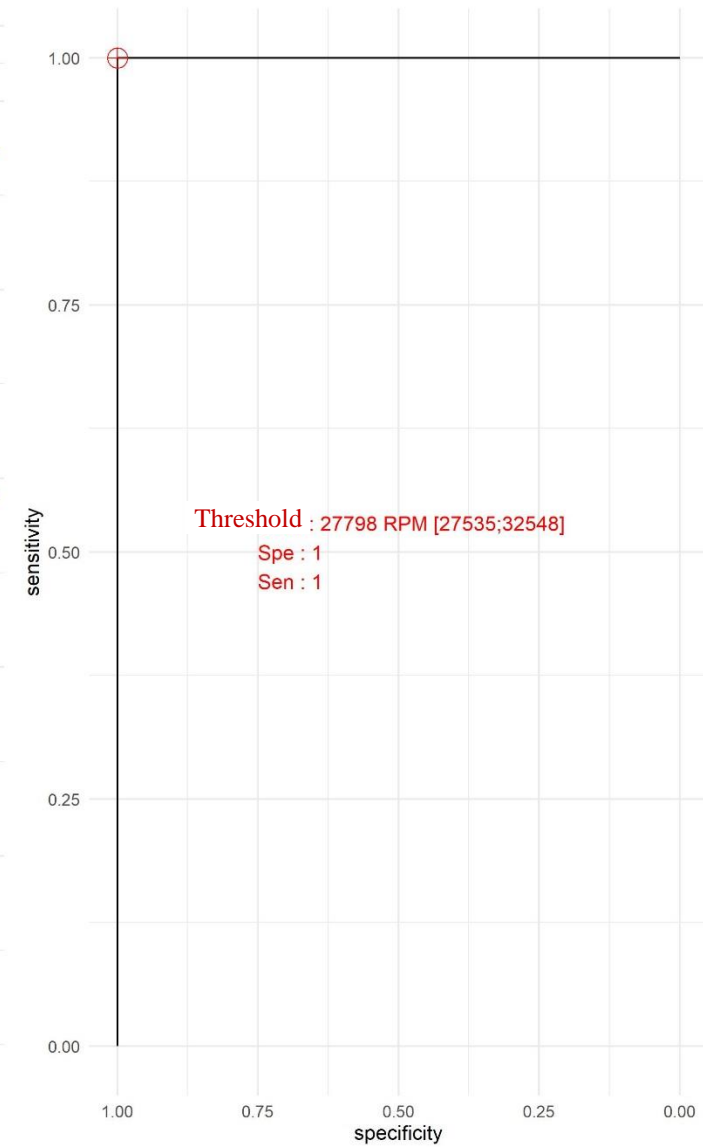

Threshold : [805;54000]

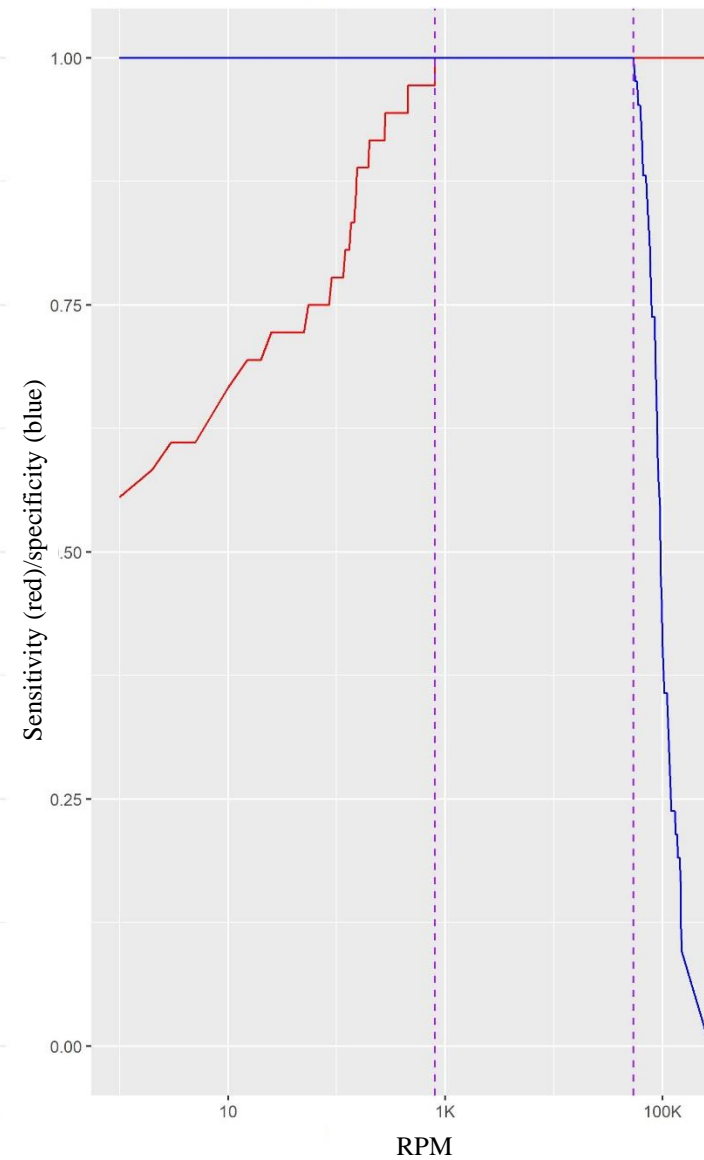

Figure S22

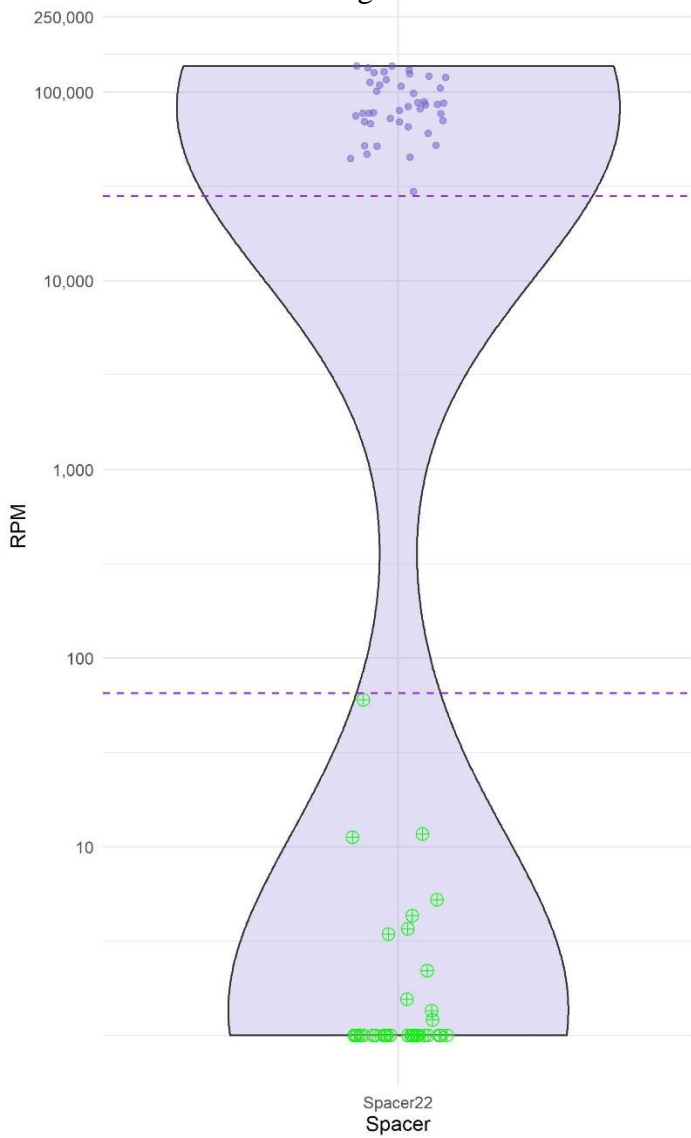

MutScan Spacer22

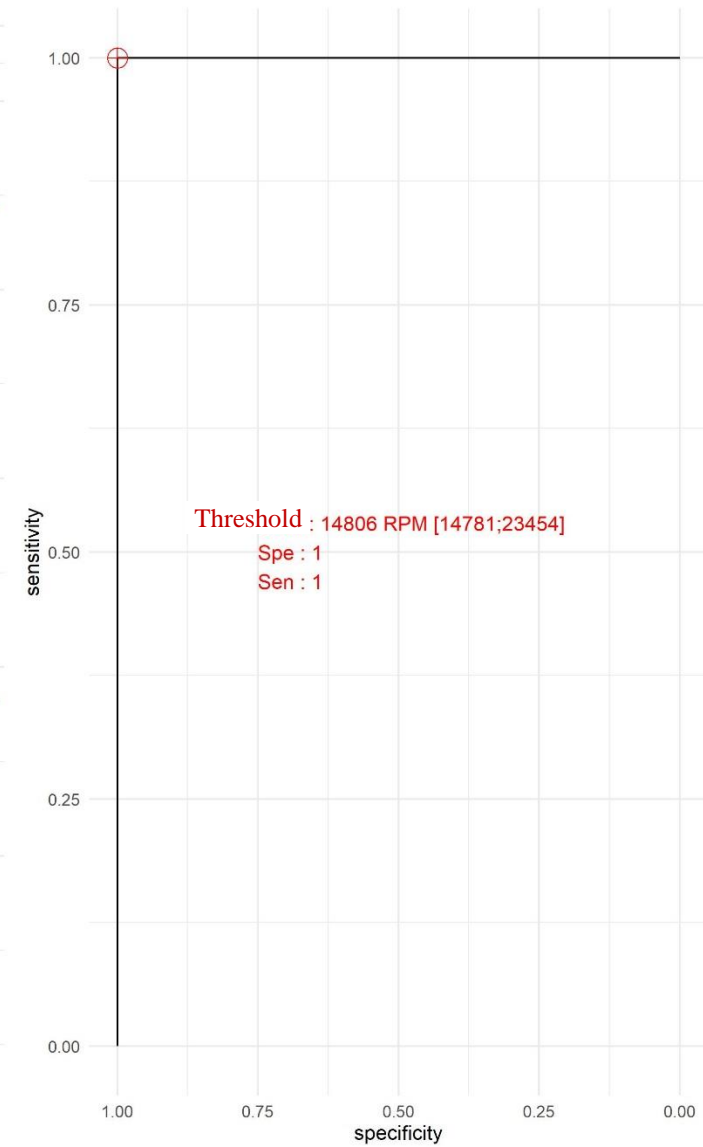

Threshold : [65;28000]

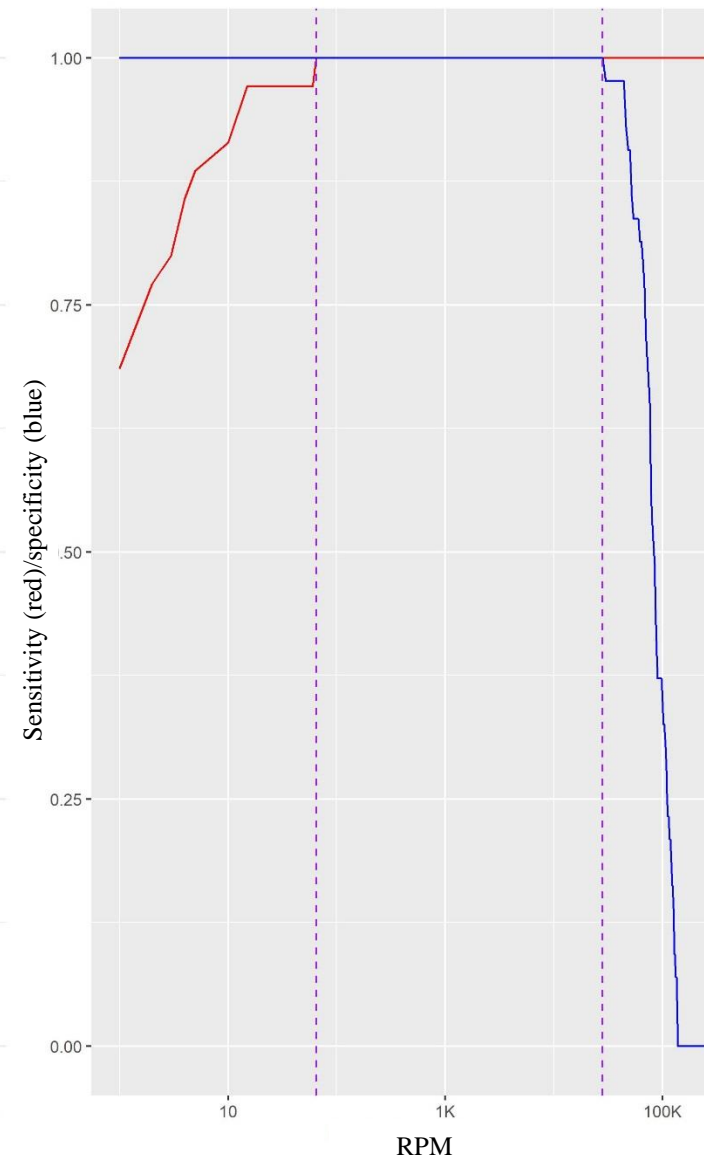

Figure S23

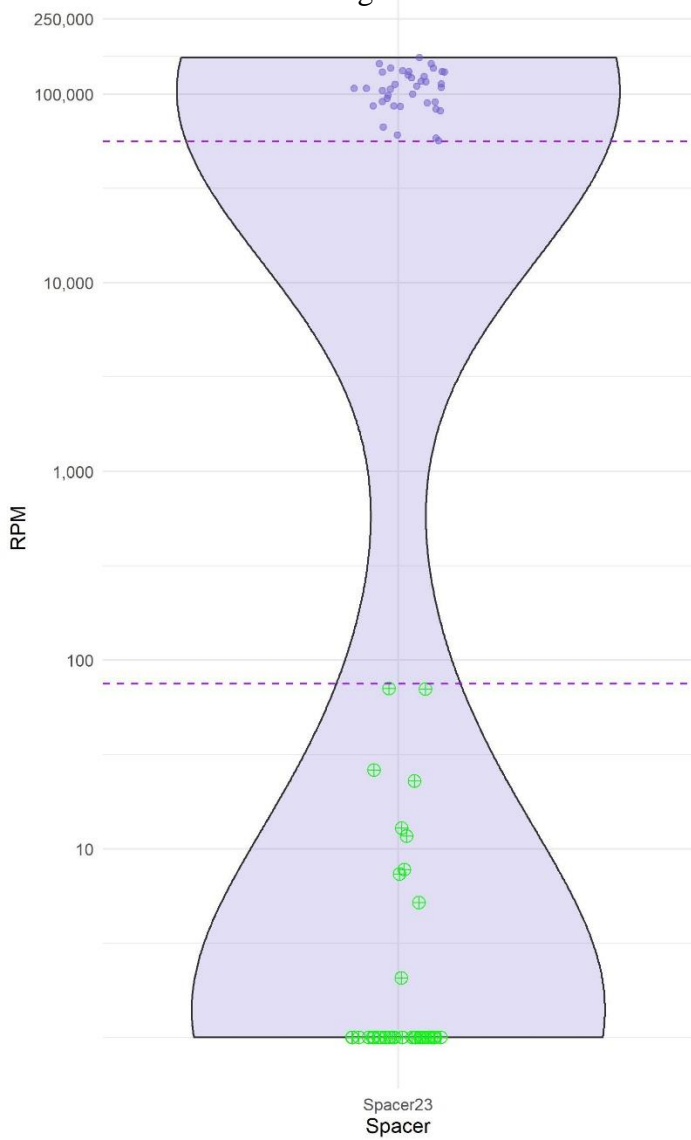

MutScan Spacer23

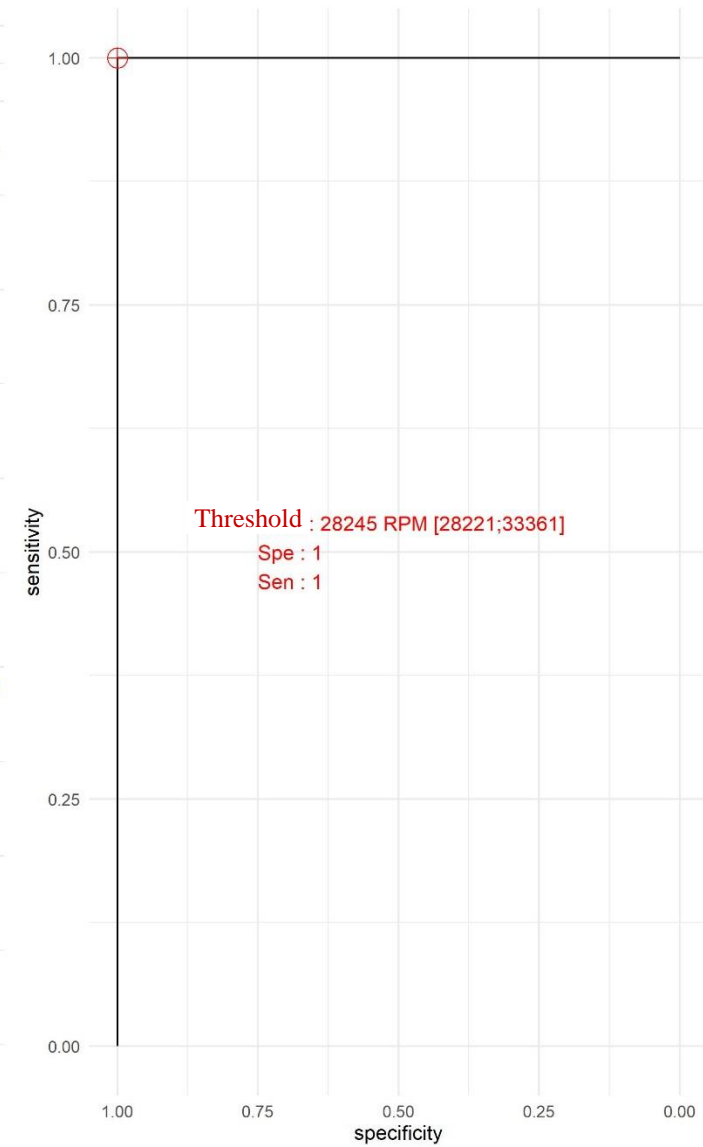

Threshold : [75;56000]

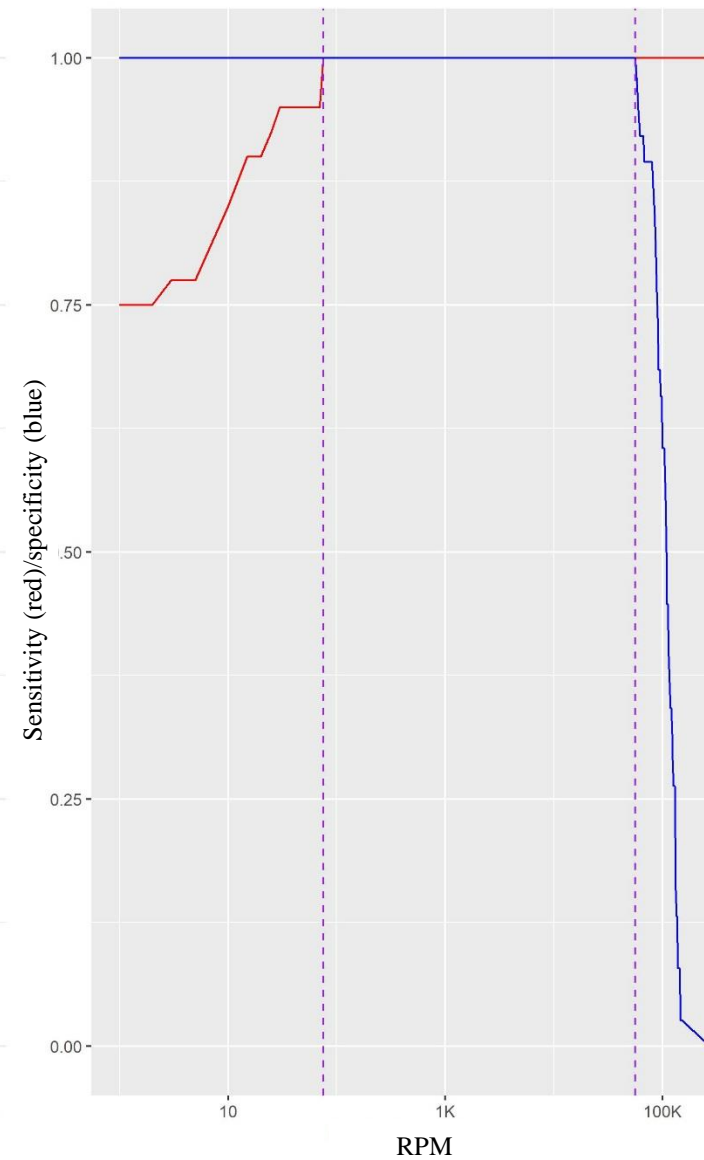



Figure S24

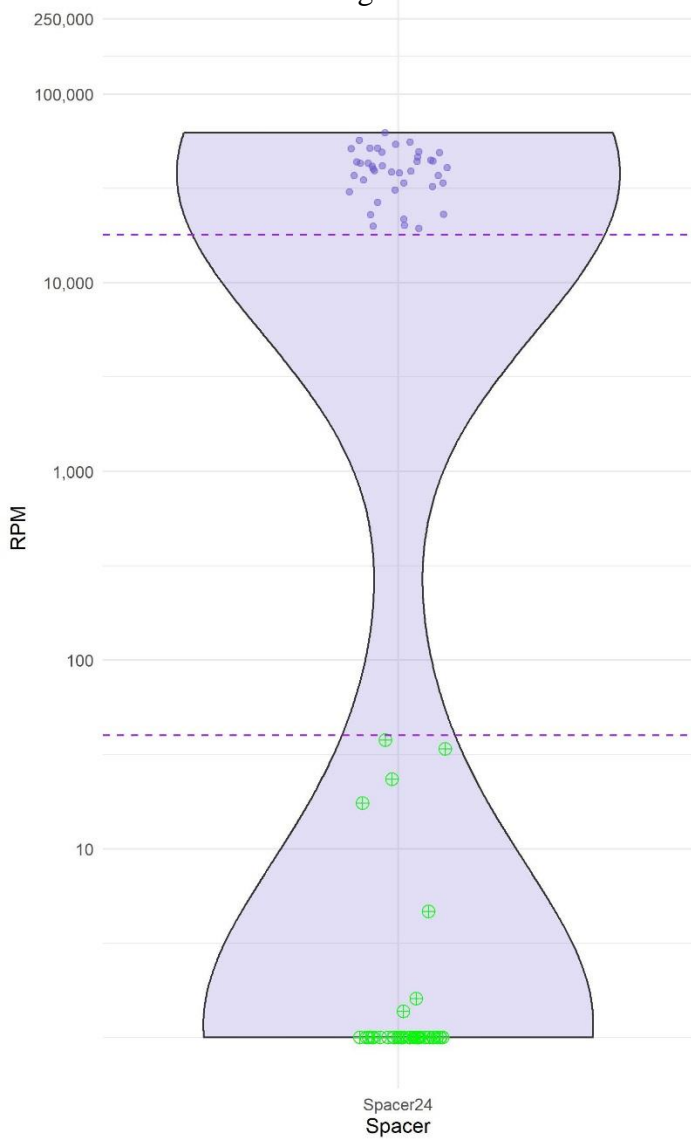

MutScan Spacer24

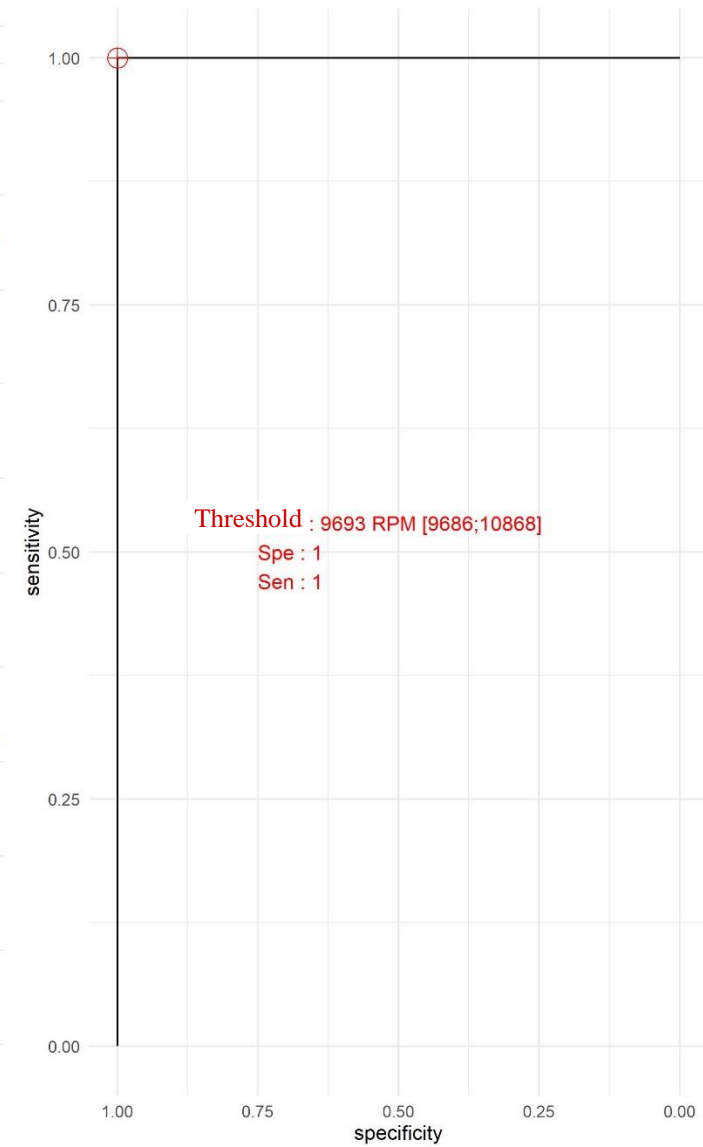

Threshold : [40;18000]

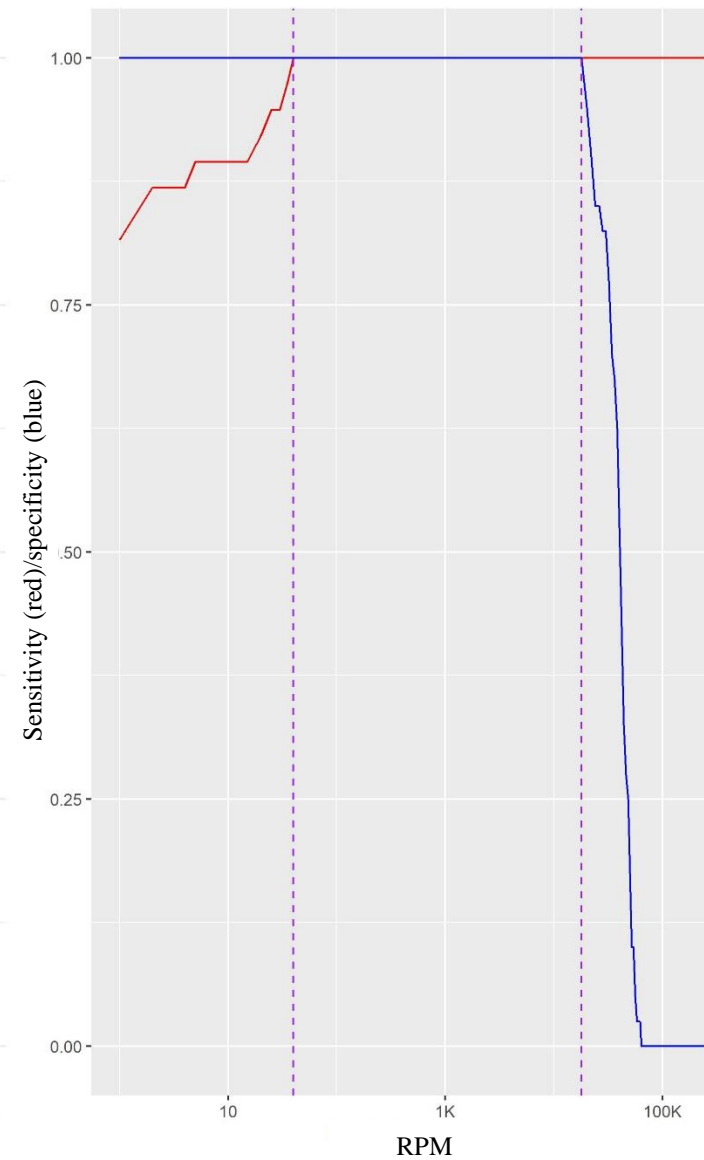

Figure S25

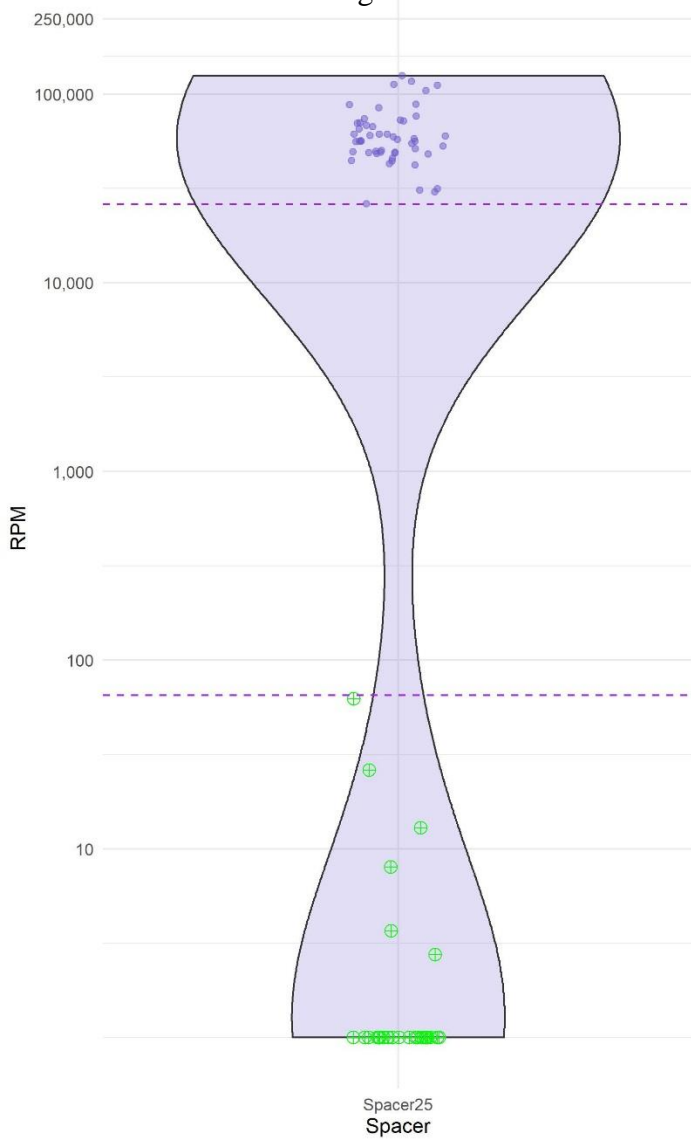

MutScan Spacer25

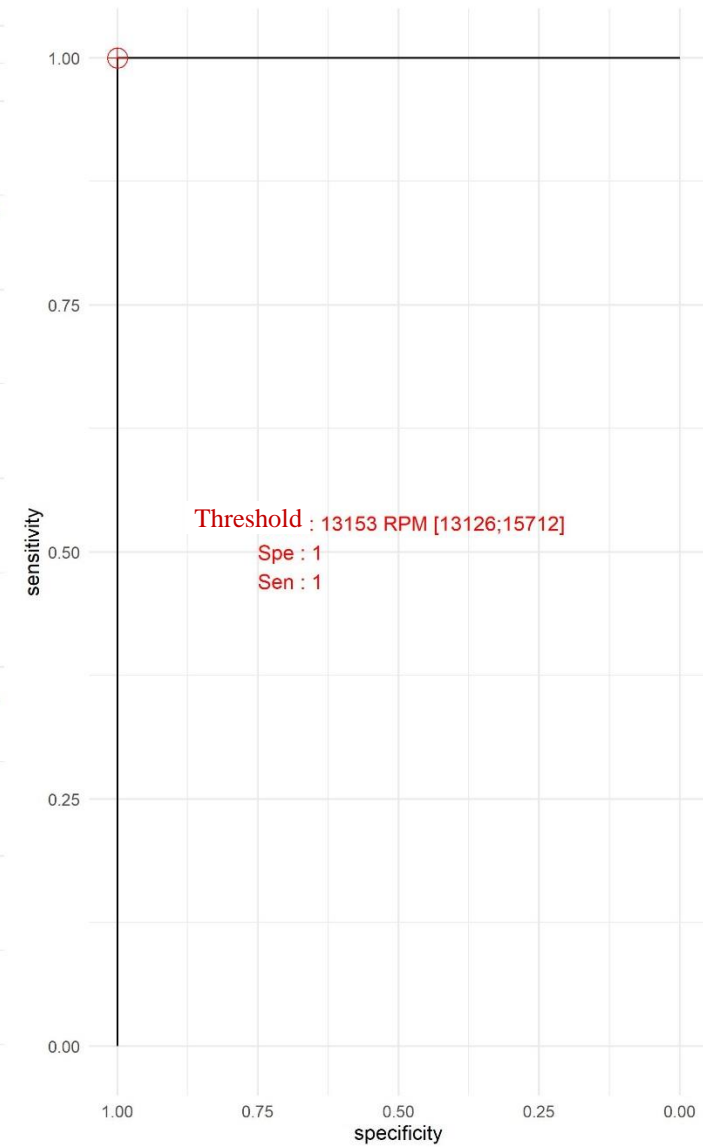

Threshold : [65;26000]

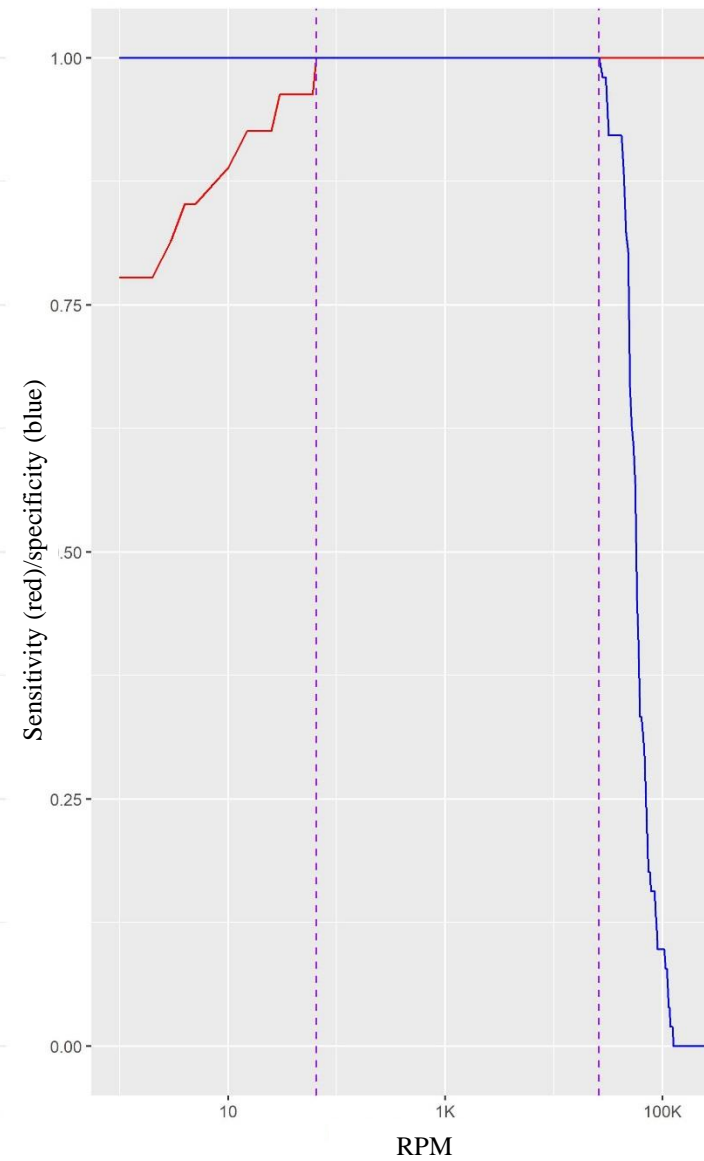

Figure S26

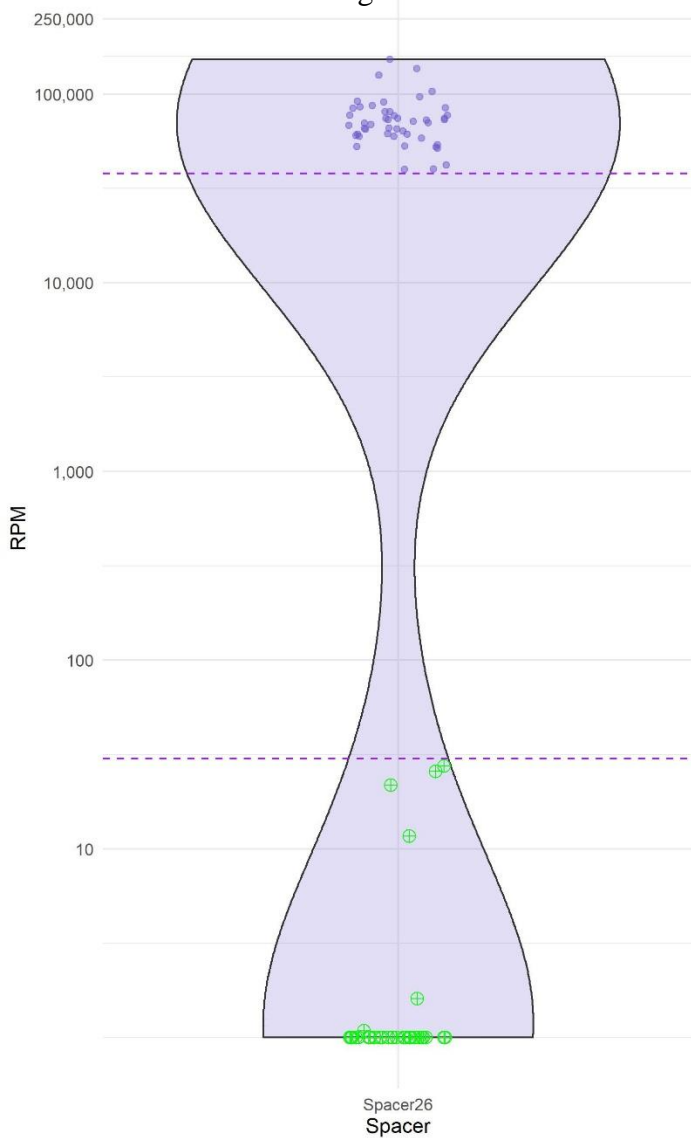

MutScan Spacer26

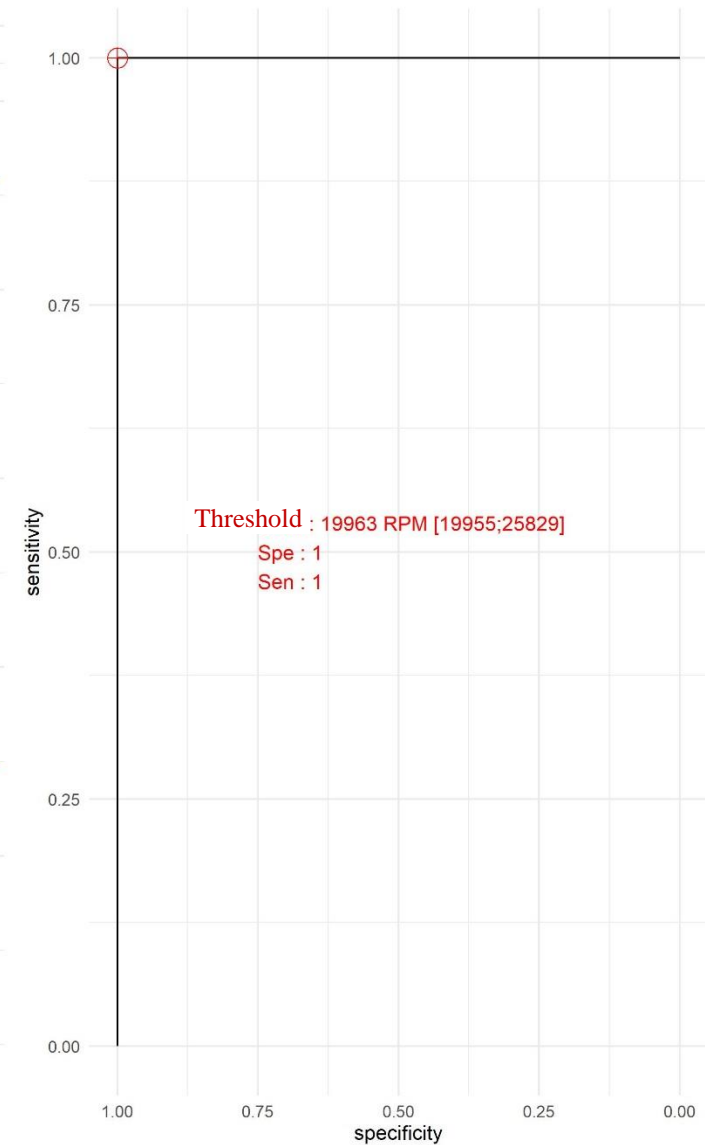

Threshold : [30;38000]

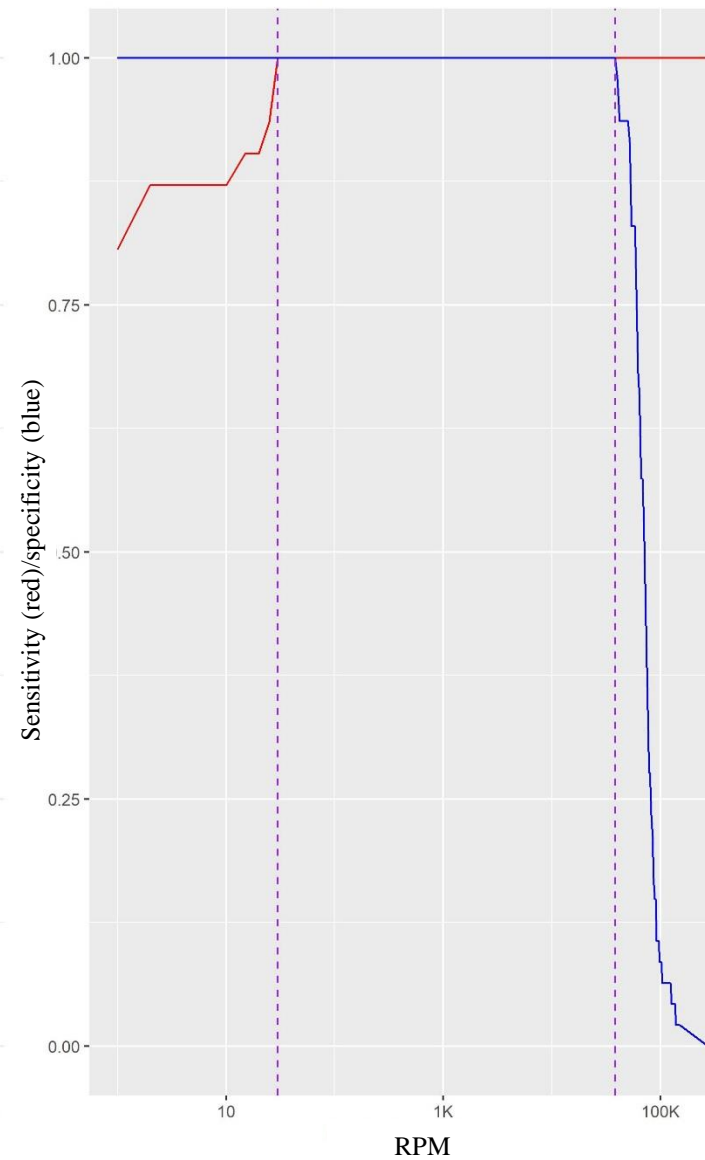

Figure S27

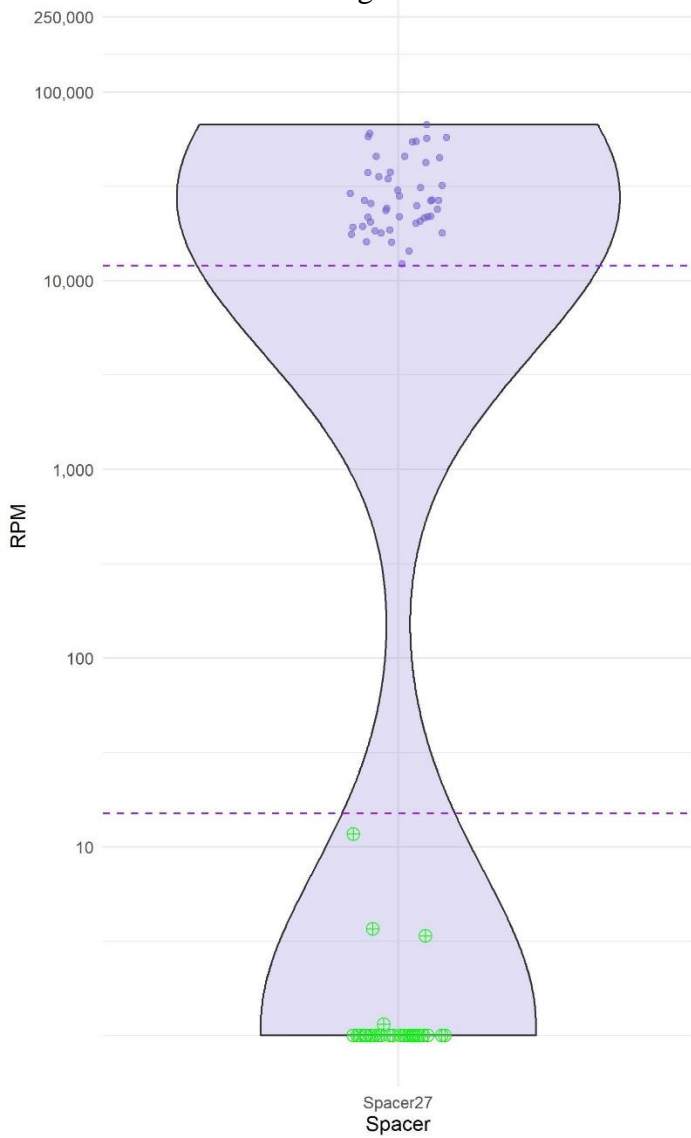

MutScan Spacer27

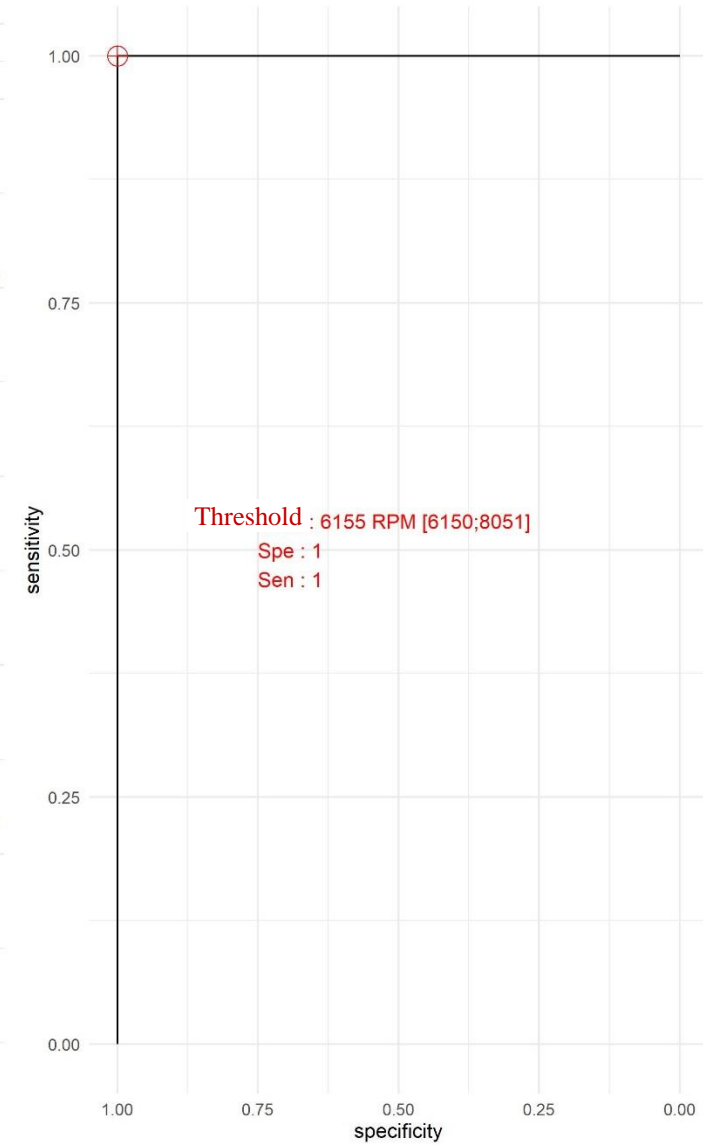

Threshold : [15;12000]

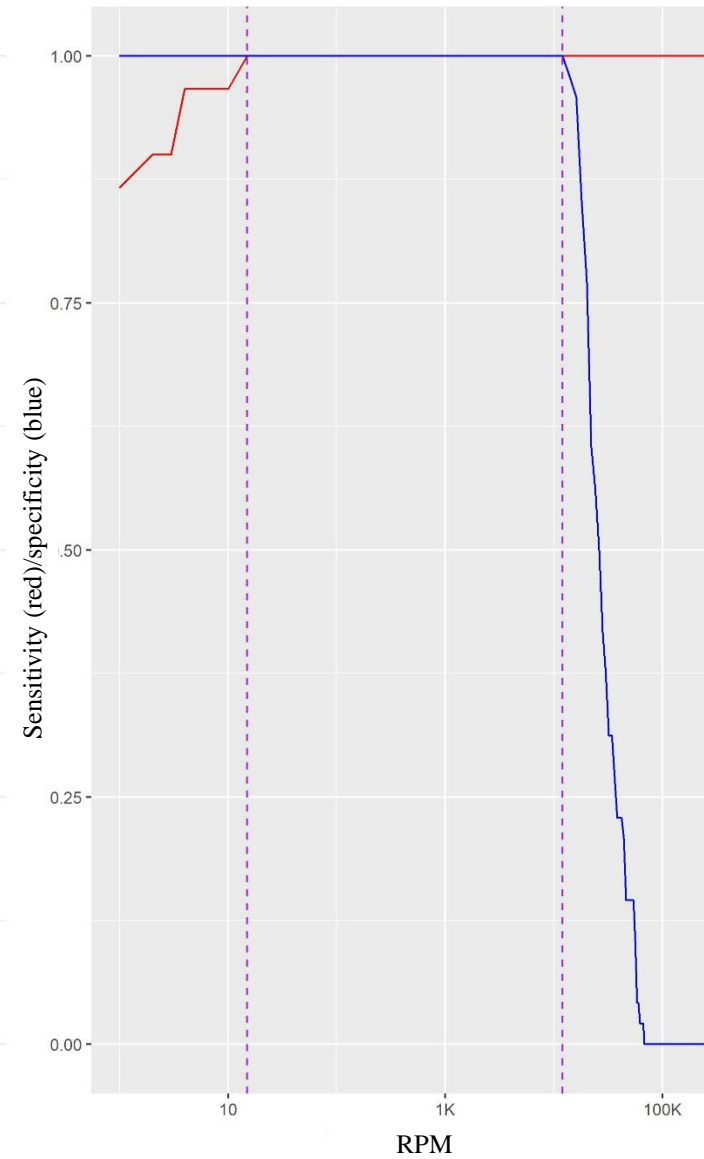

Figure S28

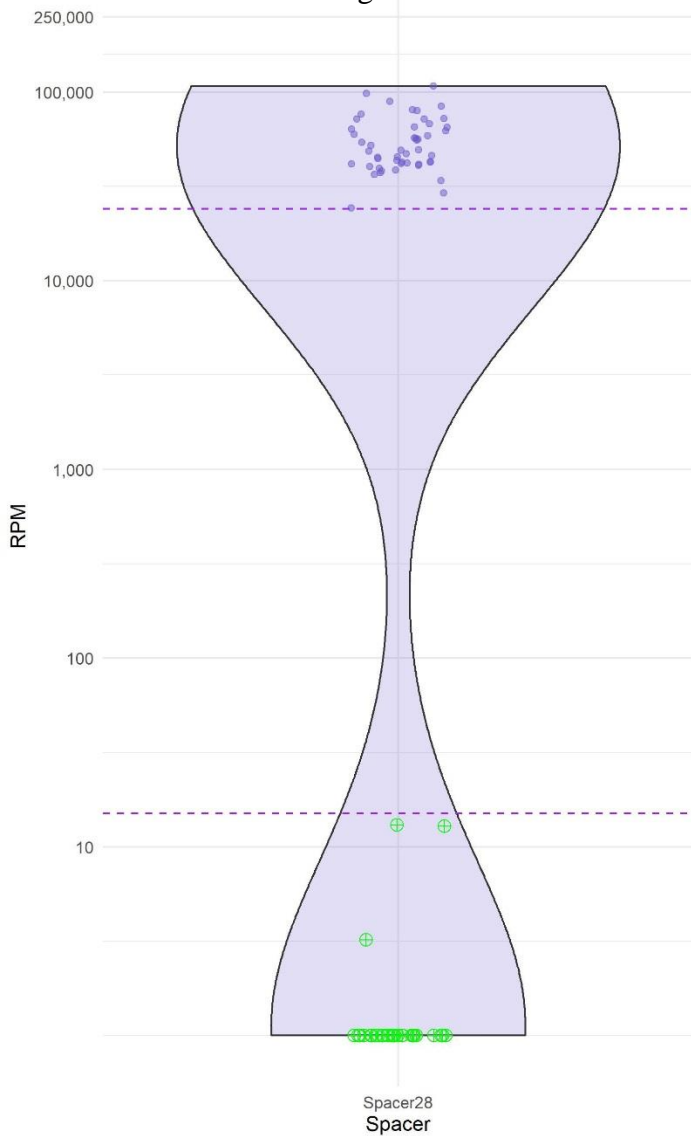

MutScan Spacer28

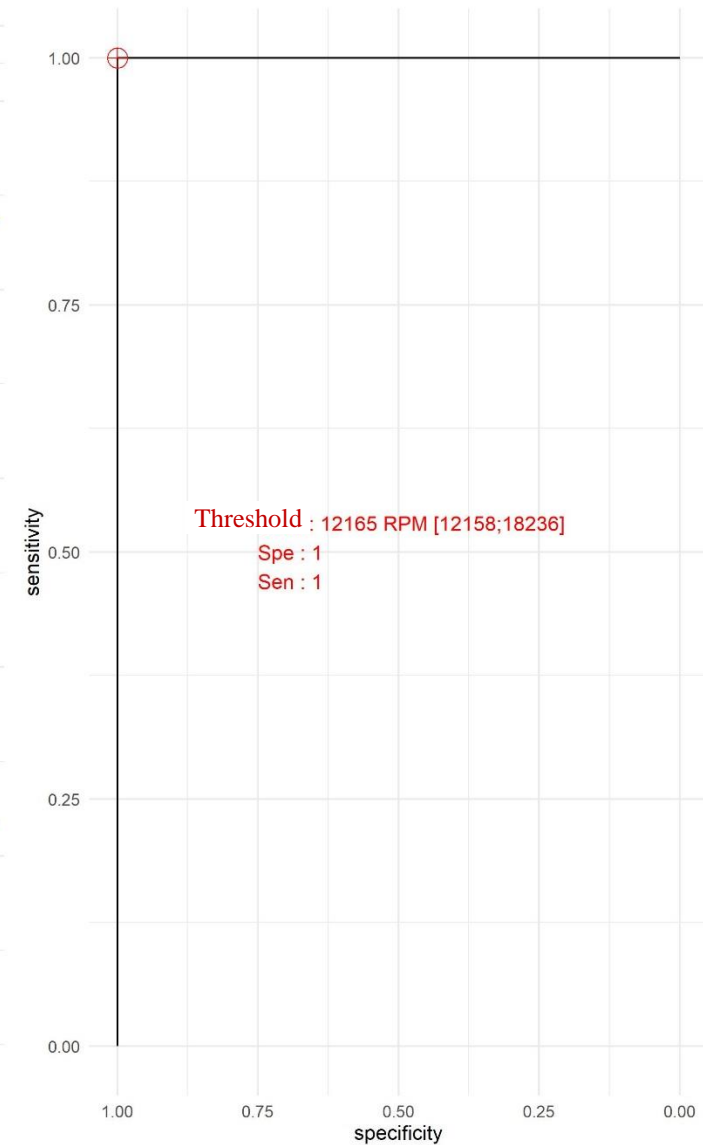

Threshold : [15;24000]

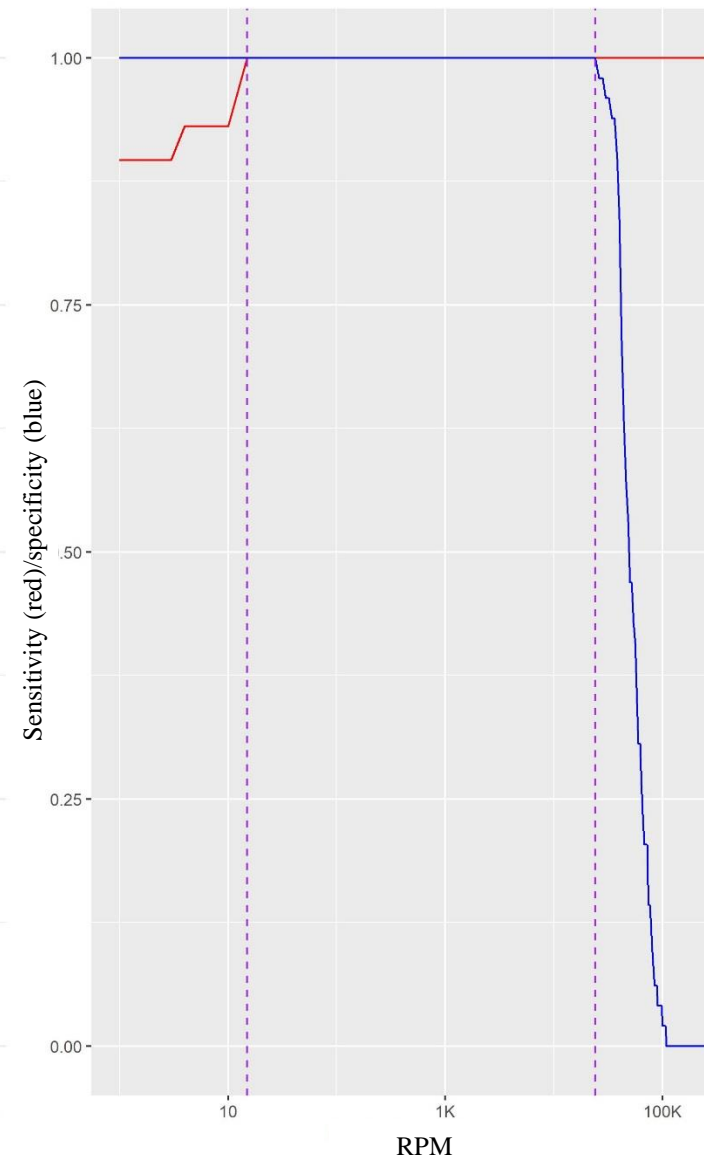

Figure S29

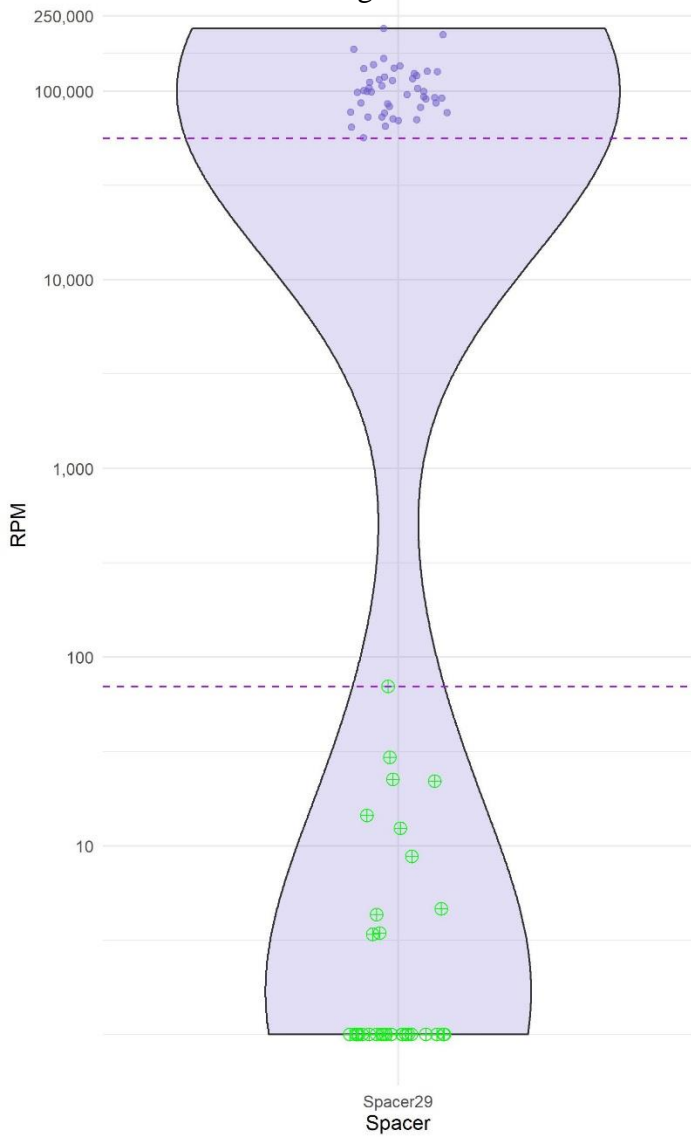

MutScan Spacer29

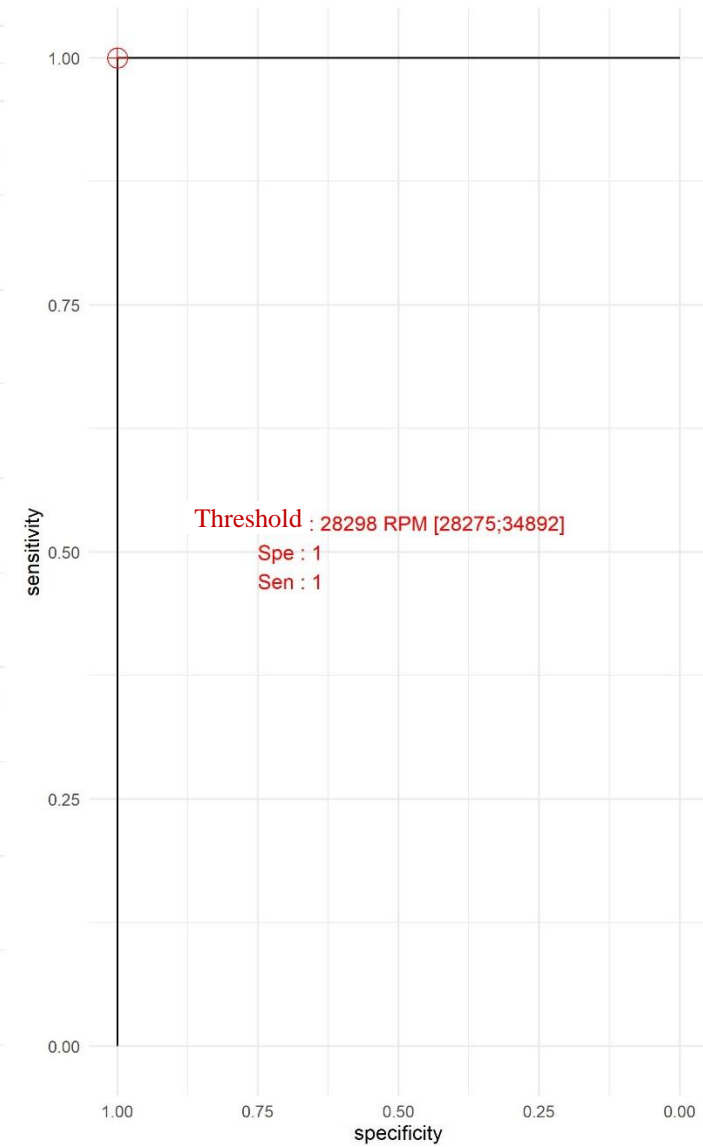

Threshold : [70;56000]

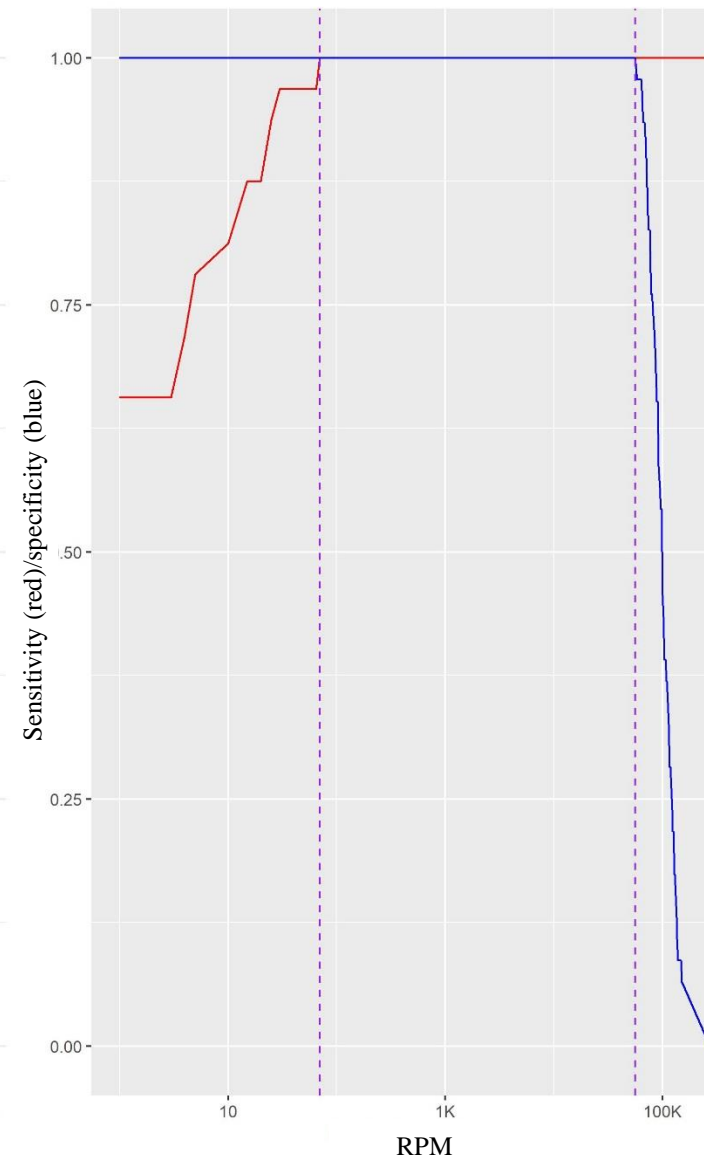

Figure S30

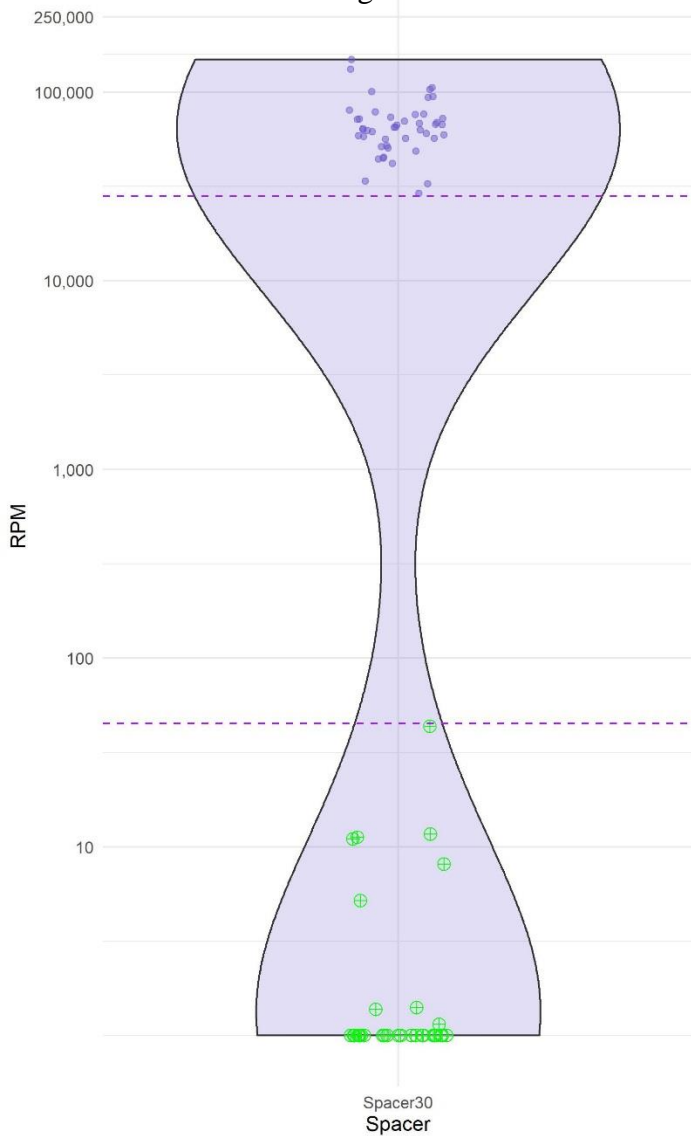

MutScan Spacer30

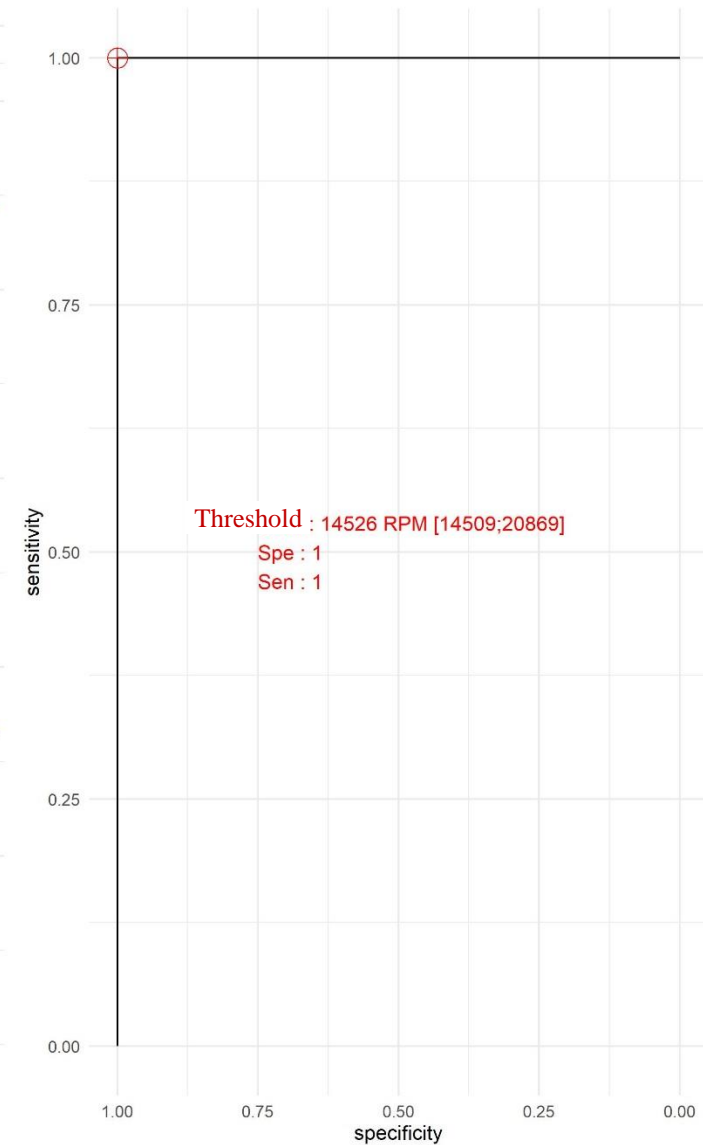

Threshold : [45;28000]

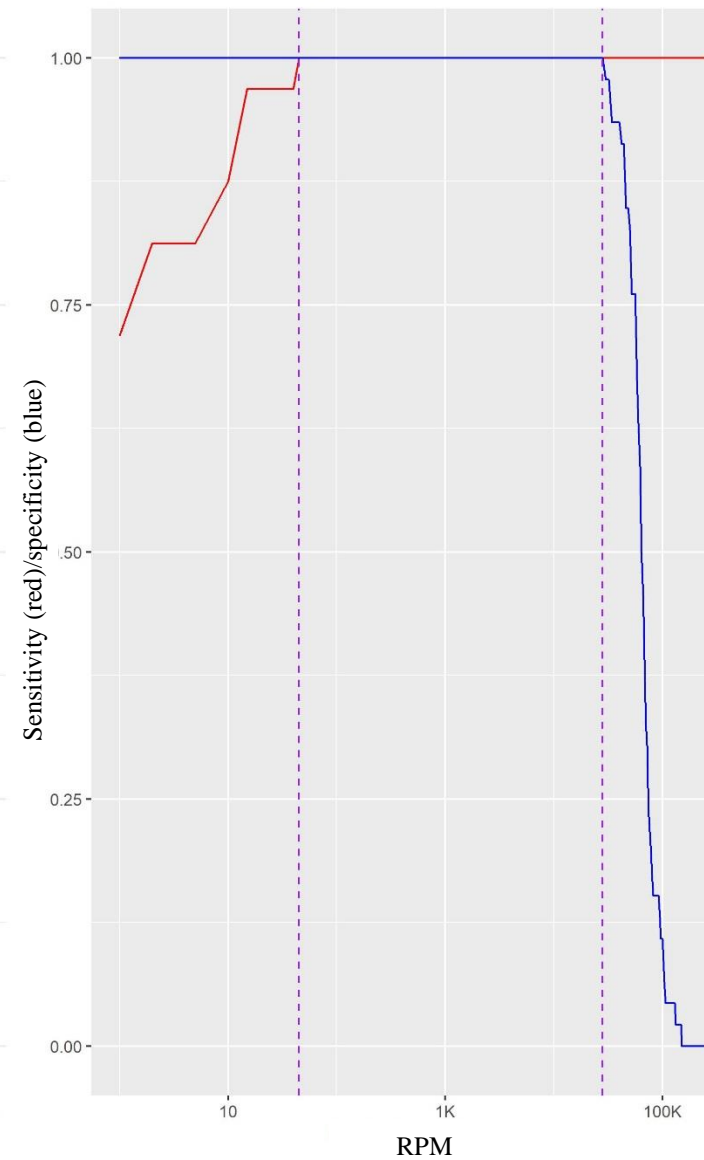

Figure S31

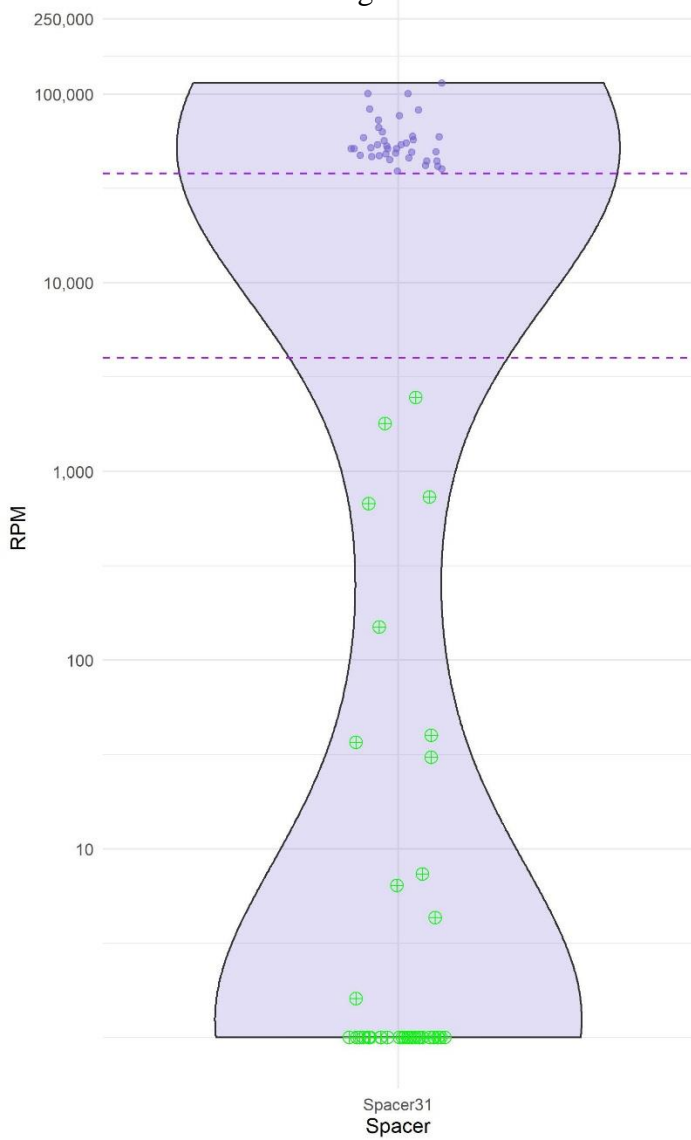

MutScan Spacer31

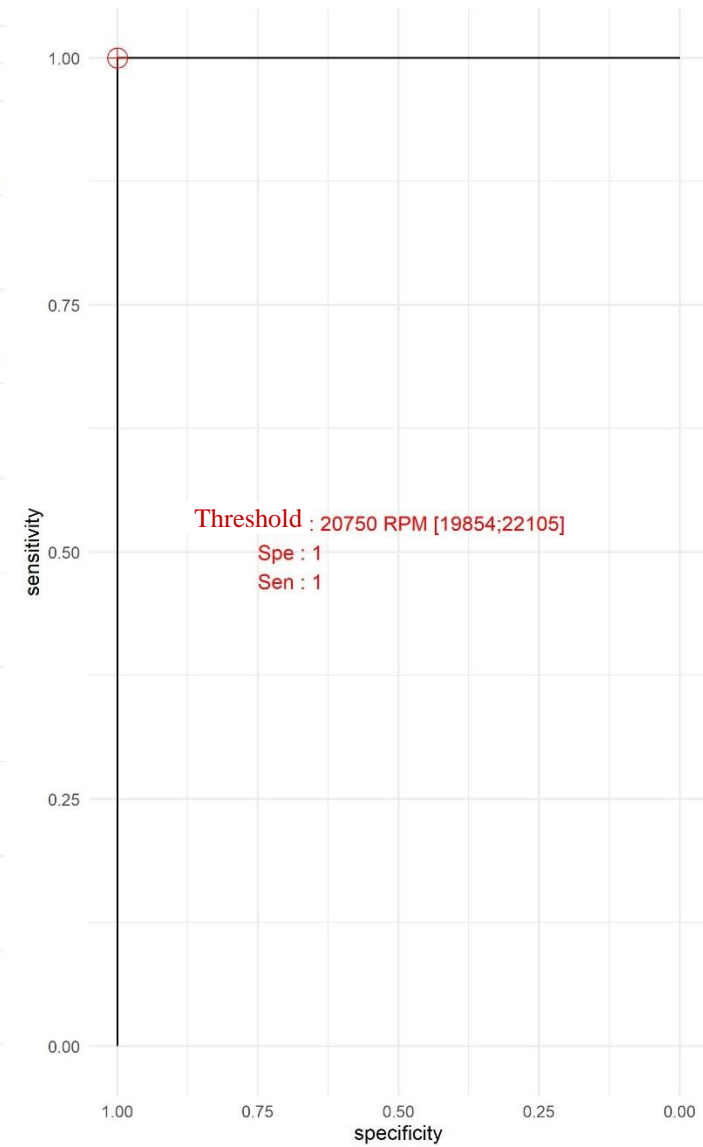

Threshold : [4000;38000]

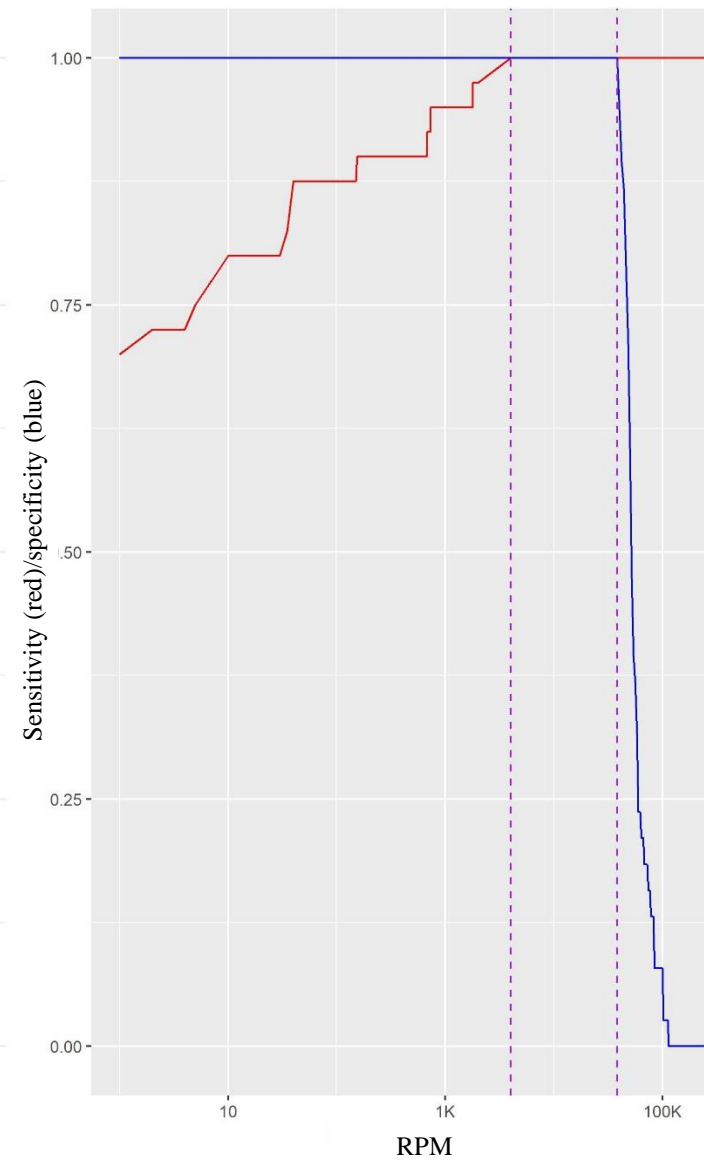



Figure S32

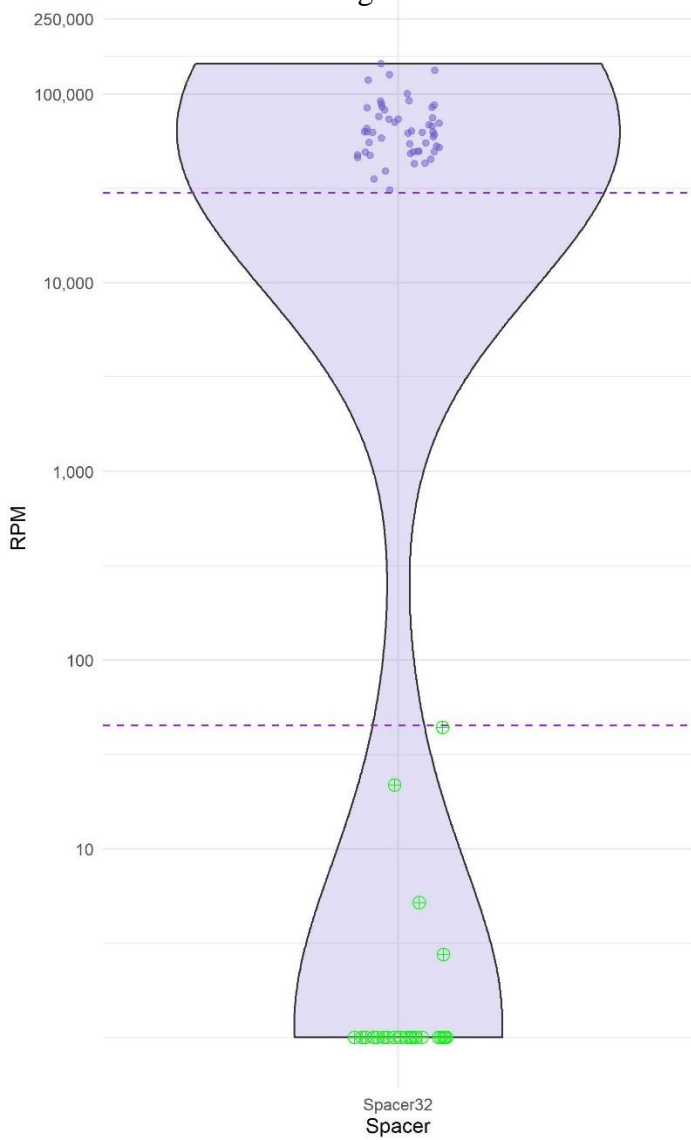

MutScan Spacer32

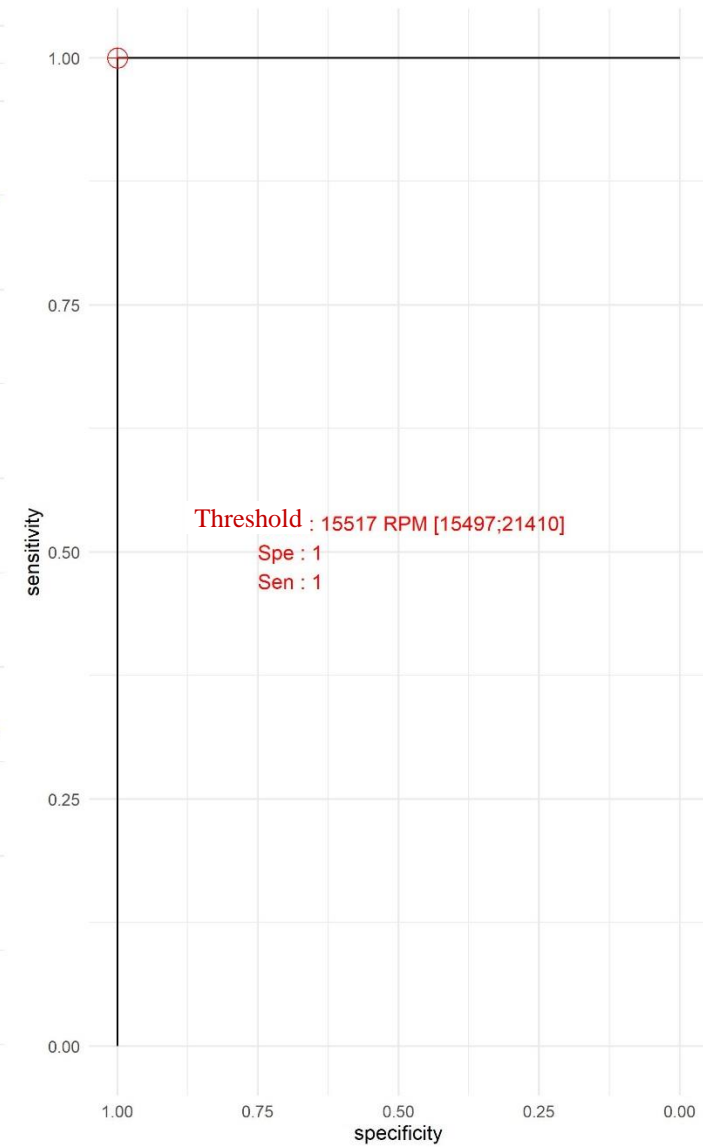

Threshold : [45;30000]

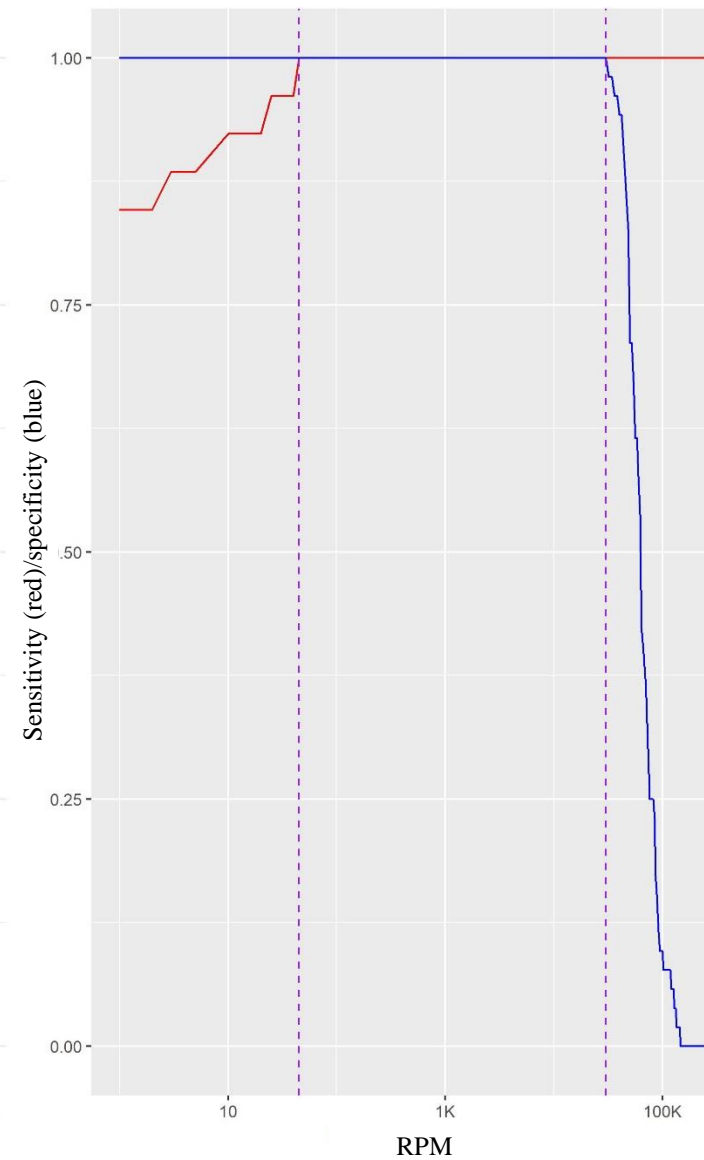

Figure S33

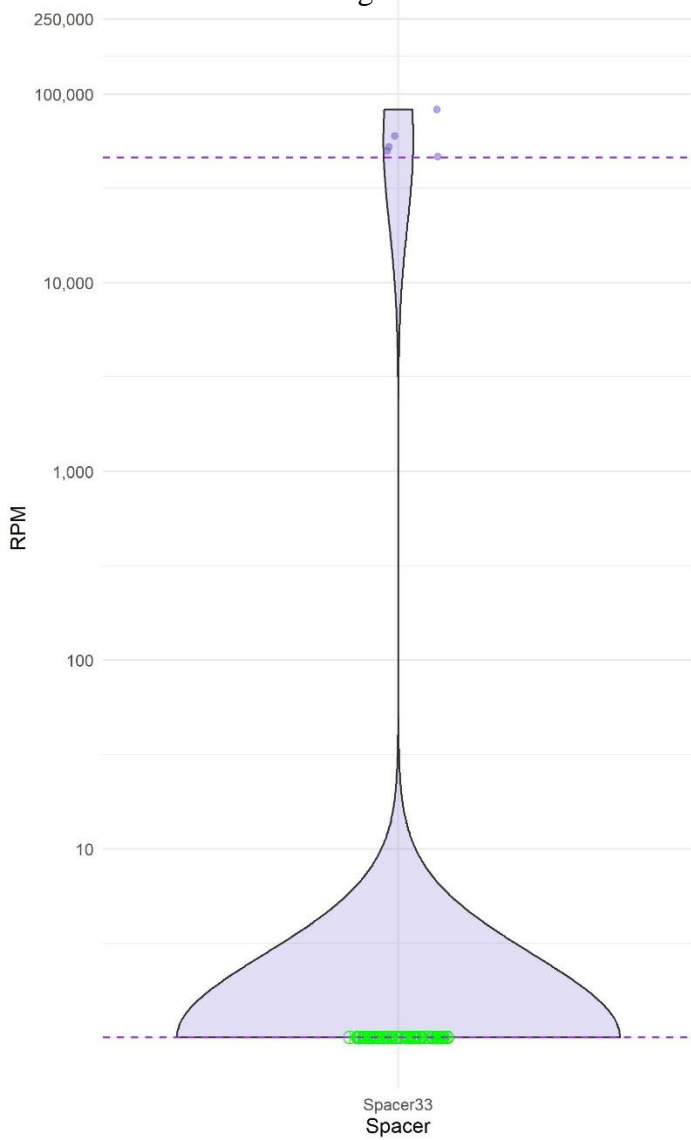

MutScan Spacer33

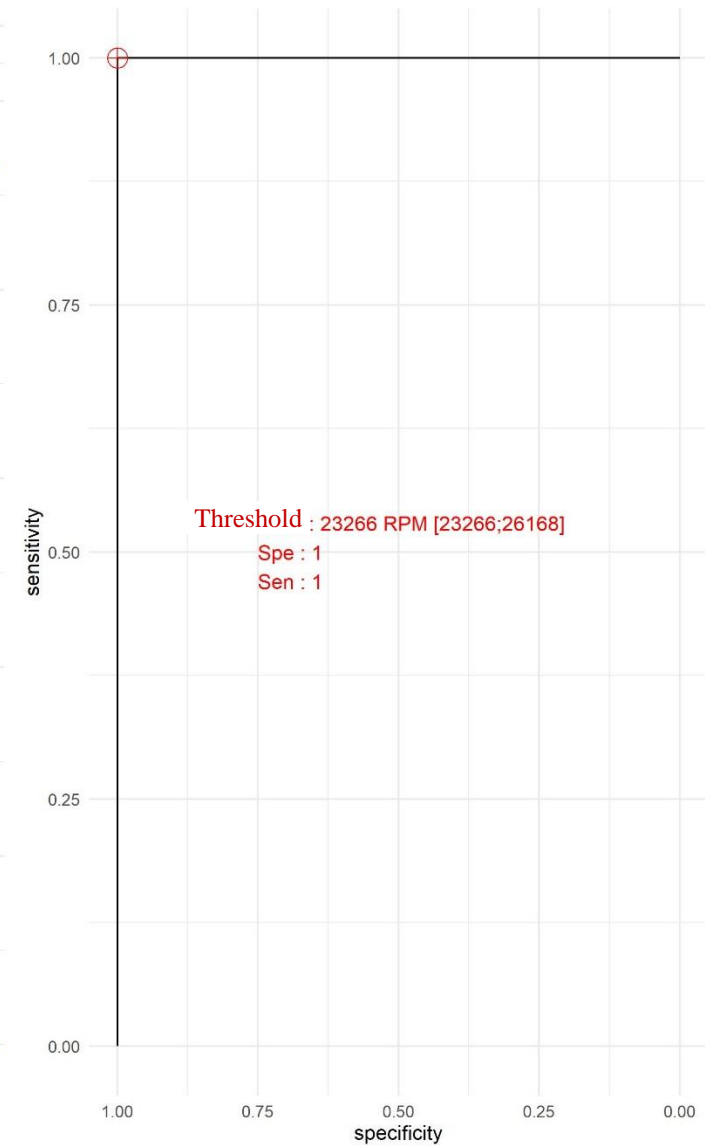

Threshold : [1;46000]

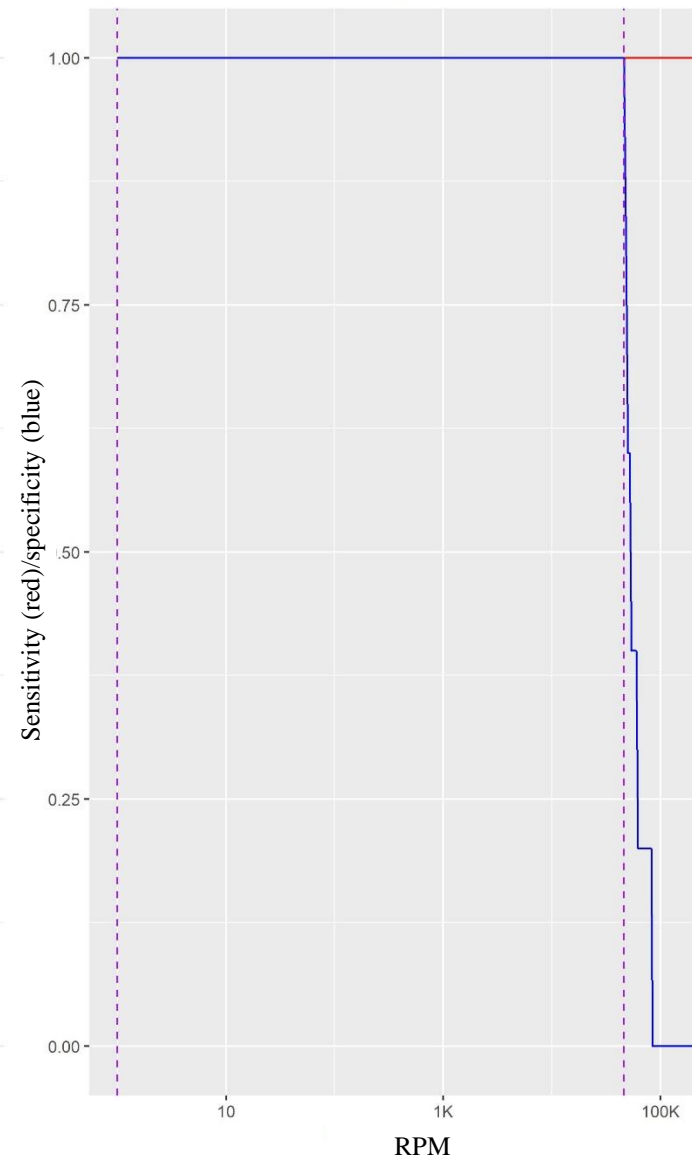

Figure S34

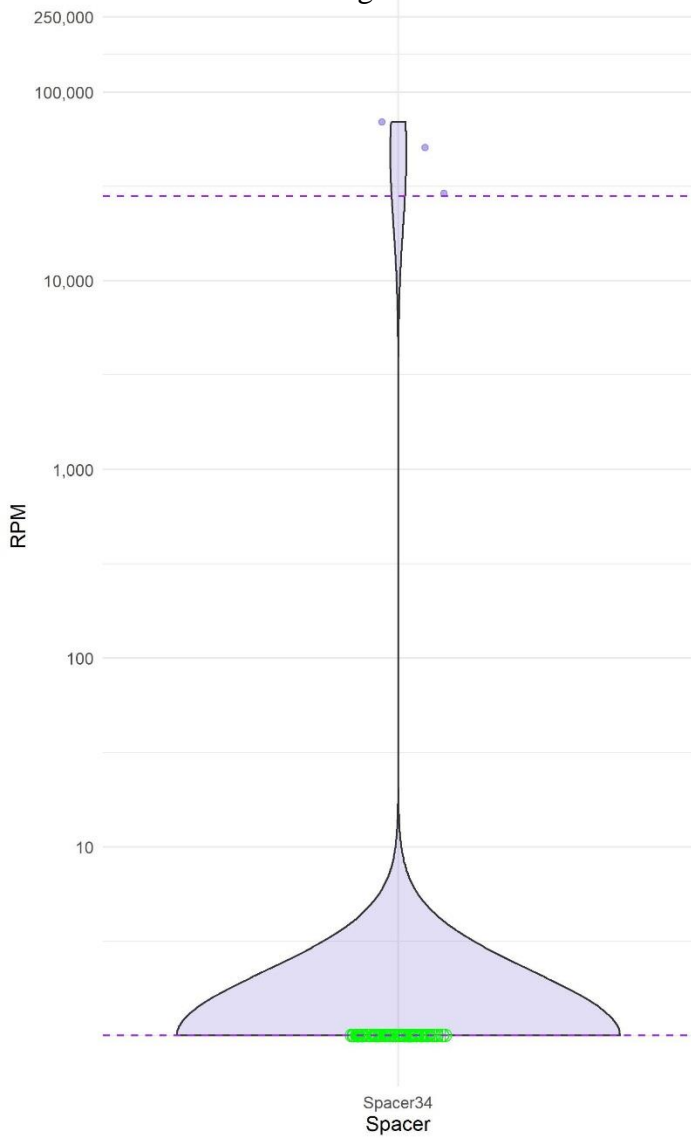

MutScan Spacer34

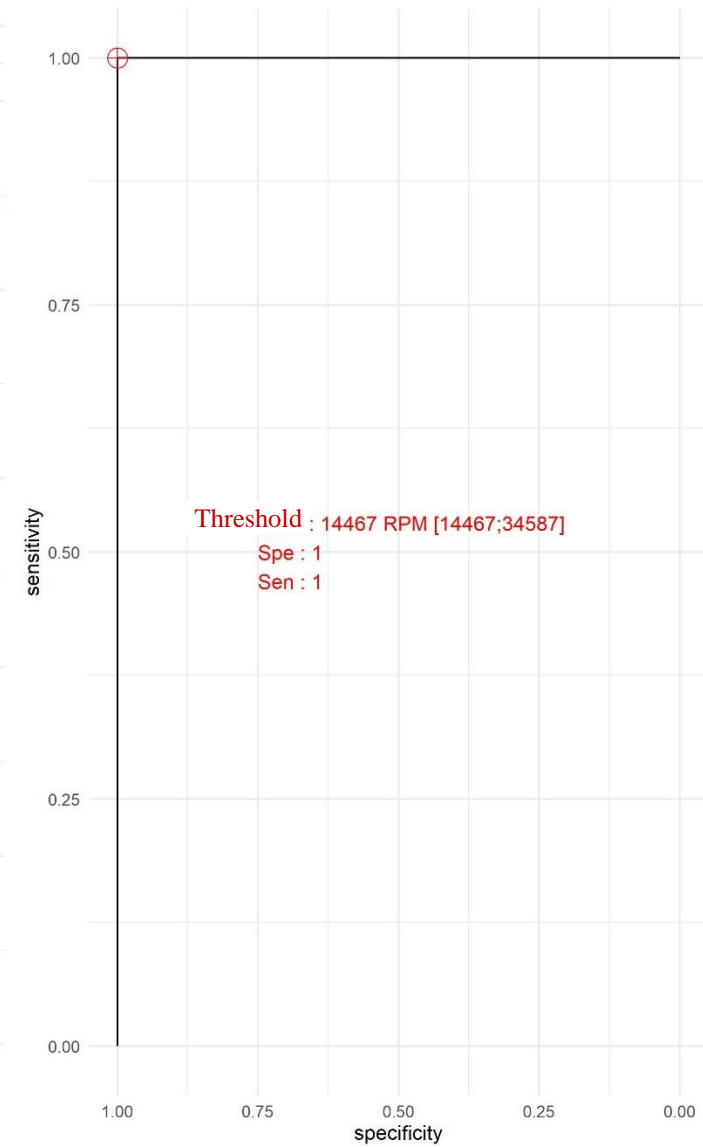

Threshold : [1;28000]

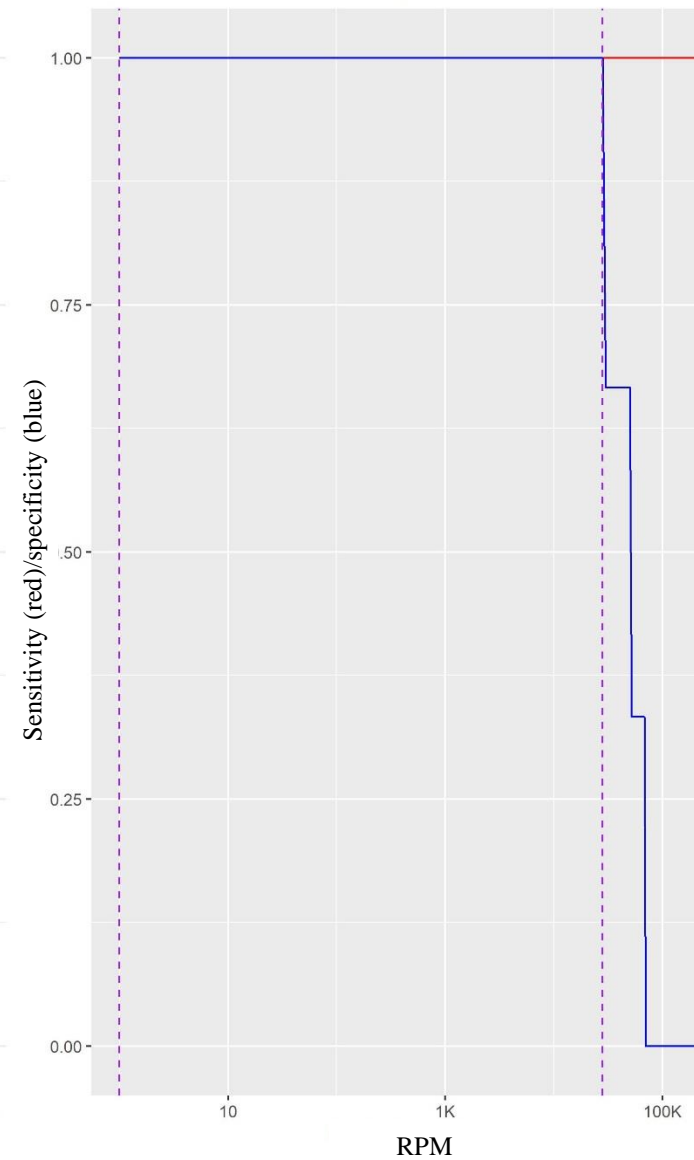

Figure S35

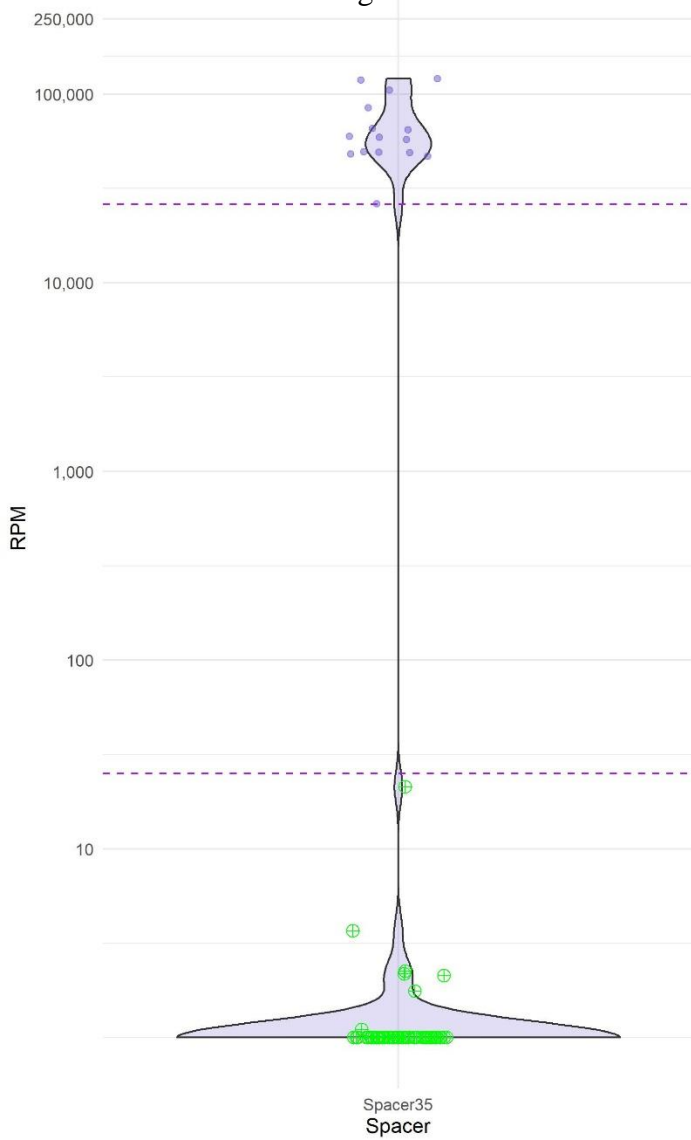

MutScan Spacer35

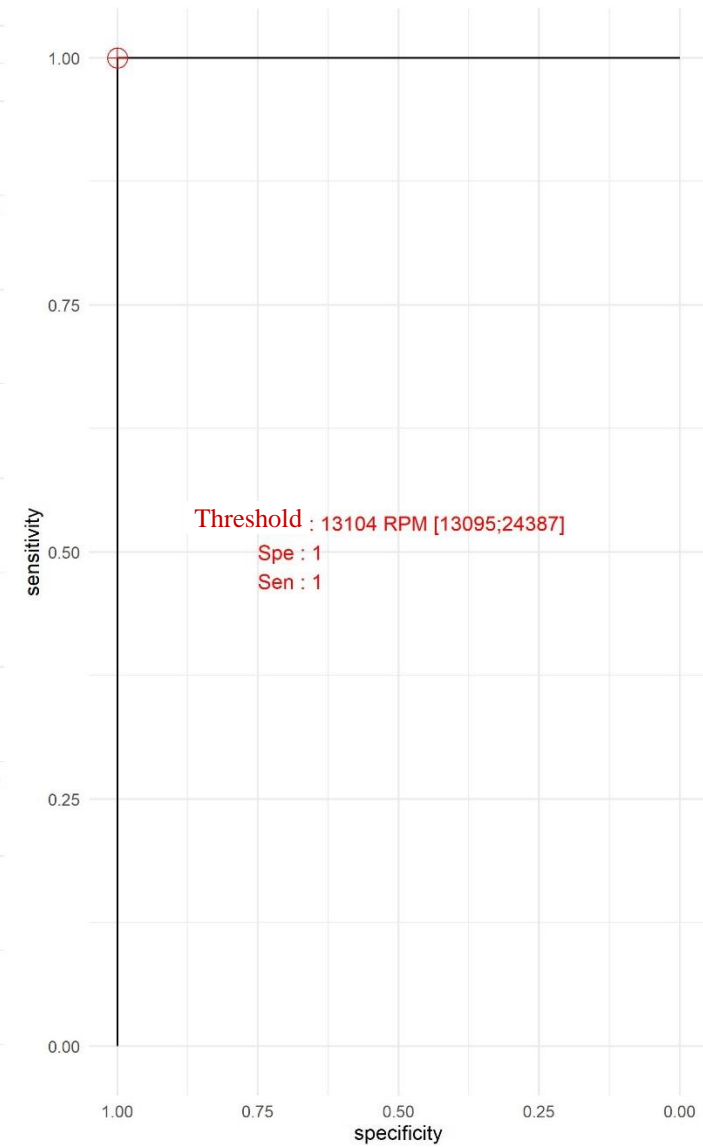

Threshold : [25;26000]

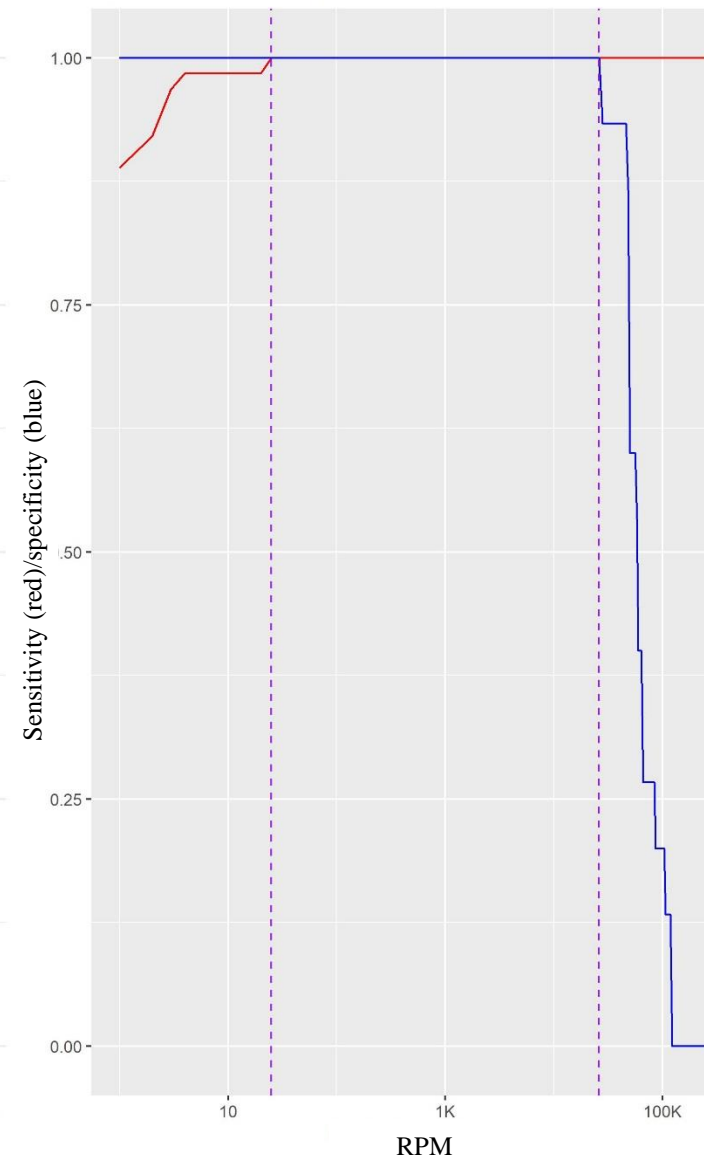

Figure S36

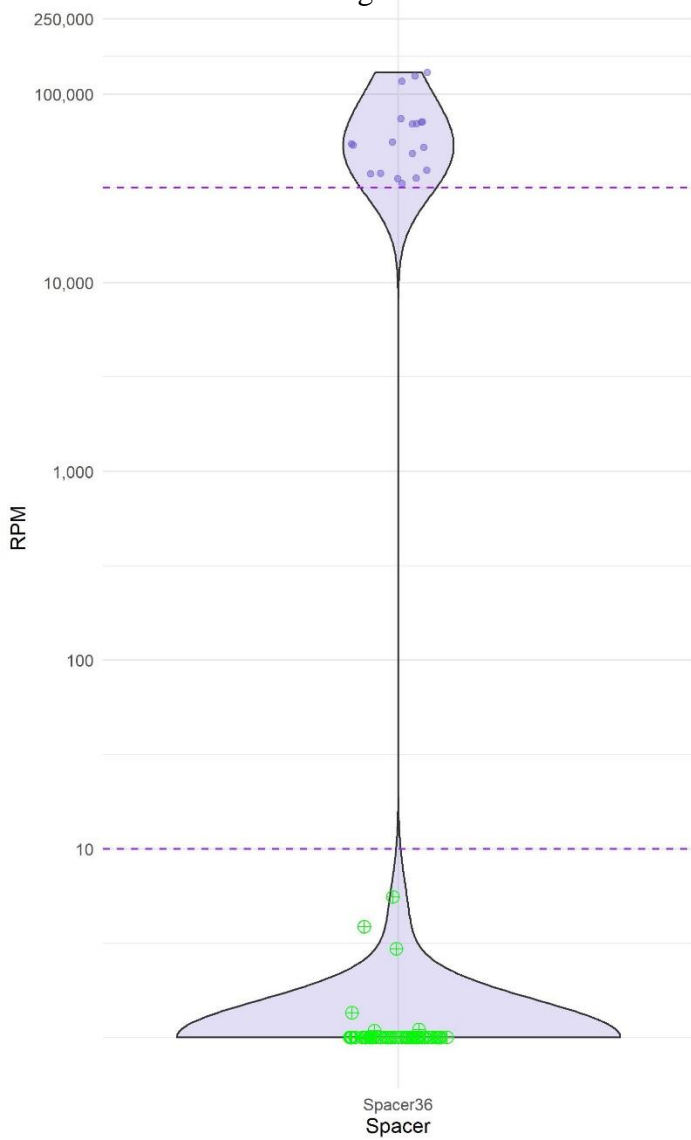

MutScan Spacer36

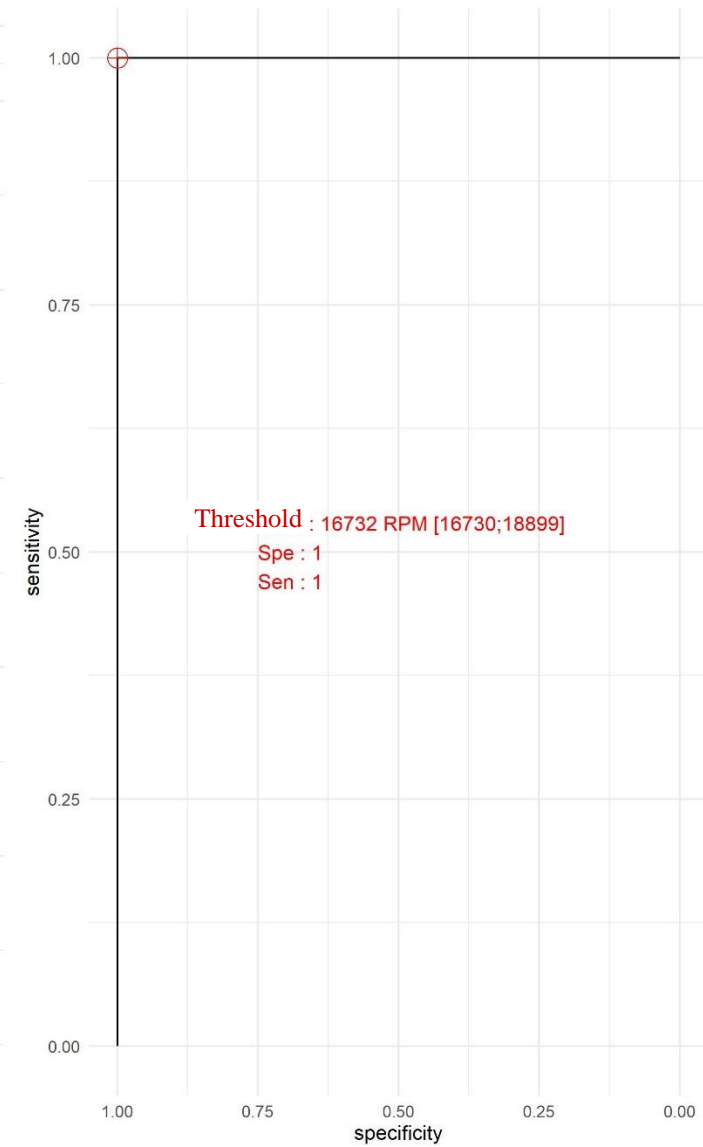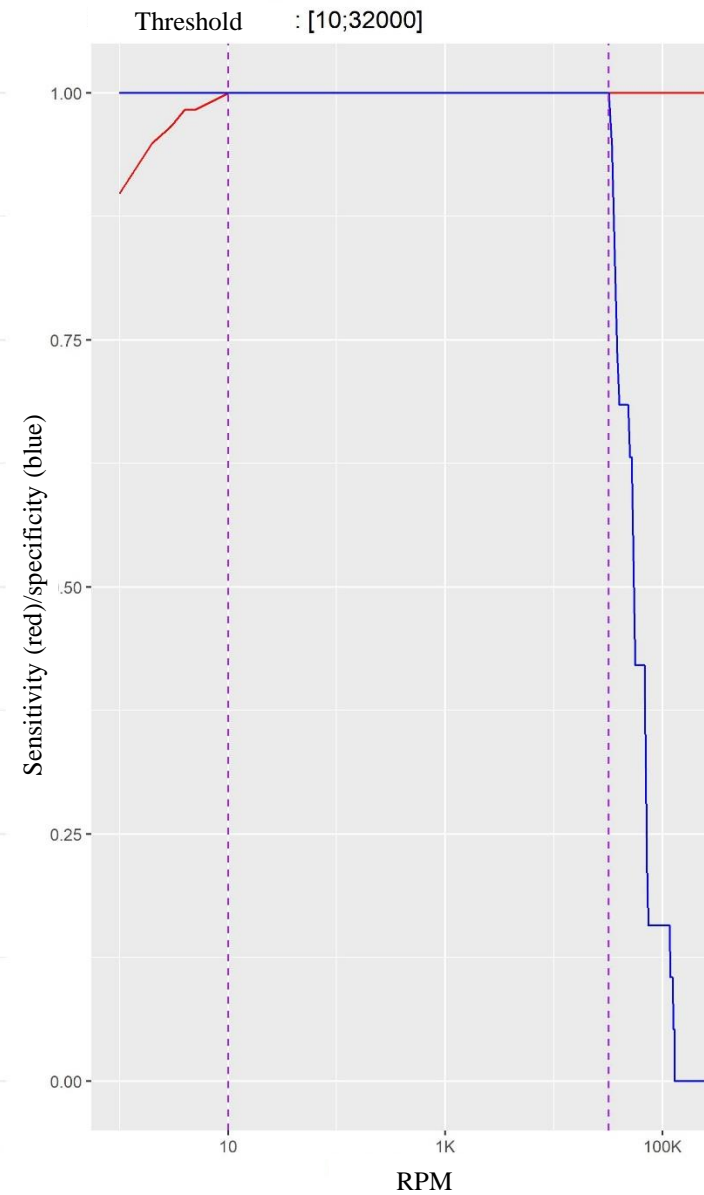

Figure S37

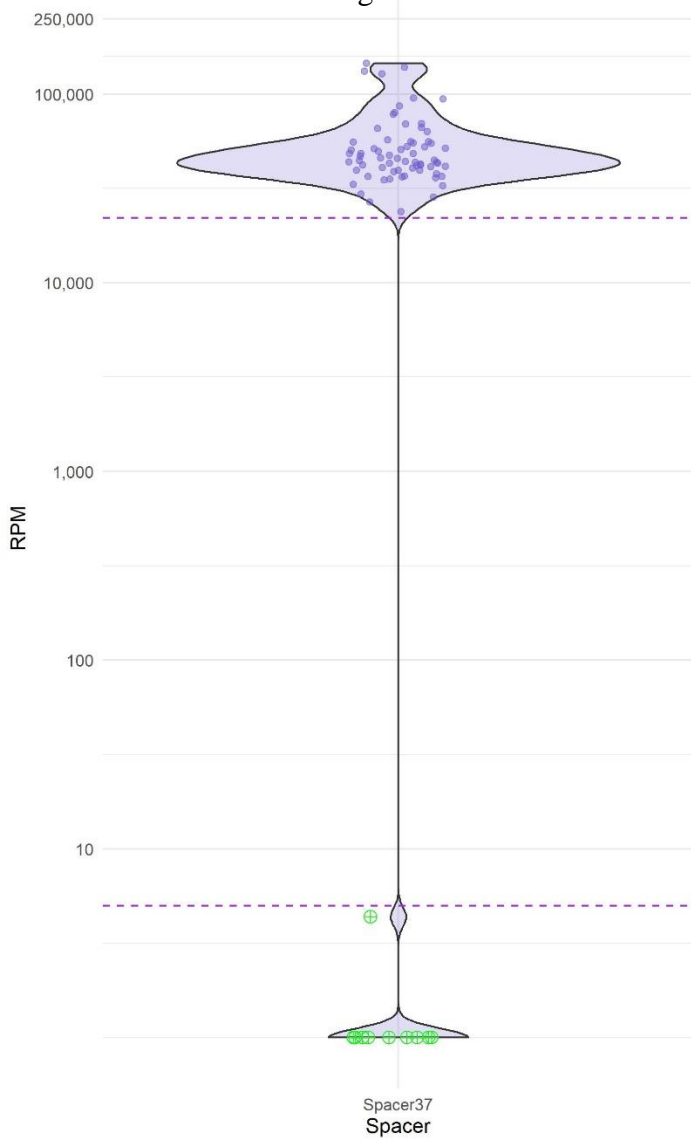

MutScan Spacer37

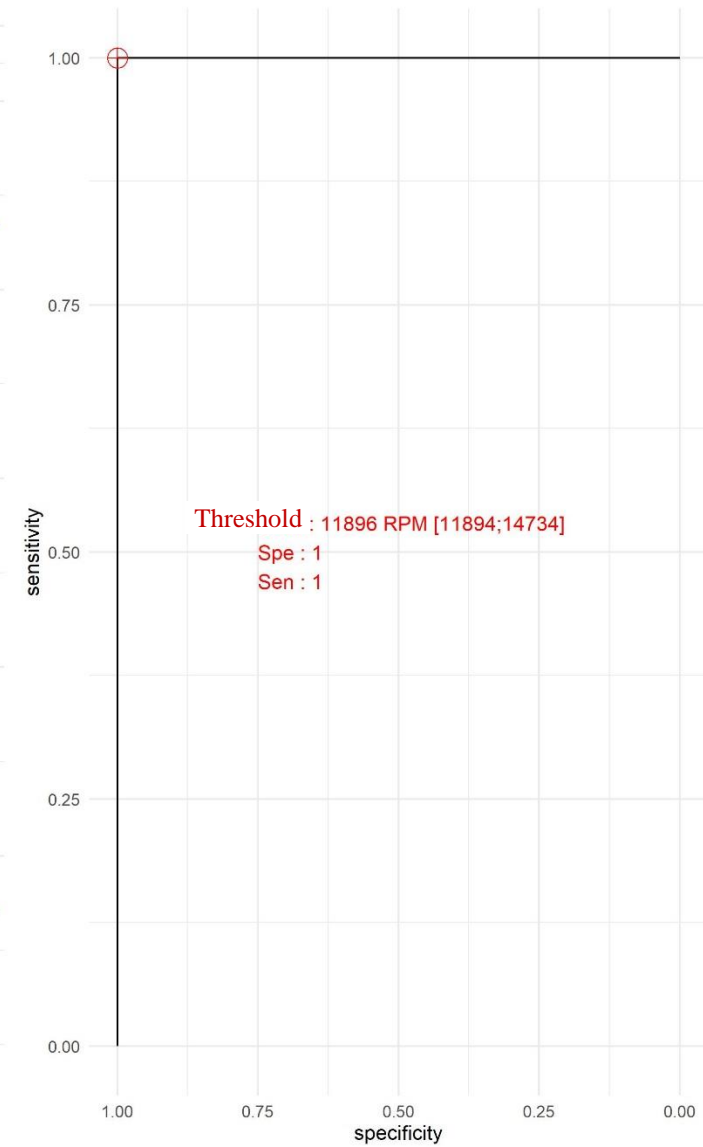

Threshold : [5;22000]

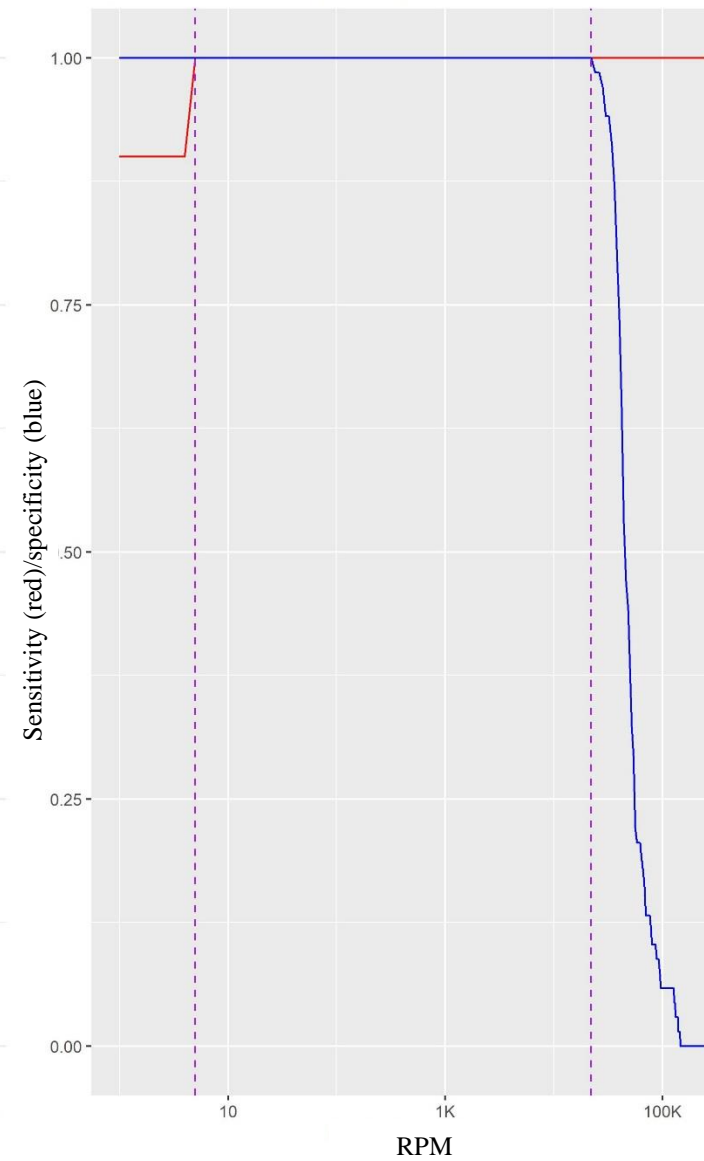

Figure S38

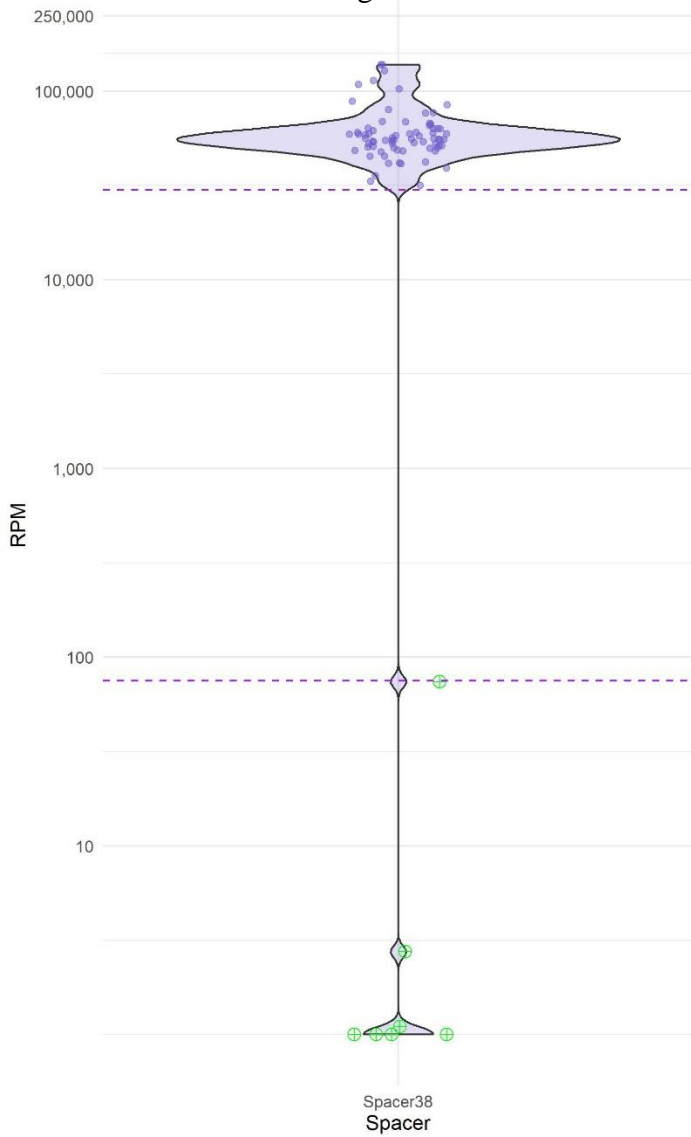

MutScan Spacer38

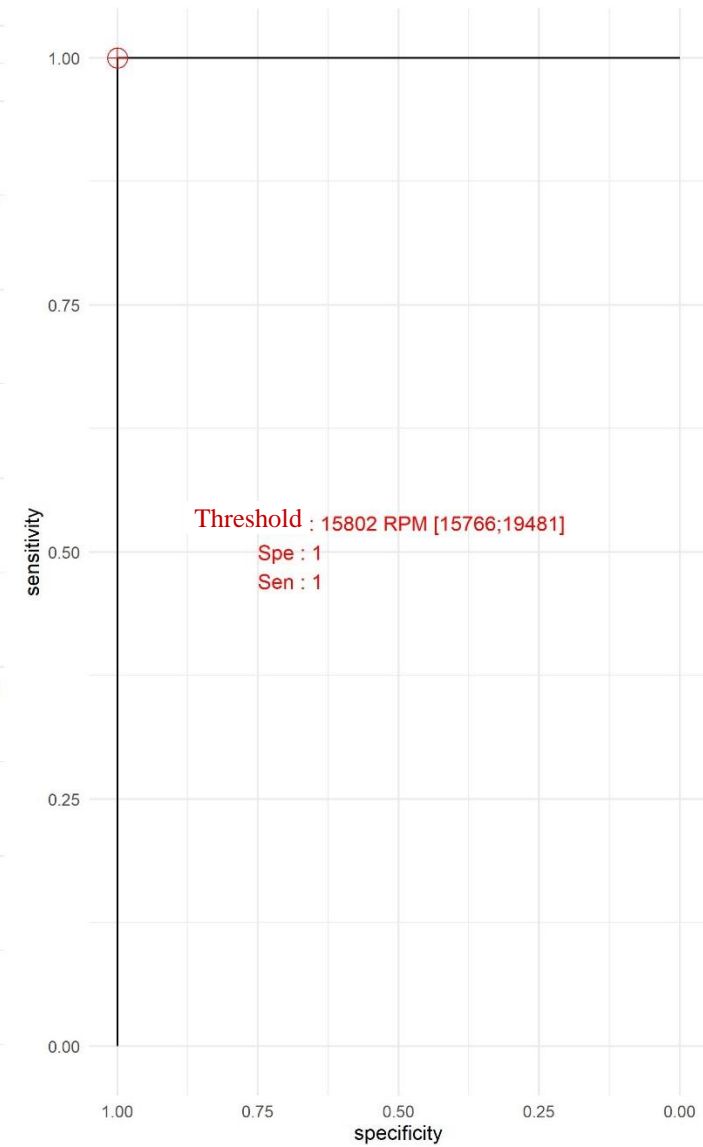

Threshold : [75;30000]

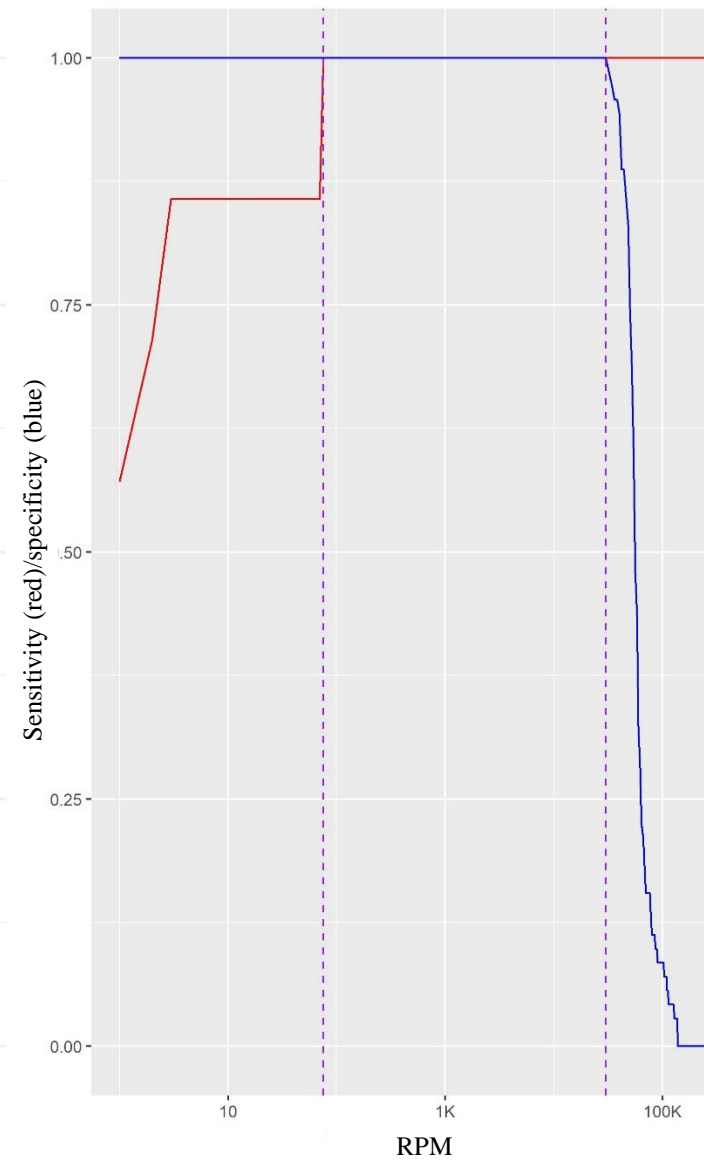

Figure S39

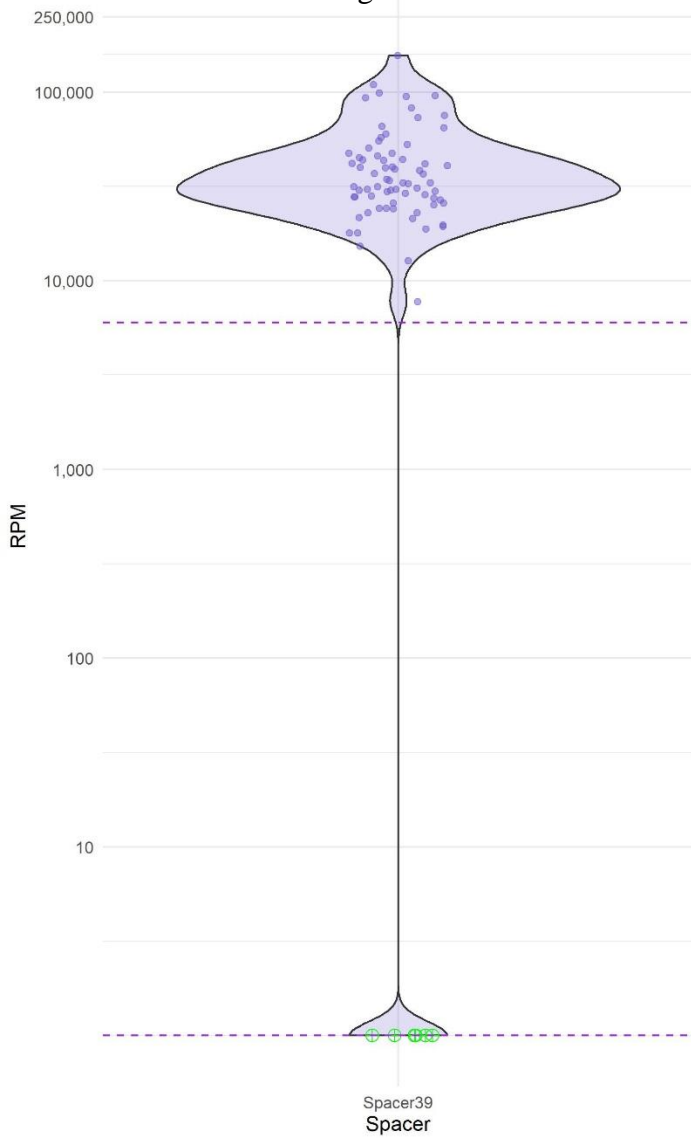

MutScan Spacer39

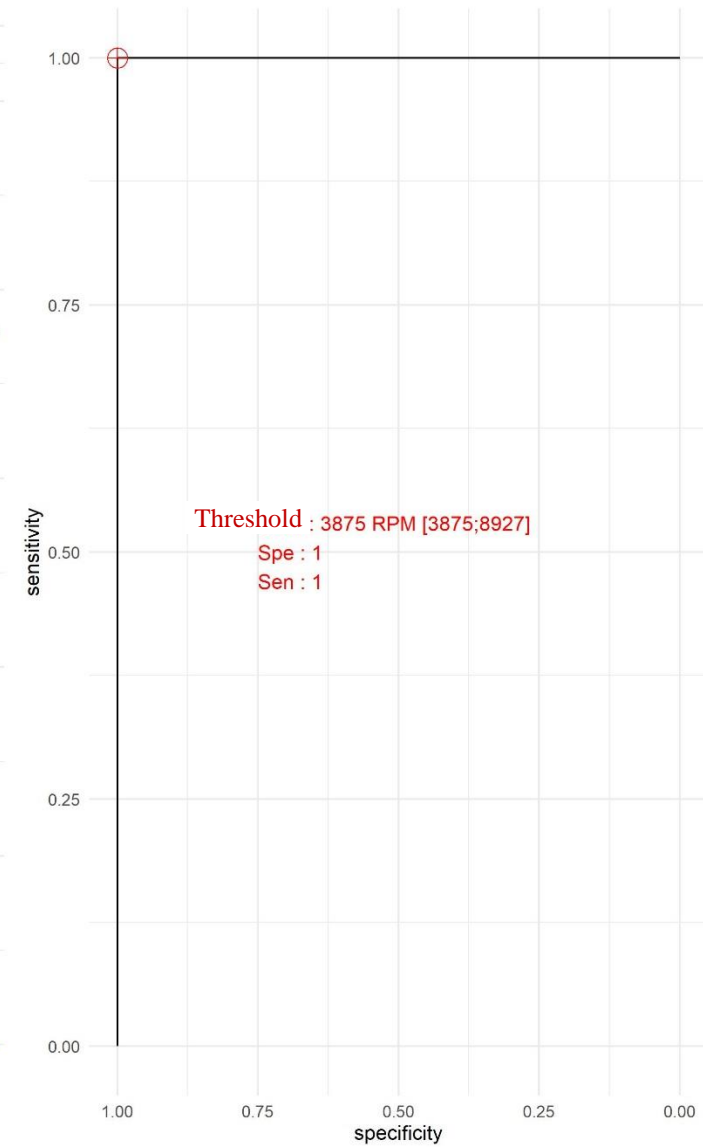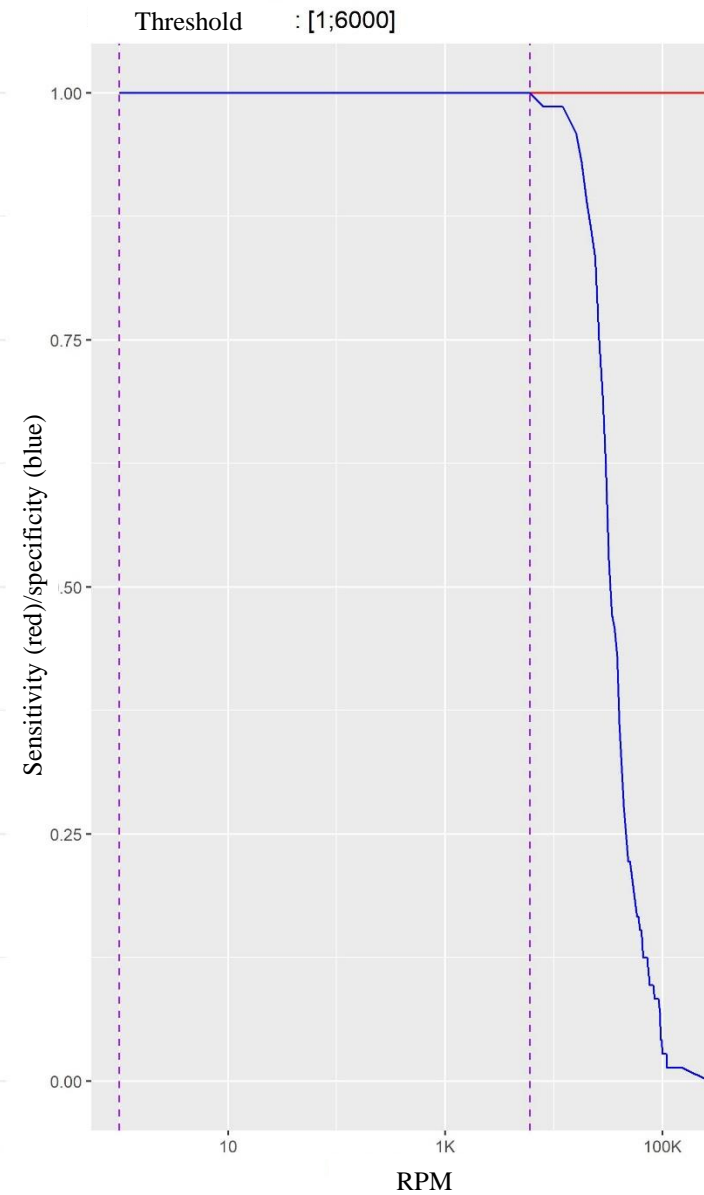



Figure S40

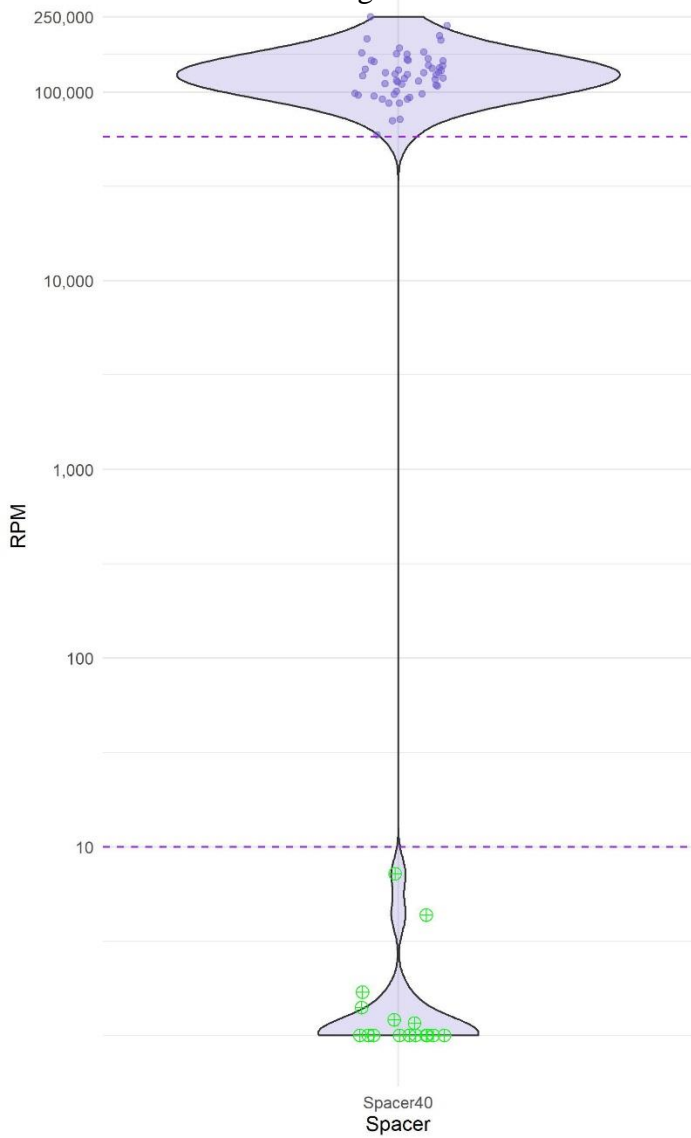

MutScan Spacer40

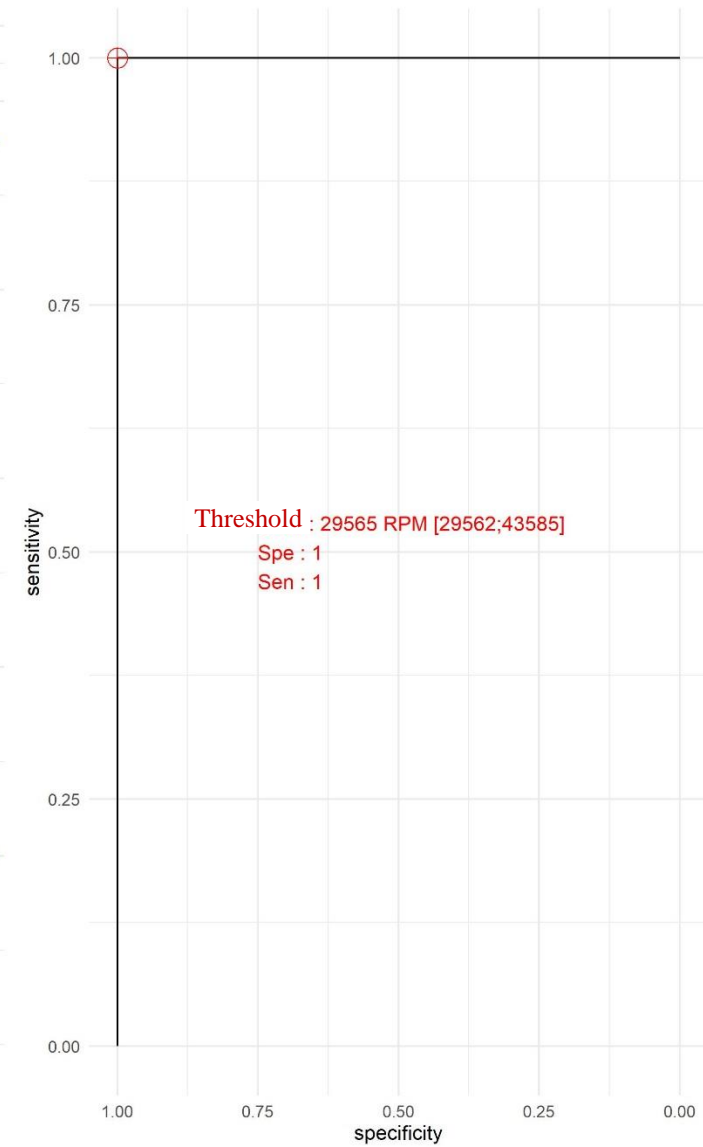

Threshold : [10;58000]

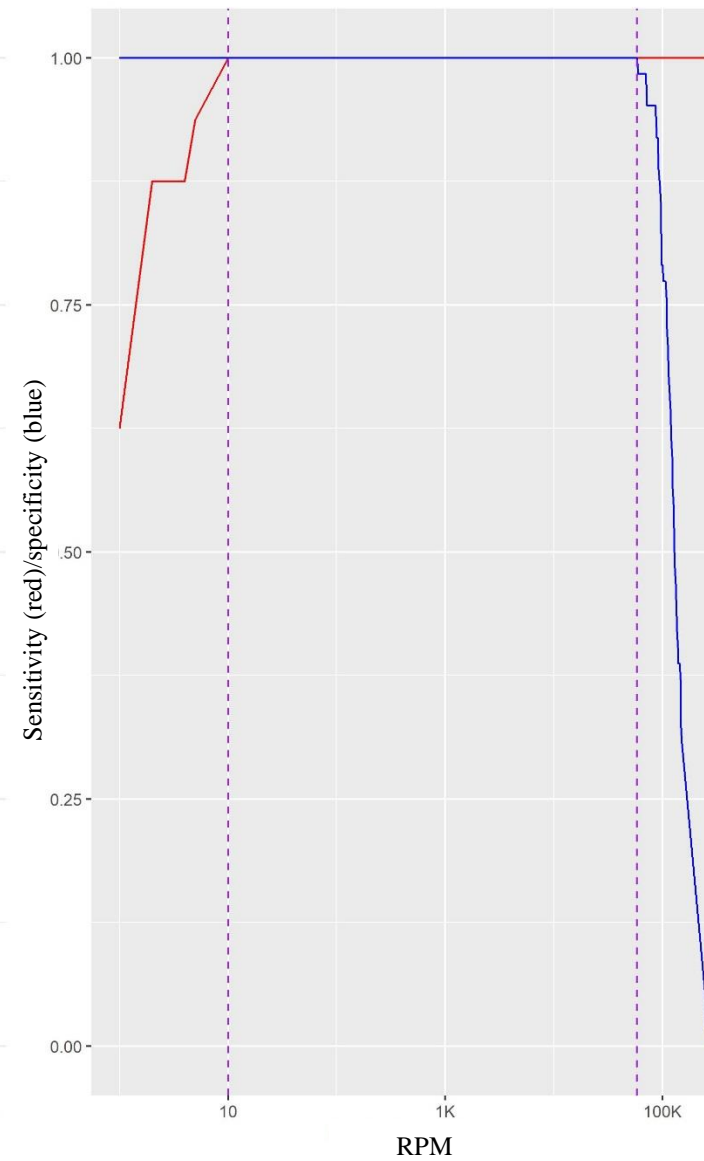

Figure S41

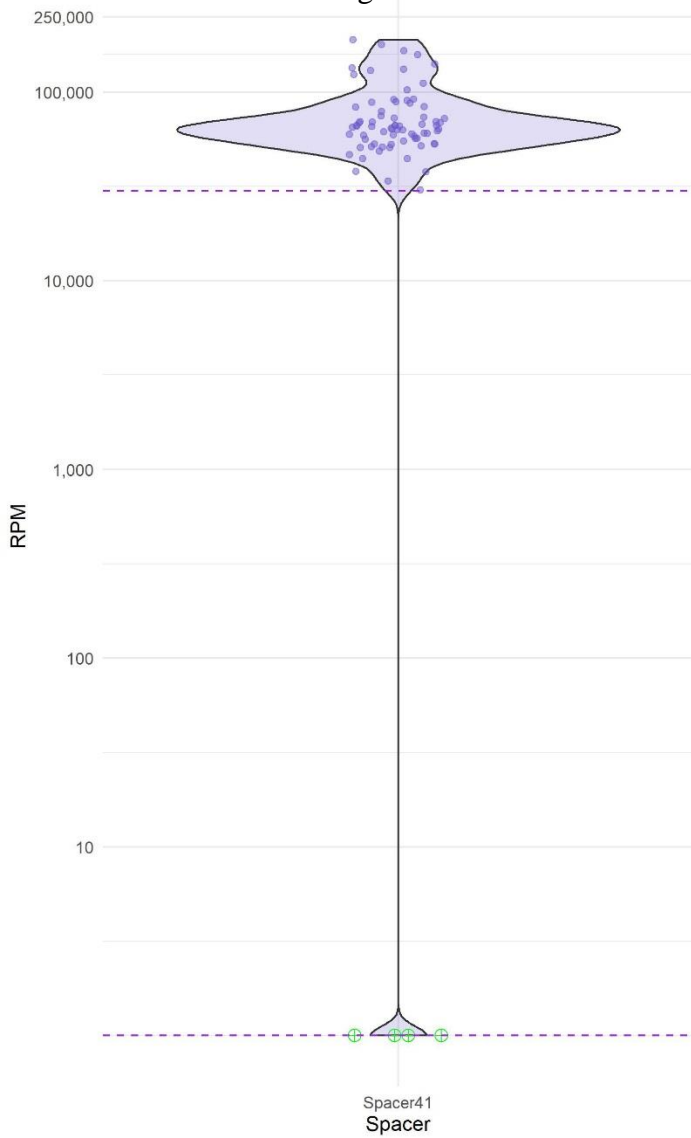

MutScan Spacer41

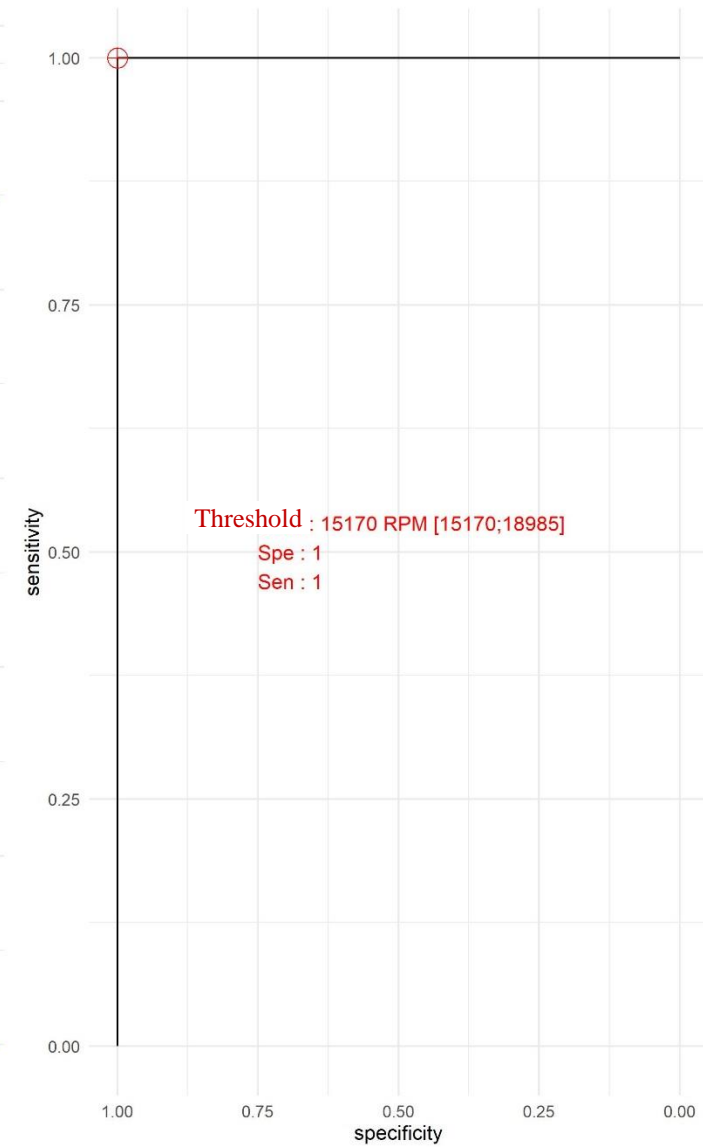

Threshold : [1;30000]

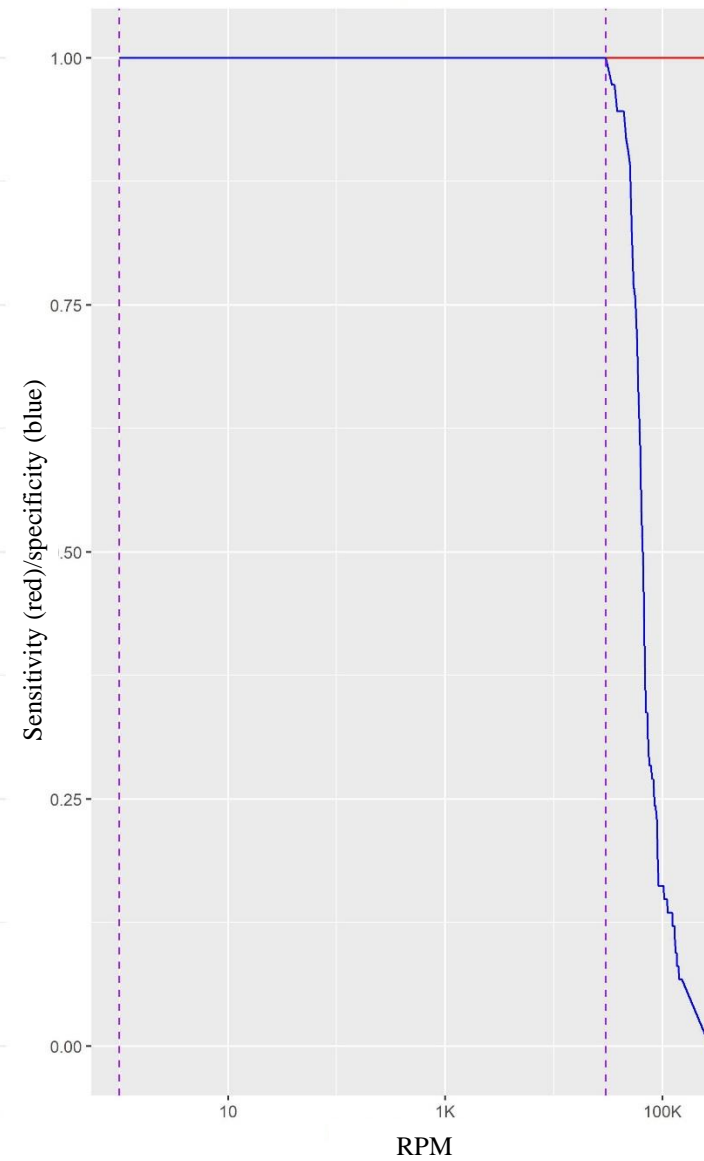

Figure S42

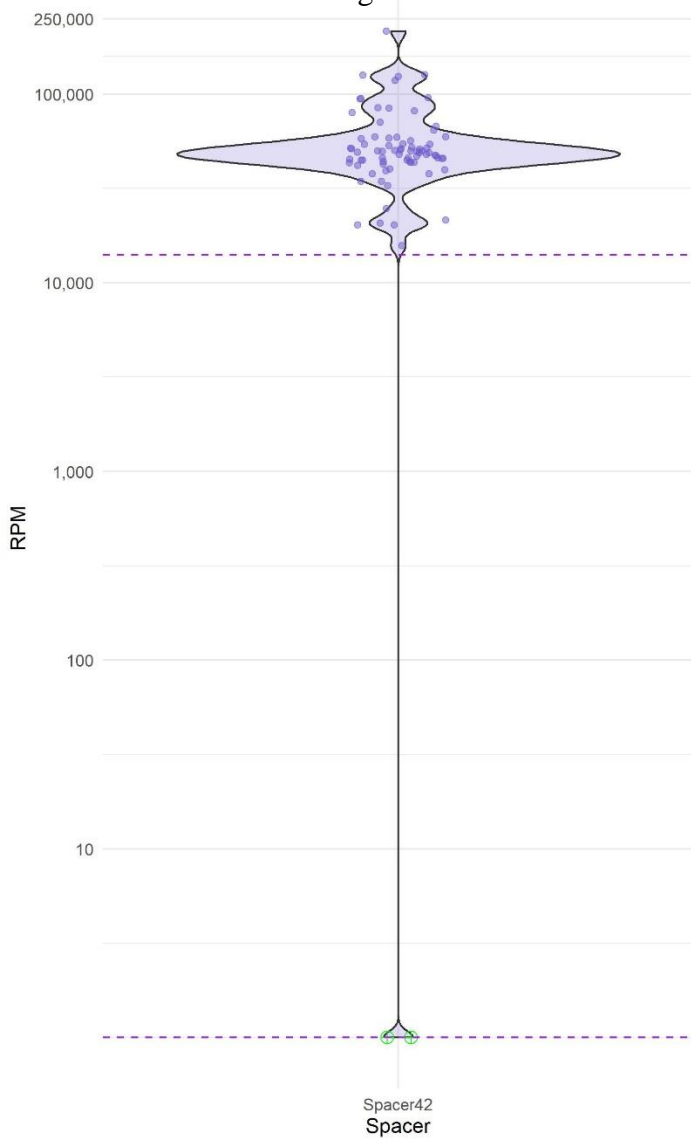

MutScan Spacer42

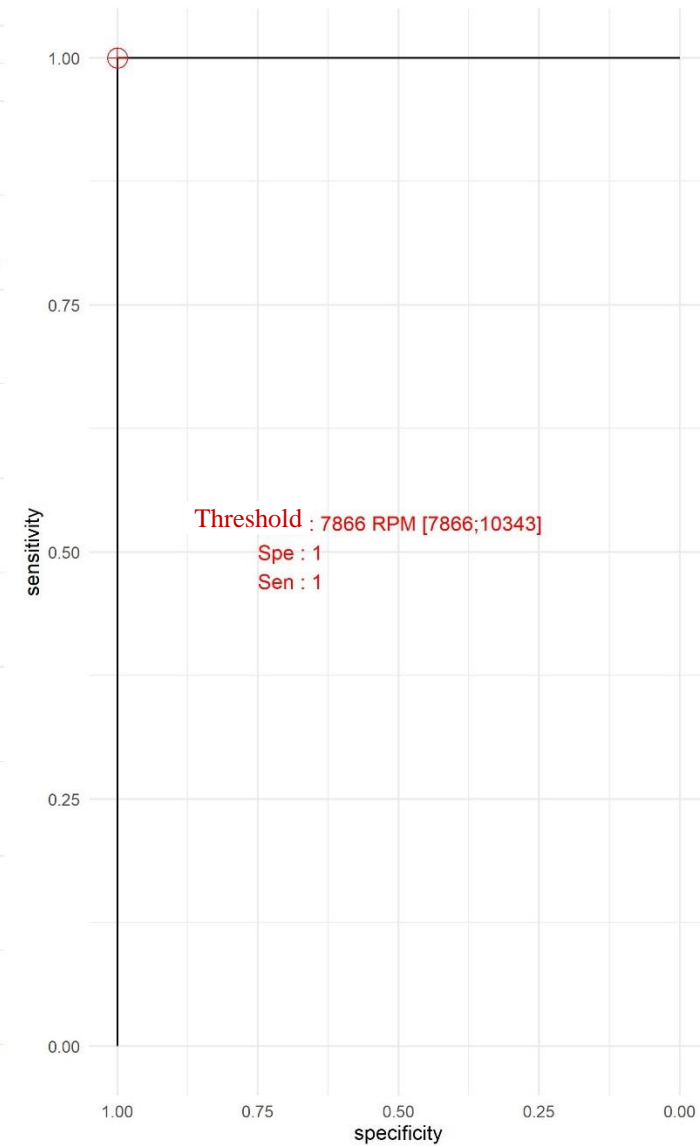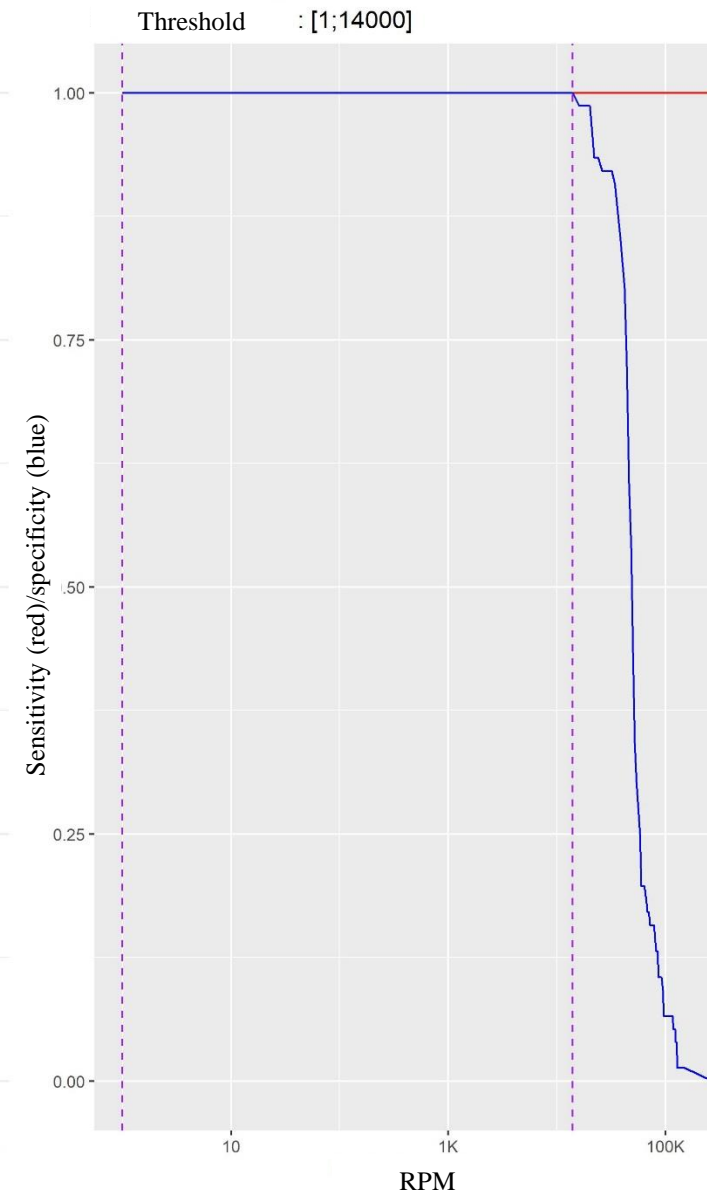

Figure S43

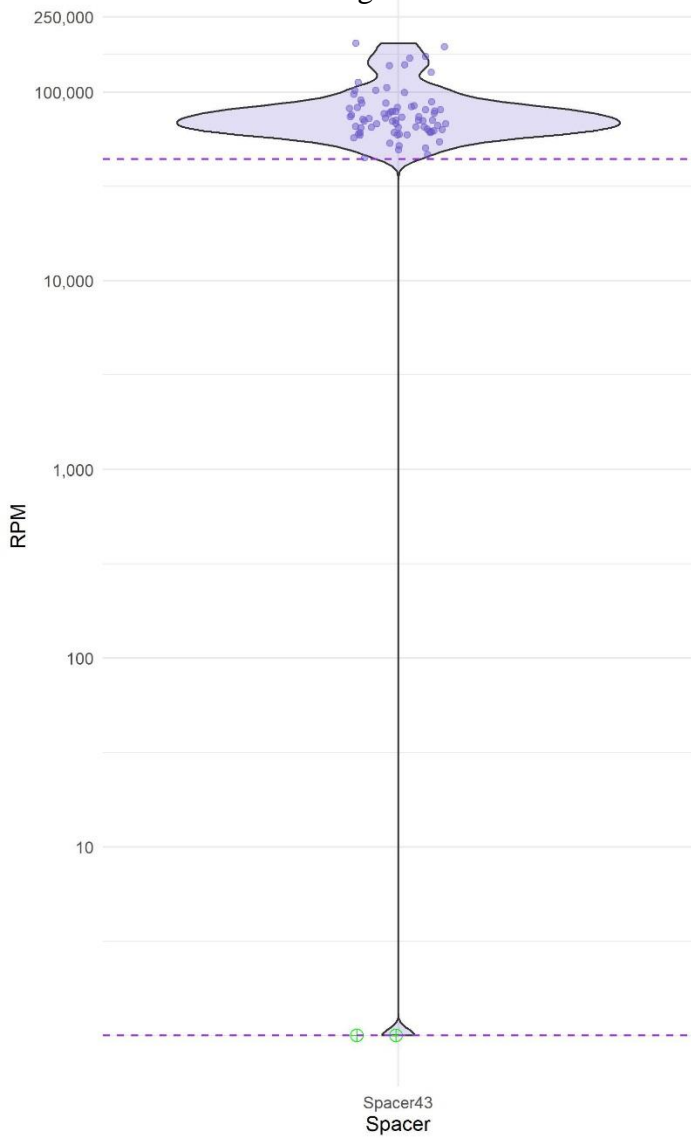

MutScan Spacer43

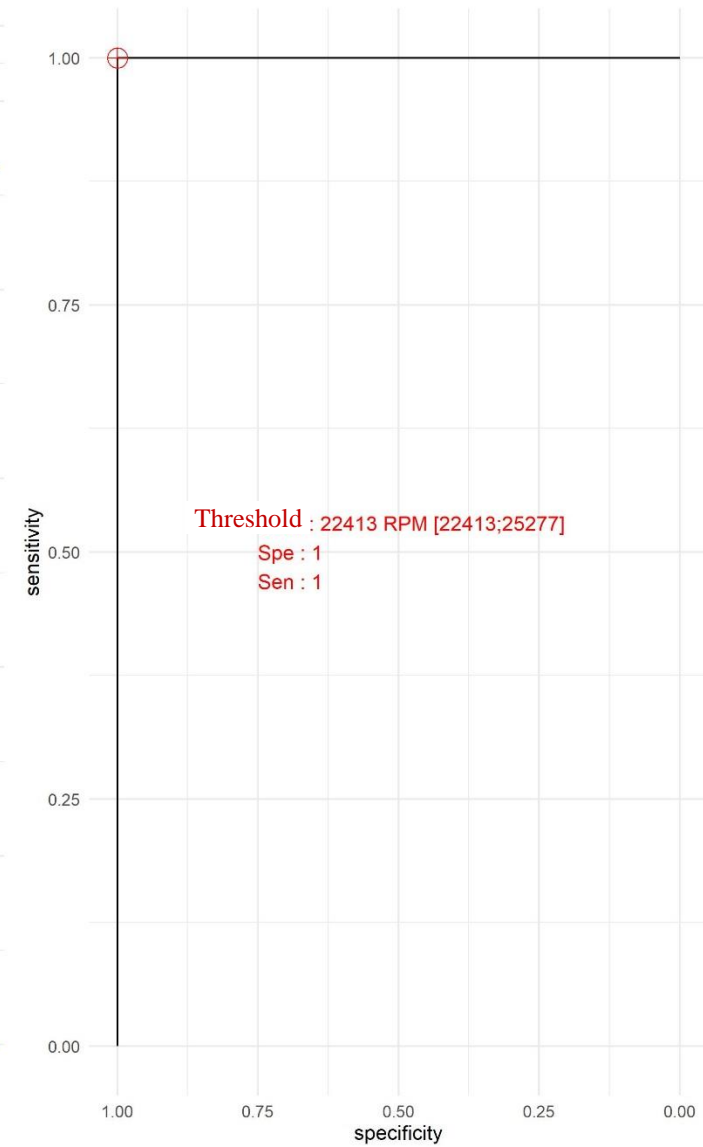

Threshold : [1;44000]

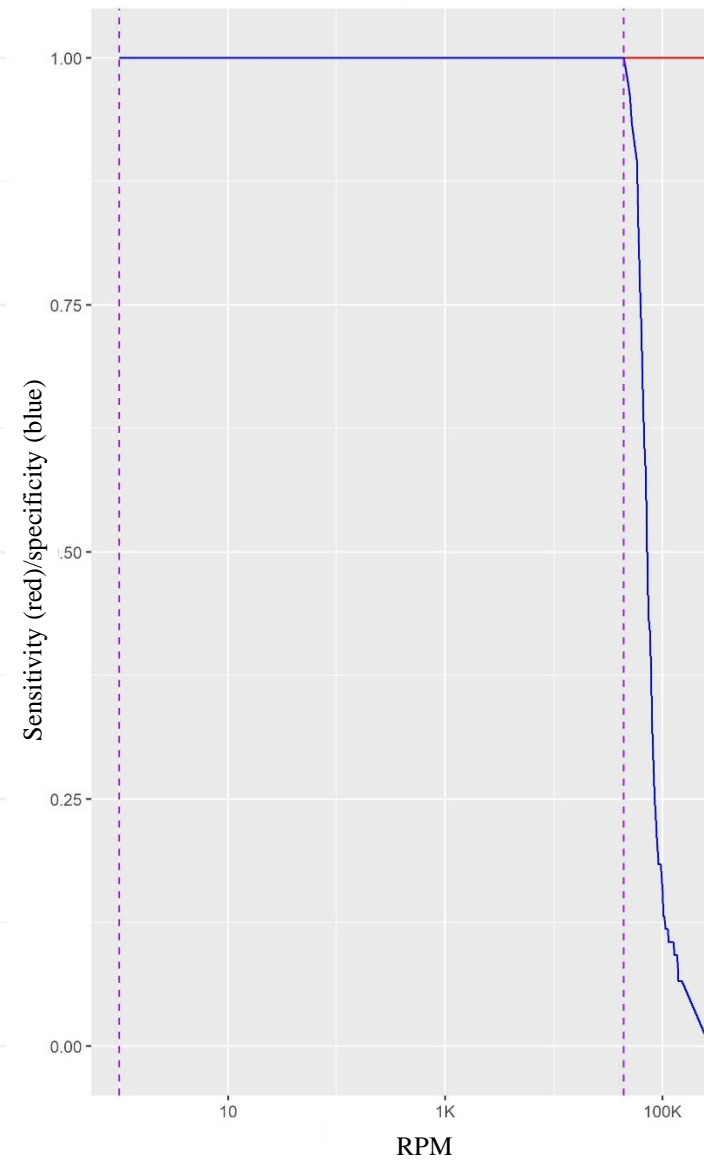

Supplement: s1 [file s1]
